# Supplementary material for: The colonization of the oceans by calcifying pelagic algae
Source: Copernicus journal article supplement (doi:10.5194/bg-2018-493), 2018-12-11
Supplement: Supplementary file 1 [file Table_S1.xlsx]

## Sheet: Total
Country	Site	Age (Ma)	Nannofossil Absolute Abundance (nanno/g)	Sedimentation rate (m/Myr)	Nannofossil AR (nanno/m²/yr)
East Pacific	ODP806B	0.125714	4.13028e+10	26.25	8.4626e+11
South Atlantic	DSDP525A	0.153683	4.01414e+10	4.84324	1.67358e+11
Indian Ocean	ODP707A	0.41	1.44556e+09	4	4.72271e+09
Indian Ocean	ODP752A	0.778333	1.80893e+09	3.24324	4.82185e+09
North Atlantic	ODP982B	1.02492	4.18269e+10	31.5	1.26592e+12
South Atlantic	DSDP525B	1.14475	2.42007e+10	4.84324	1.28039e+11
Indian Ocean	ODP707A	1.31261	1.43113e+09	7.15447	6.98144e+09
Indian Ocean	ODP752A	1.69717	1.23913e+10	3.24324	3.62906e+10
North Atlantic	ODP982B	2.01175	1.61482e+10	21.0526	3.35865e+11
Indian Ocean	ODP707A	2.21145	1.26156e+09	7.84091	6.8063e+09
South Atlantic	DSDP525B	2.301	1.44329e+10	4.84324	7.4976e+10
East Pacific	ODP806B	2.35484	3.42314e+10	27.727	8.4535e+11
Indian Ocean	ODP707A	2.51754	2.9532e+09	7.84091	1.63067e+10
Italy	Punta Grande/Punta Piccola	2.6	4.18753e+09	116.8	1.32058e+12
Italy	Punta Grande/Punta Piccola	2.60739	5.22938e+09	116.8	1.64914e+12
Indian Ocean	ODP752A	2.61	1.61383e+10	3.33333	5.70195e+10
Italy	Punta Grande/Punta Piccola	2.61597	3.45783e+09	116.8	1.09046e+12
Italy	Punta Grande/Punta Piccola	2.62748	4.69595e+09	116.8	1.48091e+12
Italy	Punta Grande/Punta Piccola	2.63714	4.09256e+09	116.8	1.29063e+12
Italy	Punta Grande/Punta Piccola	2.65664	2.02529e+09	116.8	6.38696e+11
Italy	Punta Grande/Punta Piccola	2.67866	2.57003e+09	116.8	8.10484e+11
Italy	Punta Grande/Punta Piccola	2.7	3.85039e+09	116.8	1.21426e+12
Italy	Punta Grande/Punta Piccola	2.73108	3.50549e+09	37.7	3.56824e+11
Italy	Punta Grande/Punta Piccola	2.75743	2.99552e+09	37.7	3.04914e+11
Italy	Punta Grande/Punta Piccola	2.78007	3.56962e+09	37.7	3.63351e+11
Italy	Punta Grande/Punta Piccola	2.8	4.0386e+09	37.7	4.1109e+11
Italy	Punta Grande/Punta Piccola	2.82234	4.34059e+09	37.7	4.41829e+11
Italy	Punta Grande/Punta Piccola	2.84362	1.87305e+09	37.7	1.90658e+11
Italy	Punta Grande/Punta Piccola	2.86596	2.62207e+09	37.7	2.66901e+11
Italy	Punta Grande/Punta Piccola	2.8922	2.96562e+09	37.7	3.0187e+11
Italy	Punta Grande/Punta Piccola	2.9	2.65021e+09	37.7	2.69765e+11
Italy	Punta Grande/Punta Piccola	2.92558	4.26308e+09	37.7	4.33939e+11
Italy	Punta Grande/Punta Piccola	2.94009	4.74268e+09	37.7	4.82757e+11
Italy	Punta Grande/Punta Piccola	2.95415	2.00523e+09	37.7	2.04112e+11
Italy	Punta Grande/Punta Piccola	2.97028	5.87239e+09	37.7	5.97751e+11
North Atlantic	ODP982B	2.97237	7.30432e+10	25.3839	1.97006e+12
Italy	Punta Grande/Punta Piccola	2.98249	2.4082e+09	37.7	2.45131e+11
Italy	Punta Grande/Punta Piccola	2.99147	4.39268e+09	37.7	4.47131e+11
Italy	Punta Grande/Punta Piccola	3	3.5079e+09	37.7	3.5707e+11
Italy	Punta Grande/Punta Piccola	3.00675	5.44861e+09	37.7	5.54614e+11
Italy	Punta Grande/Punta Piccola	3.01308	2.74481e+09	37.7	2.79394e+11
Indian Ocean	ODP707A	3.01861	3.466e+09	9.27835	2.45553e+10
Italy	Punta Grande/Punta Piccola	3.02595	3.74327e+09	37.7	3.81028e+11
Italy	Punta Grande/Punta Piccola	3.04072	3.49467e+09	37.7	3.55723e+11
Italy	Punta Grande/Punta Piccola	3.05084	3.81729e+09	37.7	3.88561e+11
Italy	Punta Grande/Punta Piccola	3.06414	1.63942e+09	37.7	1.66876e+11
Italy	Punta Grande/Punta Piccola	3.07468	6.45636e+09	37.7	6.57193e+11
Italy	Punta Grande/Punta Piccola	3.0808	2.53836e+09	37.7	2.5838e+11
Italy	Punta Grande/Punta Piccola	3.1	6.16937e+09	37.7	6.27981e+11
Italy	Punta Grande/Punta Piccola	3.12721	2.16707e+09	37.7	2.20586e+11
Italy	Punta Grande/Punta Piccola	3.14806	2.19244e+09	37.7	2.23169e+11
Indian Ocean	ODP707A	3.18028	2.77614e+09	9.27835	1.98568e+10
Italy	Punta Grande/Punta Piccola	3.18163	1.75639e+09	37.7	1.78783e+11
Italy	Punta Grande/Punta Piccola	3.19117	5.05139e+09	37.7	5.14181e+11
Italy	Punta Grande/Punta Piccola	3.2	4.80565e+09	37.7	4.89167e+11
Italy	Punta Grande/Punta Piccola	3.21578	6.93214e+09	37.7	7.05622e+11
Italy	Punta Grande/Punta Piccola	3.22036	3.06942e+09	37.7	3.12436e+11
Italy	Punta Grande/Punta Piccola	3.24936	1.02082e+10	37.7	1.03909e+12
Italy	Punta Grande/Punta Piccola	3.25115	5.25313e+09	37.7	5.34716e+11
Italy	Punta Grande/Punta Piccola	3.2631	1.01276e+10	37.7	1.03088e+12
Italy	Punta Grande/Punta Piccola	3.27659	4.21382e+09	37.7	4.28924e+11
Italy	Punta Grande/Punta Piccola	3.27939	7.47105e+09	37.7	7.60478e+11
Italy	Punta Grande/Punta Piccola	3.29695	7.43701e+09	37.7	7.57013e+11
Italy	Punta Grande/Punta Piccola	3.3	4.37366e+09	37.7	4.45195e+11
Italy	Punta Grande/Punta Piccola	3.32031	5.15159e+09	37.7	5.24381e+11
Italy	Punta Grande/Punta Piccola	3.32891	7.36e+09	37.7	7.49174e+11
Italy	Punta Grande/Punta Piccola	3.33854	7.39532e+09	37.7	7.5277e+11
Italy	Punta Grande/Punta Piccola	3.35547	7.78868e+09	37.7	7.9281e+11
Italy	Punta Grande/Punta Piccola	3.36146	5.52696e+09	37.7	5.62589e+11
Italy	Punta Grande/Punta Piccola	3.37917	1.05968e+10	37.7	1.07865e+12
Italy	Punta Grande/Punta Piccola	3.4	6.5012e+09	37.7	6.61757e+11
Italy	Punta Grande/Punta Piccola	3.44721	5.70978e+09	37.7	5.81198e+11
Italy	Punta Grande/Punta Piccola	3.4684	6.0832e+09	37.7	6.19209e+11
Italy	Punta Grande/Punta Piccola	3.5	8.33669e+09	37.7	8.48591e+11
Italy	Punta Grande/Punta Piccola	3.52395	9.56554e+09	37.7	9.73676e+11
Italy	Punta Grande/Punta Piccola	3.54454	8.37915e+09	37.7	8.52914e+11
Italy	Punta Grande/Punta Piccola	3.56387	9.06465e+09	37.7	9.22691e+11
Italy	Punta Grande/Punta Piccola	3.6	9.72821e+09	37.7	9.90234e+11
South Atlantic	DSDP525B	3.6534	3.66077e+10	4.84324	1.94231e+11
Indian Ocean	ODP707A	3.72994	8.28317e+08	9.27835	5.80448e+09
East Pacific	ODP806B	4.00054	2.59721e+10	38.546	9.21159e+11
Italy	Punta de Maiata	4.12	2.18873e+09	143	8.45067e+11
Italy	Punta de Maiata	4.12077	1.51678e+09	143	5.8563e+11
Italy	Punta de Maiata	4.12161	9.49094e+08	143	3.66445e+11
Italy	Punta de Maiata	4.1221	2.17088e+09	143	8.38176e+11
Italy	Punta de Maiata	4.12245	1.57452e+09	143	6.07924e+11
Italy	Punta de Maiata	4.12287	1.7838e+09	143	6.88724e+11
Italy	Punta de Maiata	4.1235	2.27518e+09	143	8.78445e+11
Italy	Punta de Maiata	4.12427	1.99689e+09	143	7.70999e+11
Italy	Punta de Maiata	4.12497	1.63432e+09	143	6.31009e+11
Italy	Punta de Maiata	4.12517	2.95971e+09	143	1.14274e+12
Italy	Punta de Maiata	4.12622	2.43719e+09	143	9.40999e+11
Italy	Punta de Maiata	4.13	2.75985e+09	143	1.06558e+12
Indian Ocean	ODP752A	4.14351	9.18947e+09	4.06593	3.72414e+10
East Pacific	ODP806B	4.36115	1.25678e+10	38.546	4.54369e+11
North Atlantic	ODP982B	4.40648	6.16291e+10	52.16	3.74641e+12
South Atlantic	DSDP525B	4.58945	3.08722e+10	19.0893	6.76321e+11
East Pacific	ODP806B	5.00064	3.67684e+10	38.546	1.35611e+12
Indian Ocean	ODP752A	5.22568	5.37405e+09	4.06593	2.3214e+10
Indian Ocean	ODP752A	5.79135	8.72624e+09	4.06593	3.21783e+10
Indian Ocean	ODP752A	5.98811	7.14506e+09	4.06593	2.60625e+10
Indian Ocean	ODP752A	6.57838	5.10168e+09	4.06593	1.87387e+10
South Atlantic	DSDP525B	6.59948	4.08562e+10	19.0893	9.32286e+11
East Pacific	ODP806B	6.60003	1.29475e+10	38.546	5.09458e+11
North Atlantic	ODP982B	6.63712	1.25102e+10	49.2846	7.33176e+11
Indian Ocean	ODP752A	6.97189	7.44082e+09	4.06593	2.7707e+10
Indian Ocean	ODP707A	7.30902	7.58688e+09	11.2363	7.60839e+10
East Pacific	ODP806B	7.58903	2.34179e+10	43.4612	1.0636e+12
East Pacific	ODP806B	8.00089	2.50067e+10	43.4612	1.13115e+12
Indian Ocean	ODP752A	8.202	3.81952e+09	5.35714	1.90911e+10
South Atlantic	DSDP525B	8.63256	2.09095e+10	13.1041	3.23694e+11
Indian Ocean	ODP752A	9.19133	2.99591e+09	5.35714	1.41072e+10
East Pacific	ODP806B	9.44356	5.83278e+09	43.4612	2.65095e+11
North Atlantic	ODP982B	9.98657	2.43338e+10	36.2917	1.09626e+12
Indian Ocean	ODP752A	10.5073	3.81454e+09	5.35714	1.86406e+10
South Atlantic	DSDP525B	10.7846	1.57785e+10	13.1041	2.4936e+11
Indian Ocean	ODP752A	11.7393	5.76721e+09	5.35714	3.30334e+10
South Atlantic	DSDP525B	12.7229	8.60978e+09	13.1041	1.34566e+11
North Atlantic	ODP982B	13.042	1.8667e+10	35.037	8.33086e+11
Indian Ocean	ODP752A	13.55	3.8154e+09	5.35714	2.06346e+10
Indian Ocean	ODP752A	15.21	2.58661e+09	3.61446	1.09163e+10
North Atlantic	ODP982B	15.9993	1.2981e+10	20.4848	3.91303e+11
East Pacific	ODP806B	16.4768	4.66635e+09	23.9664	1.37547e+11
North Atlantic	DSDP608	16.5653	3.13979e+09	10	3.62803e+10
South Pacific	DSDP588C	16.7341	5.31383e+09	10	5.49981e+10
North Atlantic	DSDP608	16.7487	4.25852e+09	10	4.92072e+10
South Atlantic	DSDP516	16.7618	6.59356e+09	17	1.32827e+11
South Atlantic	DSDP516	17.0789	3.3559e+09	17	6.76045e+10
North Atlantic	DSDP608	17.163	9.28181e+09	10	1.07251e+11
North Atlantic	DSDP608	17.2564	3.43082e+09	10	3.96432e+10
South Atlantic	DSDP516	17.2994	4.47907e+09	17	9.0231e+10
South Atlantic	DSDP516	17.4669	4.58366e+09	17	9.23379e+10
South Pacific	DSDP588C	17.5099	5.19906e+09	10	5.38103e+10
North Atlantic	DSDP608	17.5739	2.03458e+09	10	2.35096e+10
South Atlantic	DSDP516	17.6665	5.69926e+09	17	1.14812e+11
North Atlantic	DSDP608	17.6967	4.79738e+09	10	5.54338e+10
South Atlantic	DSDP516	17.8734	4.93705e+09	17	9.94569e+10
South Pacific	DSDP588C	17.8735	3.54854e+09	10	3.67274e+10
South Atlantic	DSDP516	17.9878	3.14602e+09	17	6.33765e+10
South Atlantic	DSDP516	18.0897	7.2029e+09	17	1.45102e+11
North Atlantic	DSDP608	18.3204	4.42762e+09	10	5.11611e+10
South Pacific	DSDP588C	18.4081	4.87412e+09	10	5.04471e+10
North Atlantic	DSDP608	18.4103	6.09142e+09	10	7.03863e+10
North Atlantic	DSDP608	18.4873	2.59967e+09	10	3.00392e+10
South Pacific	DSDP588C	18.4933	3.56127e+09	10	3.68591e+10
North Atlantic	DSDP608	18.579	2.5389e+09	10	2.9337e+10
South Pacific	DSDP588C	18.6555	3.81972e+09	10	3.95341e+10
North Atlantic	DSDP608	18.6655	3.75374e+09	10	4.33744e+10
South Pacific	DSDP588C	18.7092	6.08395e+09	10	6.29689e+10
South Atlantic	DSDP516	18.7137	4.89916e+09	17	9.86935e+10
South Pacific	DSDP588C	18.7391	3.64629e+09	10	3.77391e+10
South Pacific	DSDP588C	19.0124	6.80274e+09	10	7.04083e+10
North Atlantic	DSDP608	19.0617	6.27835e+09	10	7.25464e+10
South Pacific	DSDP588C	19.0826	6.72404e+09	10	6.95938e+10
South Atlantic	DSDP516	19.1494	4.21887e+09	17	8.49891e+10
North Atlantic	DSDP608	19.1586	6.44942e+09	10	7.4523e+10
North Atlantic	DSDP608	19.2373	3.7682e+09	10	4.35416e+10
South Atlantic	DSDP516	19.442	5.65162e+09	17	1.13852e+11
South Pacific	DSDP588C	19.643	6.46028e+09	10	6.68639e+10
South Atlantic	DSDP516	19.662	5.43543e+09	17	1.09497e+11
South Atlantic	DSDP516	19.7049	6.02123e+09	17	1.21298e+11
South Pacific	DSDP588C	19.7566	4.83149e+09	10	5.00059e+10
South Atlantic	DSDP516	19.92	6.58071e+09	17	1.32568e+11
South Pacific	DSDP588C	20.0092	4.7479e+09	10	4.91408e+10
South Pacific	DSDP588C	20.1564	6.3283e+09	10	6.54979e+10
South Atlantic	DSDP516	20.1602	5.51657e+09	17	1.11131e+11
South Pacific	DSDP588C	20.2055	4.12362e+09	10	4.26795e+10
South Pacific	DSDP588C	20.2577	3.58655e+09	10	3.71208e+10
South Pacific	DSDP588C	20.377	5.67111e+09	10	5.8696e+10
South Atlantic	DSDP516	20.4457	6.90619e+09	17	1.39125e+11
North Atlantic	DSDP608	20.4984	5.17885e+09	10	5.98416e+10
South Atlantic	DSDP516	20.5393	6.11531e+09	17	1.23193e+11
North Atlantic	DSDP608	20.5849	3.22444e+09	10	3.72584e+10
South Atlantic	DSDP516	20.6614	5.15147e+09	17	1.03776e+11
South Atlantic	DSDP516	20.783	3.1177e+09	17	6.28061e+10
North Atlantic	DSDP608	20.8124	4.66765e+09	10	5.39347e+10
South Atlantic	DSDP516	20.8343	9.00191e+09	17	1.81344e+11
North Atlantic	DSDP608	21.0434	2.67036e+09	10	3.0856e+10
South Atlantic	DSDP516	21.14	3.56019e+09	17	7.172e+10
South Atlantic	DSDP516	21.1621	5.7376e+09	17	1.15584e+11
South Atlantic	DSDP516	21.1752	3.4673e+09	17	6.98488e+10
South Atlantic	DSDP516	21.1961	2.96562e+09	17	5.97424e+10
South Atlantic	DSDP516	21.2127	4.31083e+09	17	8.68416e+10
South Atlantic	DSDP516	21.23	1.98493e+09	17	3.99863e+10
North Atlantic	DSDP608	21.2423	3.79698e+09	10	4.38741e+10
South Atlantic	DSDP516	21.2467	4.93021e+09	17	9.93191e+10
South Atlantic	DSDP516	21.2944	5.25138e+09	17	1.05789e+11
South Atlantic	DSDP516	21.5322	5.13092e+09	17	1.03362e+11
South Atlantic	DSDP516	21.8481	2.35896e+09	17	4.75213e+10
North Atlantic	DSDP608	21.853	3.21558e+09	10	3.7156e+10
North Atlantic	DSDP608	21.981	3.72444e+09	10	4.30359e+10
North Atlantic	DSDP608	22.0814	5.542e+09	10	6.40378e+10
South Atlantic	DSDP516	22.1222	3.74014e+09	17	7.53451e+10
South Atlantic	DSDP516	22.3875	5.35789e+09	17	1.07935e+11
South Pacific	DSDP588C	22.4791	5.12646e+09	10	5.56862e+10
North Atlantic	DSDP608	22.4957	3.0042e+09	10	3.47135e+10
South Atlantic	DSDP516	22.6467	6.77442e+09	17	1.36471e+11
South Atlantic	DSDP516	22.8434	3.41046e+09	17	6.87038e+10
South Atlantic	DSDP516	23.0091	7.39825e+09	17	1.49038e+11
North Atlantic	DSDP608	23.2578	3.85127e+09	10	4.45014e+10
South Pacific	DSDP588C	23.3401	8.24712e+09	10	8.95843e+10
South Pacific	DSDP588C	23.4336	6.98333e+09	10	7.58564e+10
South Pacific	DSDP588C	23.5426	8.90733e+09	10	9.67558e+10
South Pacific	DSDP588C	23.6433	8.60875e+09	10	9.35125e+10
South Pacific	DSDP588C	23.9171	5.10148e+09	10	5.54149e+10
South Atlantic	DSDP516	24.7834	4.86711e+09	17	9.80478e+10
South Pacific	DSDP588C	24.8963	3.76972e+09	10	4.09486e+10
South Pacific	DSDP588C	25.0177	4.98633e+09	10	5.4164e+10
South Pacific	DSDP588C	25.1091	2.49451e+09	10	2.70966e+10
South Atlantic	DSDP511	31.3653	4.01534e+08	38.8085	1.1395e+10
South Atlantic	DSDP511	31.4918	5.31413e+08	38.8085	1.50808e+10
South Atlantic	DSDP511	31.5307	1.20916e+09	38.8085	3.43145e+10
South Atlantic	DSDP511	31.5669	8.05601e+08	38.8085	2.28619e+10
South Atlantic	DSDP511	31.603	2.21049e+08	38.8085	6.27308e+09
South Atlantic	DSDP511	31.7336	6.50852e+08	38.8085	1.84703e+10
South Atlantic	DSDP511	31.7742	3.75424e+08	38.8085	1.0654e+10
South Atlantic	DSDP511	31.7984	6.1787e+08	38.8085	1.75344e+10
South Atlantic	DSDP511	31.9737	3.37651e+08	38.8085	9.5821e+09
South Atlantic	DSDP511	32.0136	2.91865e+08	38.8085	8.28275e+09
South Atlantic	DSDP511	32.0475	3.49467e+08	38.8085	9.91743e+09
South Atlantic	DSDP511	32.083	1.90647e+08	38.8085	5.41032e+09
South Atlantic	DSDP511	32.2128	4.66854e+08	38.8085	1.32487e+10
South Atlantic	DSDP511	32.2509	4.24873e+08	38.8085	1.20573e+10
South Atlantic	DSDP511	32.2902	5.34975e+08	38.8085	1.51819e+10
South Atlantic	DSDP511	32.3165	6.32031e+08	38.8085	1.79362e+10
South Atlantic	DSDP511	32.4544	4.91107e+08	38.8085	1.3937e+10
South Atlantic	DSDP511	32.5695	8.29107e+08	38.8085	2.3529e+10
South Atlantic	DSDP511	32.9361	5.04244e+08	38.8085	1.43098e+10
South Atlantic	DSDP511	32.9721	3.79163e+08	38.8085	1.07602e+10
South Atlantic	DSDP511	33.0136	6.62124e+08	38.8085	1.87902e+10
South Atlantic	DSDP511	33.0462	6.30215e+08	38.8085	1.78847e+10
South Atlantic	DSDP511	33.0829	8.07982e+08	38.8085	2.29295e+10
South Atlantic	DSDP511	33.1191	7.10406e+08	38.8085	2.01604e+10
South Atlantic	DSDP511	33.3922	1.17517e+09	38.8085	2.41836e+10
South Atlantic	DSDP511	33.4297	4.72369e+08	38.8085	1.34052e+10
South Atlantic	DSDP511	33.4682	4.03528e+08	38.8085	1.14516e+10
South Atlantic	DSDP511	33.6396	4.57237e+08	65.2703	2.18234e+10
South Atlantic	DSDP511	33.6591	3.94098e+08	65.2703	1.1093e+10
South Atlantic	DSDP511	33.781	4.69456e+08	65.2703	1.32142e+10
South Atlantic	DSDP511	34.0717	3.00923e+08	65.2703	8.47033e+09
South Atlantic	DSDP511	34.4512	7.08947e+08	10.3472	3.16349e+09
South Atlantic	DSDP511	34.5971	1.02843e+09	10.3472	4.58909e+09
South Atlantic	DSDP511	34.6994	8.71979e+08	10.3472	3.89098e+09
South Atlantic	DSDP511	35.3631	1.46994e+09	10.3472	6.55921e+09
South Atlantic	DSDP511	35.4776	7.18852e+08	10.3472	3.20769e+09
South Atlantic	DSDP511	37.2024	1.83088e+09	10.3472	8.16983e+09
South Atlantic	DSDP511	37.3608	9.37877e+08	10.3472	4.18503e+09
South Atlantic	DSDP511	37.4545	1.35643e+09	10.3472	6.05273e+09
North Pacific	ODP1209A	39.2662	1.25092e+10	6.95	9.99794e+10
North Pacific	ODP1209A	39.3381	1.20916e+10	6.95	9.66423e+10
North Pacific	ODP1209A	39.4101	1.33588e+10	6.95	1.0677e+11
North Pacific	ODP1209A	39.482	9.92578e+09	6.95	7.86419e+10
North Pacific	ODP1209A	39.6978	1.26242e+10	6.95	9.91442e+10
North Pacific	ODP1209A	39.7698	9.79266e+09	6.95	7.69067e+10
North Pacific	ODP1209A	39.8417	1.14553e+10	6.95	8.99638e+10
North Pacific	ODP1209A	40.1	7.10457e+09	1.34	1.08529e+10
North Pacific	ODP1209A	41.6224	1.32462e+10	1.34	1.97911e+10
North Pacific	ODP1209A	42	7.11877e+09	1.34	1.06362e+10
North Pacific	ODP1209A	42.3947	1.16888e+10	0.76	9.68301e+09
North Pacific	ODP1209A	43.0526	1.19551e+10	0.76	9.90363e+09
North Pacific	ODP1209A	43.7	1.77044e+10	0.76	1.46663e+10
North Pacific	ODP1209A	43.7725	1.09245e+10	6.9	8.44242e+10
North Pacific	ODP1209A	43.8449	1.64238e+10	6.9	1.26923e+11
North Pacific	ODP1209A	43.9174	1.62734e+10	6.9	1.25761e+11
North Pacific	ODP1209A	43.9899	8.929e+09	6.9	6.59228e+10
North Pacific	ODP1209A	44.0623	1.43014e+10	6.9	1.05587e+11
North Pacific	ODP1209A	44.1348	1.09942e+10	6.9	8.11702e+10
North Pacific	ODP1209A	44.2072	1.08499e+10	6.9	8.23505e+10
North Pacific	ODP1209A	44.2797	9.04147e+09	6.9	6.86248e+10
North Pacific	ODP1209A	44.3522	9.90484e+09	6.9	7.51777e+10
North Pacific	ODP1209A	44.4246	1.13288e+10	6.9	8.36404e+10
North Pacific	ODP1209A	44.4971	9.89267e+09	6.9	7.30376e+10
North Pacific	ODP1209A	44.5696	1.2318e+10	6.9	9.09439e+10
North Pacific	ODP1209A	44.6275	1.28351e+10	6.9	9.47614e+10
North Pacific	ODP1209A	44.9275	1.02978e+10	6.9	7.60286e+10
North Pacific	ODP1209A	45	1.07435e+10	6.9	7.93195e+10
North Pacific	ODP1209A	45.0725	1.82813e+10	6.9	1.34971e+11
North Pacific	ODP1209A	45.1449	1.38424e+10	6.9	1.1366e+11
North Pacific	ODP1209A	45.2174	1.4481e+10	6.9	1.18904e+11
North Pacific	ODP1209A	45.2899	1.45041e+10	6.9	1.19094e+11
North Pacific	ODP1209A	45.3623	1.00371e+10	6.9	8.1722e+10
North Pacific	ODP1209A	45.4348	1.23139e+10	6.9	1.0026e+11
North Pacific	ODP1209A	45.5	8.33828e+09	6.9	6.78903e+10
North Pacific	ODP1209A	45.5877	1.17784e+10	5.7	7.98932e+10
North Pacific	ODP1209A	45.6754	1.04857e+10	5.7	7.11246e+10
North Pacific	ODP1209A	45.7632	7.21072e+09	5.7	4.89103e+10
North Pacific	ODP1209A	45.8509	7.26036e+09	5.7	4.75917e+10
North Pacific	ODP1209A	45.9386	8.75083e+09	5.7	5.73617e+10
North Pacific	ODP1209A	46.0263	8.05698e+09	5.7	5.28135e+10
North Pacific	ODP1209A	46.114	1.02296e+10	5.7	6.53055e+10
North Pacific	ODP1209A	46.2018	7.73209e+09	5.7	4.93617e+10
North Pacific	ODP1209A	46.2895	1.13477e+10	5.7	7.24435e+10
North Pacific	ODP1209A	46.3772	8.89623e+09	5.7	5.9836e+10
North Pacific	ODP1209A	46.7421	1.32374e+10	5.7	9.35622e+10
North Pacific	ODP1209A	46.8298	1.20328e+10	5.7	8.50478e+10
North Pacific	ODP1209A	46.9175	1.06335e+10	5.7	7.51572e+10
North Pacific	ODP1209A	47.0053	7.06375e+09	5.7	5.15371e+10
North Pacific	ODP1209A	47.093	7.59478e+09	5.7	5.54115e+10
North Pacific	ODP1209A	47.1807	6.12839e+09	5.7	4.47127e+10
North Pacific	ODP1209A	47.2684	8.18934e+09	5.7	6.02163e+10
North Pacific	ODP1209A	47.3561	8.72531e+09	5.7	6.41572e+10
North Pacific	ODP1209A	47.4439	9.16179e+09	5.7	6.73667e+10
North Pacific	ODP1209A	47.5316	8.66208e+09	5.7	6.12236e+10
North Pacific	ODP1209A	47.6193	7.9686e+09	5.7	5.63221e+10
North Pacific	ODP1209A	47.707	8.98157e+09	5.7	6.34817e+10
Egypt	Wadi Abu Ghurra	51.2383	1000000	17.6471	4.76471e+07
Egypt	Wadi Abu Ghurra	52.1733	2000000	17.6471	9.52941e+07
Egypt	Wadi Abu Ghurra	53.93	2000000	17.6471	9.52941e+07
Egypt	Wadi Abu Ghurra	54.0433	75000000	17.6471	3.57353e+09
Egypt	Wadi Abu Ghurra	54.1	18000000	17.6471	8.57647e+08
Egypt	Wadi Abu Ghurra	54.2133	40000000	17.6471	1.90588e+09
Egypt	Kurkur Naqb Dungul	54.225	16000000	5.71429	2.46857e+08
Egypt	Kurkur Naqb Dungul	54.575	38000000	5.71429	5.86286e+08
Egypt	Kurkur Naqb Dungul	54.75	15000000	5.71429	2.31429e+08
Egypt	Wadi Abu Ghurra	54.78	15000000	17.6471	7.14706e+08
Egypt	Wadi Abu Ghurra	54.8367	15000000	17.6471	7.14706e+08
Egypt	Wadi Abu Ghurra	55.2333	18000000	17.6471	8.57647e+08
Egypt	Wadi Abu Ghurra	55.29	15000000	17.6471	7.14706e+08
Egypt	Wadi Abu Ghurra	55.4033	23000000	17.6471	1.09588e+09
Egypt	Kurkur Naqb Dungul	55.45	15000000	5.71429	2.31429e+08
Egypt	Wadi Abu Ghurra	55.6017	50000000	17.6471	2.38235e+09
Central Atlantic	ODP1260B	55.679	1680000000	12.1	54885600000
Central Atlantic	ODP1260B	55.6997	4.06e+09	12.1	1.3264e+11
Central Atlantic	ODP1260B	55.7203	1150000000	12.1	37570500000
Central Atlantic	ODP1260B	55.741	1530000000	12.1	49985100000
Egypt	Wadi Abu Ghurra	55.7433	55000000	17.6471	2.62059e+09
Central Atlantic	ODP1260B	55.7617	2580000000	12.1	84288600000
Central Atlantic	ODP1260B	55.7823	730000000	12.1	23849100000
Egypt	Wadi Abu Ghurra	55.8	40000000	17.6471	1.90588e+09
Egypt	Kurkur Naqb Dungul	55.8	25000000	5.71429	3.85714e+08
Central Atlantic	ODP1260B	55.803	1820000000	12.1	5.94594e+10
Central Atlantic	ODP1260B	55.8236	1550000000	12.1	50638500000
Central Atlantic	ODP1260B	55.8443	980000000	12.1	3.20166e+10
Central Atlantic	ODP1260B	55.865	1830000000	12.1	5.97861e+10
Central Atlantic	ODP1260B	55.8856	2300000000	12.1	75141000000
Central Atlantic	ODP1260B	55.8898	2230000000	12.1	72854100000
Central Atlantic	ODP1260B	55.8939	1670000000	12.1	54558900000
Central Atlantic	ODP1260B	55.898	1980000000	12.1	6.46866e+10
South Atlantic	ODP1263C	55.9012	5.34452e+09	16.1	1.20465e+11
Central Atlantic	ODP1260B	55.9021	1490000000	12.1	48678300000
Central Atlantic	ODP1260B	55.9063	1120000000	12.1	36590400000
South Atlantic	ODP1263C	55.9075	7.14707e+09	16.1	1.61095e+11
Central Atlantic	ODP1260B	55.9104	1410000000	12.1	46064700000
South Atlantic	ODP1263C	55.9137	4.32184e+09	16.1	9.74144e+10
Central Atlantic	ODP1260B	55.9145	1.07e+09	12.1	3.49569e+10
Central Atlantic	ODP1260B	55.9187	1100000000	12.1	35937000000
South Atlantic	ODP1263C	55.9193	5.5559e+09	16.1	1.2523e+11
Central Atlantic	ODP1260B	55.9228	1090000000	12.1	35610300000
South Atlantic	ODP1263C	55.9255	7.6972e+09	16.1	1.73495e+11
Central Atlantic	ODP1260B	55.9269	850000000	12.1	27769500000
Central Atlantic	ODP1260B	55.9311	520000000	12.1	1.69884e+10
South Atlantic	ODP1263C	55.9317	5.7973e+09	16.1	1.30671e+11
Central Atlantic	ODP1260B	55.9352	400000000	12.1	13068000000
South Atlantic	ODP1263C	55.9379	6.61428e+09	16.1	1.49086e+11
Central Atlantic	ODP1260B	55.9393	350000000	12.1	11434500000
Central Atlantic	ODP1260B	55.9435	420000000	12.1	13721400000
South Atlantic	ODP1263C	55.9441	5.73798e+09	16.1	1.29334e+11
Central Atlantic	ODP1260B	55.9476	480000000	12.1	1.56816e+10
South Atlantic	ODP1263C	55.9503	3.37494e+09	16.1	7.60711e+10
Central Atlantic	ODP1260B	55.9517	480000000	12.1	1.56816e+10
Central Atlantic	ODP1260B	55.9559	390000000	12.1	12741300000
South Atlantic	ODP1263C	55.9565	2.82475e+09	16.1	6.36698e+10
Central Atlantic	ODP1260B	55.96	320000000	12.1	10454400000
South Atlantic	ODP1263C	55.9627	5.35025e+09	16.1	1.20595e+11
Central Atlantic	ODP1260B	55.9641	3500000	12.1	1.14345e+08
Central Atlantic	ODP1260B	55.9683	34000000	12.1	1110780000
South Atlantic	ODP1263C	55.9689	3.3376e+09	16.1	7.52295e+10
Central Atlantic	ODP1260B	55.9724	2000000000	12.1	6.534e+10
Egypt	Kurkur Naqb Dungul	55.975	35000000	5.71429	5.4e+08
South Atlantic	ODP1263C	55.9752	2.78862e+09	16.1	6.28555e+10
Central Atlantic	ODP1260B	55.9765	560000000	12.1	18295200000
South Atlantic	ODP1263C	55.9783	3.94493e+09	16.1	8.89187e+10
Central Atlantic	ODP1260B	55.9807	170000000	12.1	5553900000
South Atlantic	ODP1263C	55.9814	2.69242e+09	16.1	6.0687e+10
South Atlantic	ODP1263C	55.9845	3.27461e+09	16.1	7.38096e+10
Central Atlantic	ODP1260B	55.9848	2240000000	12.1	73180800000
South Atlantic	ODP1263C	55.9876	3.32994e+09	16.1	7.50568e+10
Central Atlantic	ODP1260B	55.9889	1650000000	12.1	53905500000
South Atlantic	ODP1263C	55.9907	3.49136e+09	16.1	7.86953e+10
Central Atlantic	ODP1260B	55.9931	410000000	12.1	13394700000
South Atlantic	ODP1263C	55.9938	3.02756e+09	16.1	6.82412e+10
South Atlantic	ODP1263C	55.9969	3.17572e+09	16.1	7.15808e+10
Central Atlantic	ODP1260B	55.9972	1110000000	12.1	36263700000
South Atlantic	ODP1263C	56	3.41594e+09	16.1	7.69952e+10
Central Atlantic	ODP1260B	56.0013	1050000000	12.1	3.43035e+10
South Atlantic	ODP1263D	56.004	3.78993e+09	12.46	6.56393e+10
Central Atlantic	ODP1260B	56.0055	2330000000	12.1	76121100000
Central Atlantic	ODP1260B	56.0096	3040000000	12.1	99316800000
South Atlantic	ODP1263D	56.012	8.49584e+09	12.46	1.47143e+11
Central Atlantic	ODP1260B	56.0137	3640000000	12.1	1.18919e+11
South Atlantic	ODP1263D	56.0161	9.83982e+09	12.46	1.7042e+11
Central Atlantic	ODP1260B	56.0179	1830000000	12.1	5.97861e+10
South Atlantic	ODP1263D	56.0201	4.53592e+09	12.46	7.85593e+10
Central Atlantic	ODP1260B	56.022	3080000000	12.1	100623600000
Central Atlantic	ODP1260B	56.0261	2590000000	12.1	84615300000
South Atlantic	ODP1263D	56.0281	5.78789e+09	12.46	1.00243e+11
Central Atlantic	ODP1260B	56.0302	4.03e+09	12.1	1.3166e+11
South Atlantic	ODP1263D	56.0321	7.15131e+09	12.46	1.23856e+11
Central Atlantic	ODP1260B	56.0344	2890000000	12.1	94416300000
South Atlantic	ODP1263D	56.0361	5.89189e+09	12.46	1.02044e+11
Central Atlantic	ODP1260B	56.055	3320000000	12.1	108464400000
Central Atlantic	ODP1260B	56.0757	420000000	12.1	13721400000
South Atlantic	ODP1263D	56.0883	5.05191e+09	12.46	8.7496e+10
Central Atlantic	ODP1260B	56.0964	4470000000	12.1	146034900000
South Atlantic	ODP1263D	56.1043	5.03591e+09	12.46	8.72189e+10
Central Atlantic	ODP1260B	56.117	1420000000	12.1	46391400000
Central Atlantic	ODP1260B	56.1377	2480000000	12.1	81021600000
Central Atlantic	ODP1260B	56.1542	1230000000	12.1	40184100000
Central Atlantic	ODP1260B	56.179	1960000000	12.1	6.40332e+10
Central Atlantic	ODP1260B	56.1997	1.07e+09	12.1	3.49569e+10
Central Atlantic	ODP1260B	56.2203	1570000000	12.1	51291900000
Central Atlantic	ODP1260B	56.241	3170000000	12.1	103563900000
Egypt	Kurkur Naqb Dungul	56.325	65000000	5.71429	1.00286e+09
Egypt	Kurkur Naqb Dungul	56.5	25000000	5.71429	3.85714e+08
Egypt	Wadi Abu Ghurra	56.6721	2000000	21.7857	1.17643e+08
Egypt	Kurkur Naqb Dungul	56.675	48000000	5.71429	7.40571e+08
Egypt	Wadi Abu Ghurra	56.718	17000000	21.7857	9.99964e+08
Egypt	Wadi Abu Ghurra	56.8098	21000000	21.7857	1.23525e+09
Egypt	Kurkur Naqb Dungul	56.85	22000000	5.71429	3.39429e+08
Egypt	Wadi Abu Ghurra	56.8787	17000000	21.7857	9.99964e+08
Egypt	Wadi Abu Ghurra	56.9934	70000000	21.7857	4.1175e+09
Egypt	Kurkur Naqb Dungul	57.025	90000000	5.71429	1.38857e+09
Egypt	Wadi Abu Ghurra	57.0852	65000000	21.7857	3.82339e+09
Egypt	Wadi Abu Ghurra	57.1311	80000000	21.7857	4.70571e+09
Egypt	Kurkur Naqb Dungul	57.2	25000000	5.71429	3.85714e+08
Egypt	Wadi Abu Ghurra	57.2	98000000	21.7857	5.7645e+09
Egypt	Wadi Abu Ghurra	57.4143	98500000	11.6667	3.10275e+09
Egypt	Wadi Abu Ghurra	57.6714	98000000	11.6667	3.087e+09
Egypt	Wadi Abu Ghurra	57.8	80000000	11.6667	2.52e+09
Egypt	Wadi Abu Ghurra	57.9457	22000000	11.6667	6.93e+08
Egypt	Wadi Abu Ghurra	58.0571	25000000	11.6667	7.875e+08
Egypt	Wadi Abu Ghurra	58.1857	25000000	11.6667	7.875e+08
Egypt	Kurkur Naqb Dungul	58.2737	20000000	15.8333	8.55e+08
Egypt	Kurkur Naqb Dungul	58.3684	500000	15.8333	2.1375e+07
Egypt	Wadi Abu Ghurra	58.5286	38000000	11.6667	1.197e+09
Egypt	Wadi Abu Ghurra	58.6143	15000000	11.6667	4.725e+08
Egypt	Kurkur Naqb Dungul	58.7789	500000	15.8333	2.1375e+07
Egypt	Wadi Abu Ghurra	58.7857	33000000	11.6667	1.0395e+09
Egypt	Kurkur Naqb Dungul	58.8421	5000000	15.8333	2.1375e+08
Egypt	Wadi Abu Ghurra	58.8714	25000000	11.6667	7.875e+08
Egypt	Kurkur Naqb Dungul	58.9368	4000000	15.8333	1.71e+08
Egypt	Kurkur Naqb Dungul	59	4000000	15.8333	1.71e+08
Egypt	Wadi Abu Ghurra	59	45000000	11.6667	1.4175e+09
Egypt	Kurkur Naqb Dungul	59.0947	20000000	15.8333	8.55e+08
Egypt	Kurkur Naqb Dungul	59.1579	4000000	15.8333	1.71e+08
Egypt	Wadi Abu Ghurra	59.1818	15000000	11	445500000
Egypt	Kurkur Naqb Dungul	59.2211	10000000	15.8333	4.275e+08
Egypt	Kurkur Naqb Dungul	59.2842	25000000	15.8333	1.06875e+09
Egypt	Wadi Abu Ghurra	59.3636	18000000	11	5.346e+08
Egypt	Wadi Abu Ghurra	59.4545	33000000	11	9.801e+08
Egypt	Wadi Abu Ghurra	59.5	18000000	11	5.346e+08
Egypt	Qreiya 3	61.26	4000000000	12	1.296e+11
Egypt	Qreiya 3	61.3808	4000000000	12	1.296e+11
Egypt	Qreiya 3	61.4267	3000000000	12	9.72e+10
Egypt	Qreiya 3	61.46	4000000000	12	1.296e+11
Egypt	Qreiya 1	61.51	626852519	12.4359	2.10478e+10
Egypt	Qreiya 3	61.51	2000000000	12	6.48e+10
Egypt	Qreiya 3	61.5433	3000000000	12	9.72e+10
Egypt	Qreiya 1	61.5502	982209044	12.4359	3.29796e+10
Egypt	Qreiya 1	61.5904	2599681021	12.4359	8.72893e+10
Egypt	Qreiya 3	61.5933	1000000000	12	3.24e+10
Egypt	Qreiya 3	61.61	3000000000	18.0147	1.45919e+11
Egypt	Qreiya 3	61.6211	4000000000	18.0147	1.94559e+11
Egypt	Qreiya 1	61.6306	2551329417	12.4359	8.56658e+10
Egypt	Qreiya 3	61.635	3000000000	18.0147	1.45919e+11
Egypt	Qreiya 3	61.6489	3000000000	18.0147	1.45919e+11
Egypt	Qreiya 3	61.6627	2000000000	18.0147	9.72794e+10
Egypt	Qreiya 1	61.6708	3849141082	12.4359	1.29242e+11
Egypt	Qreiya 3	61.6766	5000000000	18.0147	2.43199e+11
Egypt	Qreiya 3	61.6877	5000000000	18.0147	2.43199e+11
Egypt	Qreiya 3	61.7016	2000000000	18.0147	9.72794e+10
Egypt	Qreiya 1	61.711	2557565789	12.4359	8.58752e+10
Egypt	Qreiya 3	61.7155	2000000000	18.0147	9.72794e+10
Egypt	Qreiya 3	61.7293	2000000000	18.0147	9.72794e+10
Egypt	Araas	61.7393	2.76615e+09	18.2813	1.36536e+11
Egypt	Qreiya 3	61.7404	2000000000	18.0147	9.72794e+10
Egypt	Qreiya 1	61.7512	3955696203	12.4359	1.3282e+11
Egypt	Qreiya 3	61.7543	3000000000	18.0147	1.45919e+11
Egypt	Qreiya 3	61.7682	2000000000	18.0147	9.72794e+10
Egypt	Qreiya 3	61.7821	4000000000	18.0147	1.94559e+11
Egypt	Qreiya 1	61.7914	4517543860	12.4359	1.51685e+11
Egypt	Qreiya 3	61.7932	1000000000	18.0147	4.86397e+10
Egypt	Araas	61.794	2.08037e+09	18.2813	1.02686e+11
Egypt	Qreiya 3	61.8071	3000000000	18.0147	1.45919e+11
Egypt	Qreiya 3	61.8209	2000000000	18.0147	9.72794e+10
Egypt	Qreiya 1	61.8316	2703875072	12.4359	9.07878e+10
Egypt	Qreiya 3	61.832	3000000000	18.0147	1.45919e+11
Egypt	Qreiya 1	61.8397	2067669173	12.4359	6.9426e+10
Egypt	Qreiya 3	61.8459	1000000000	18.0147	4.86397e+10
Egypt	Araas	61.8487	2.65232e+09	18.2813	1.30918e+11
Egypt	Qreiya 1	61.8558	66211201	12.4359	2.22317e+09
Egypt	Qreiya 3	61.8598	900000000	18.0147	4.37757e+10
Egypt	Araas	61.8678	2.32647e+08	18.2813	1.14834e+10
Egypt	Qreiya 1	61.8678	1685855263	12.4359	5.66058e+10
Egypt	Qreiya 3	61.8764	600000000	18.0147	2.91838e+10
Egypt	Araas	61.8815	2.63158e+09	18.2813	1.29894e+11
Egypt	Qreiya 3	61.882	1000000000	18.0147	4.86397e+10
Egypt	Qreiya 1	61.8879	1707946336	12.4359	5.73476e+10
Egypt	Qreiya 3	61.8931	3000000000	18.0147	1.45919e+11
Egypt	Qreiya 3	61.8987	3000000000	18.0147	1.45919e+11
Egypt	Qreiya 3	61.9014	700000000	18.0147	3.40478e+10
Egypt	Araas	61.9034	2.2903e+09	18.2813	1.13049e+11
Egypt	Qreiya 3	61.9042	1000000000	18.0147	4.86397e+10
Egypt	Qreiya 3	61.907	10000000	18.0147	4.86397e+08
Egypt	Qreiya 3	61.9098	10000000	18.0147	4.86397e+08
Egypt	Qreiya 3	61.9125	300000000	18.0147	1.45919e+10
Egypt	Qreiya 3	61.9153	50000000	18.0147	2.43199e+09
Egypt	Qreiya 3	61.9236	20000000	18.0147	9.72794e+08
Egypt	Qreiya 3	61.9253	90000000	18.0147	4.37757e+09
Egypt	Qreiya 3	61.9264	200000000	18.0147	9.72794e+09
Egypt	Qreiya 1	61.9281	3139097744	12.4359	1.05401e+11
Egypt	Araas	61.9307	3.85471e+09	18.2813	1.90267e+11
Egypt	Qreiya 3	61.932	400000000	18.0147	1.94559e+10
Egypt	Qreiya 3	61.9347	100000000	18.0147	4.86397e+09
Egypt	Qreiya 3	61.9375	200000000	18.0147	9.72794e+09
Egypt	Qreiya 3	61.9542	400000000	18.0147	1.94559e+10
Egypt	Araas	61.9581	2.2771e+09	18.2813	1.12397e+11
Egypt	Duwi	61.9676	710535665	12.0503	2.31178e+10
Egypt	Qreiya 1	61.9764	1597602604	12.4359	5.36426e+10
Egypt	Qreiya 3	61.9819	3000000000	18.0147	1.45919e+11
Egypt	Duwi	61.9842	994860903	12.0503	3.23686e+10
Egypt	Araas	61.9854	1.94604e+09	18.2813	9.60559e+10
Egypt	Qreiya 3	61.9958	4000000000	18.0147	1.94559e+11
Egypt	Qreiya 1	62.0005	1196172249	12.4359	4.01638e+10
Egypt	Duwi	62.0008	1068376068	12.0503	3.47604e+10
Egypt	Qreiya 3	62.0097	1000000000	18.0147	4.86397e+10
Egypt	Araas	62.0128	4.88304e+09	18.2813	2.41025e+11
Egypt	Duwi	62.0133	1033884949	12.0503	3.36383e+10
Egypt	Qreiya 1	62.0166	2844950213	12.4359	9.55247e+10
Egypt	Duwi	62.0174	679669031	12.0503	2.21136e+10
Egypt	Araas	62.0183	2.67173e+09	18.2813	1.31876e+11
Egypt	Qreiya 3	62.0208	7000000000	18.0147	3.40478e+11
Egypt	Araas	62.021	2.3783e+09	18.2813	1.17392e+11
Egypt	Duwi	62.0216	307757322	12.0503	1.00131e+10
Egypt	Araas	62.0237	3.03929e+09	18.2813	1.50018e+11
Egypt	Duwi	62.0257	2183331223	12.0503	7.10364e+10
Egypt	Araas	62.0265	1.63729e+09	18.2813	8.08162e+10
Egypt	Araas	62.0276	6.48629e+06	18.2813	3.20161e+08
Egypt	Qreiya 1	62.0287	1755112720	12.4359	5.89313e+10
Egypt	Duwi	62.0299	2361687858	12.0503	7.68394e+10
Egypt	Araas	62.0308	5.34539e+07	18.2813	2.63847e+09
Egypt	Qreiya 1	62.0311	10092703	12.4359	3.38882e+08
Egypt	Qreiya 1	62.0335	401155	12.4359	1.34696e+07
Egypt	Duwi	62.034	161272069	12.0503	5.24711e+09
Egypt	Qreiya 1	62.0343	165492097	12.4359	5.55672e+09
Egypt	Araas	62.0347	4.59625e+07	18.2813	2.26869e+09
Egypt	Araas	62.0347	2.11146e+08	18.2813	1.04221e+10
Egypt	Araas	62.0363	4.44176e+08	18.2813	2.19243e+10
Egypt	Qreiya 3	62.0374	6000000000	18.0147	2.91838e+11
Egypt	Araas	62.038	3.48474e+09	18.2813	1.72005e+11
Egypt	Duwi	62.0382	1995613381	12.0503	6.49288e+10
Egypt	Araas	62.039	1.65186e+08	18.2813	8.1535e+09
Egypt	Qreiya 1	62.0391	12280702	12.4359	4.12348e+08
Egypt	Araas	62.0401	7.495e+06	18.2813	3.69951e+08
Egypt	Qreiya 1	62.0407	9954986	12.4359	3.34258e+08
Egypt	Duwi	62.0423	1256552575	12.0503	4.08829e+10
Egypt	Qreiya 1	62.0423	998590226	12.4359	3.35296e+10
Egypt	Araas	62.0423	6.74764e+06	18.2813	3.33061e+08
Egypt	Duwi	62.0465	2247237341	12.0503	7.31156e+10
Egypt	Qreiya 1	62.0472	1108235535	12.4359	3.72111e+10
Egypt	Araas	62.0483	1.17746e+09	18.2813	5.81191e+10
Egypt	Qreiya 3	62.0485	3000000000	18.0147	1.45919e+11
Egypt	Duwi	62.0506	2608353034	12.0503	8.48648e+10
Egypt	Araas	62.0511	1.25649e+09	18.2813	6.20197e+10
Egypt	Araas	62.0538	1.2594e+09	18.2813	6.21634e+10
Egypt	Araas	62.0566	1.57361e+09	18.2813	7.7673e+10
Egypt	Qreiya 1	62.0568	1585958073	12.4359	5.32516e+10
Egypt	Qreiya 3	62.0624	3000000000	18.0147	1.45919e+11
Egypt	Duwi	62.0672	2521171859	12.0503	8.20283e+10
Egypt	Qreiya 1	62.0729	2018745494	12.4359	6.77833e+10
Egypt	Qreiya 3	62.0763	2000000000	18.0147	9.72794e+10
Egypt	Duwi	62.0838	2666781987	12.0503	8.67658e+10
Egypt	Qreiya 1	62.089	3082706767	12.4359	1.03508e+11
Egypt	Qreiya 3	62.0902	2000000000	18.0147	9.72794e+10
Egypt	Qreiya 3	62.104	3000000000	18.0147	1.45919e+11
Egypt	Qreiya 3	62.1151	1000000000	18.0147	4.86397e+10
Egypt	Duwi	62.117	1574448943	12.0503	5.12259e+10
Egypt	Qreiya 3	62.129	2000000000	18.0147	9.72794e+10
Egypt	Qreiya 1	62.1292	2195220193	12.4359	7.37087e+10
Egypt	Qreiya 3	62.1429	2000000000	18.0147	9.72794e+10
Egypt	Duwi	62.1502	2108270494	12.0503	6.85942e+10
Egypt	Qreiya 3	62.154	1000000000	18.0147	4.86397e+10
Egypt	Qreiya 1	62.1694	2308524208	12.4359	7.75131e+10
Egypt	Qreiya 3	62.1707	1000000000	18.0147	4.86397e+10
Egypt	Qreiya 3	62.1818	1000000000	18.0147	4.86397e+10
Egypt	Duwi	62.1834	1114488349	12.0503	3.62607e+10
Egypt	Qreiya 3	62.1956	2000000000	18.0147	9.72794e+10
Egypt	Qreiya 3	62.2095	1000000000	18.0147	4.86397e+10
Egypt	Qreiya 1	62.2096	1759937819	12.4359	5.90933e+10
Egypt	Duwi	62.2166	778303565	12.0503	2.53227e+10
Egypt	Qreiya 3	62.2234	3000000000	18.0147	1.45919e+11
Egypt	Qreiya 3	62.2373	2000000000	18.0147	9.72794e+10
Egypt	Qreiya 3	62.2484	2000000000	18.0147	9.72794e+10
Egypt	Duwi	62.2498	1256985300	12.0503	4.0897e+10
Egypt	Qreiya 1	62.2498	2137826962	12.4359	7.17817e+10
Egypt	Qreiya 3	62.2622	2000000000	18.0147	9.72794e+10
Egypt	Qreiya 3	62.2761	700000000	18.0147	3.40478e+10
Egypt	Duwi	62.283	1592587776	12.0503	5.18161e+10
Egypt	Qreiya 3	62.29	1000000000	18.0147	4.86397e+10
Egypt	Qreiya 1	62.29	2287449393	12.4359	7.68055e+10
Egypt	Qreiya 3	62.3039	3000000000	18.0147	1.45919e+11
Egypt	Qreiya 3	62.315	2000000000	18.0147	9.72794e+10
Egypt	Duwi	62.3162	1178576860	12.0503	3.83459e+10
Egypt	Qreiya 1	62.3302	1304511278	12.4359	4.38015e+10
Egypt	Qreiya 3	62.3316	2000000000	18.0147	9.72794e+10
Egypt	Qreiya 3	62.3427	1000000000	18.0147	4.86397e+10
Egypt	Qreiya 3	62.3566	1000000000	18.0147	4.86397e+10
Egypt	Qreiya 1	62.3704	1896829896	12.4359	6.36897e+10
Egypt	Qreiya 3	62.3705	2000000000	18.0147	9.72794e+10
Egypt	Wadi Abu Ghurra	64.9	5000000	0.909091	1.22727e+07
Egypt	Wadi Abu Ghurra	66	15000000	0.909091	3.68182e+07
North Atlantic	DSDP549	67	6580000000	3.5	6.2181e+10
North Atlantic	DSDP549	68.4677	6470000000	3.5	6.11415e+10
North Atlantic	DSDP549	69.91	5130000000	3.5	48478500000
Germany	Kronsmoor	71.0905	690000000	22.5	41917500000
Germany	Kronsmoor	71.1016	2.11e+09	22.5	1.28182e+11
Germany	Kronsmoor	71.1127	1020000000	22.5	6.1965e+10
Germany	Kronsmoor	71.1238	1140000000	22.5	69255000000
Germany	Kronsmoor	71.135	770000000	22.5	46777500000
Germany	Kronsmoor	71.1461	960000000	22.5	5.832e+10
Germany	Kronsmoor	71.1572	1970000000	22.5	1.19678e+11
Germany	Kronsmoor	71.1683	1210000000	22.5	73507500000
Germany	Kronsmoor	71.1794	660000000	22.5	40095000000
Germany	Kronsmoor	71.1867	1550000000	22.5	94162500000
Germany	Kronsmoor	71.1941	1940000000	22.5	1.17855e+11
Germany	Kronsmoor	71.2014	1750000000	22.5	106312500000
Germany	Kronsmoor	71.2088	1390000000	22.5	84442500000
Germany	Kronsmoor	71.2161	1960000000	22.5	1.1907e+11
Germany	Kronsmoor	71.2235	2290000000	22.5	139117500000
Germany	Kronsmoor	71.2309	2170000000	22.5	1.31828e+11
Germany	Kronsmoor	71.2382	1340000000	22.5	81405000000
Germany	Kronsmoor	71.2456	2150000000	22.5	1.30613e+11
Germany	Kronsmoor	71.2529	1460000000	22.5	88695000000
Germany	Kronsmoor	71.2603	2950000000	22.5	179212500000
Germany	Kronsmoor	71.2677	1460000000	22.5	88695000000
Germany	Kronsmoor	71.275	2000000000	22.5	1.215e+11
Germany	Kronsmoor	71.2824	3260000000	22.5	198045000000
Germany	Kronsmoor	71.2897	1550000000	22.5	94162500000
Germany	Kronsmoor	71.2971	1600000000	22.5	97200000000
Germany	Kronsmoor	71.3045	1730000000	22.5	105097500000
Germany	Kronsmoor	71.3118	2830000000	22.5	171922500000
Germany	Kronsmoor	71.3192	1740000000	22.5	105705000000
Germany	Kronsmoor	71.3265	1080000000	22.5	6.561e+10
Germany	Kronsmoor	71.3339	1360000000	22.5	82620000000
Germany	Kronsmoor	71.3413	1540000000	22.5	93555000000
Germany	Kronsmoor	71.3486	1200000000	22.5	72900000000
Germany	Kronsmoor	71.356	1610000000	22.5	97807500000
Germany	Kronsmoor	71.3633	1080000000	22.5	6.561e+10
Germany	Kronsmoor	71.3707	1750000000	22.5	106312500000
Germany	Kronsmoor	71.3781	1080000000	22.5	6.561e+10
Germany	Kronsmoor	71.3854	1580000000	22.5	95985000000
Germany	Kronsmoor	71.3928	1290000000	22.5	78367500000
Germany	Kronsmoor	71.4001	1490000000	22.5	90517500000
Germany	Kronsmoor	71.4075	1320000000	22.5	80190000000
Germany	Kronsmoor	71.4149	1500000000	22.5	91125000000
Germany	Kronsmoor	71.4222	1340000000	22.5	81405000000
Germany	Kronsmoor	71.4296	2.09e+09	22.5	1.26967e+11
Germany	Kronsmoor	71.4369	1290000000	22.5	78367500000
Germany	Kronsmoor	71.4443	1570000000	22.5	95377500000
Germany	Kronsmoor	71.4517	900000000	22.5	54675000000
Germany	Kronsmoor	71.459	1000000000	22.5	6.075e+10
Germany	Kronsmoor	71.4664	1520000000	22.5	92340000000
Germany	Kronsmoor	71.4737	1240000000	22.5	75330000000
Germany	Kronsmoor	71.4811	1180000000	22.5	71685000000
Germany	Kronsmoor	71.4885	990000000	22.5	6.01425e+10
Germany	Kronsmoor	71.494	1410000000	30	114210000000
Germany	Kronsmoor	71.4995	1580000000	30	1.2798e+11
Germany	Kronsmoor	71.505	1360000000	30	110160000000
Germany	Kronsmoor	71.5105	1510000000	30	1.2231e+11
Germany	Kronsmoor	71.5161	1080000000	30	87480000000
Germany	Kronsmoor	71.5216	1230000000	30	99630000000
Germany	Kronsmoor	71.5271	1110000000	30	89910000000
Germany	Kronsmoor	71.5326	1440000000	30	1.1664e+11
Germany	Kronsmoor	71.5381	2450000000	30	198450000000
Germany	Kronsmoor	71.5437	1530000000	30	1.2393e+11
Germany	Kronsmoor	71.5492	1490000000	30	1.2069e+11
Germany	Kronsmoor	71.5547	1760000000	30	142560000000
Germany	Kronsmoor	71.5602	1670000000	30	1.3527e+11
Germany	Kronsmoor	71.5657	1160000000	30	93960000000
Germany	Kronsmoor	71.5713	790000000	30	6.399e+10
Germany	Kronsmoor	71.5768	2770000000	30	224370000000
Germany	Kronsmoor	71.5823	1840000000	30	149040000000
Germany	Kronsmoor	71.5878	1870000000	30	151470000000
Germany	Kronsmoor	71.5933	1430000000	30	115830000000
Germany	Kronsmoor	71.5989	2640000000	30	213840000000
Germany	Kronsmoor	71.6044	2210000000	30	179010000000
Germany	Kronsmoor	71.6099	2660000000	30	215460000000
Germany	Kronsmoor	71.6154	1330000000	30	107730000000
Germany	Kronsmoor	71.6209	1580000000	30	1.2798e+11
Germany	Kronsmoor	71.6265	1780000000	30	144180000000
Germany	Kronsmoor	71.632	2020000000	30	163620000000
Germany	Kronsmoor	71.6375	1770000000	30	143370000000
Germany	Kronsmoor	71.643	2180000000	30	176580000000
Germany	Kronsmoor	71.6485	1530000000	30	1.2393e+11
Germany	Kronsmoor	71.6541	1380000000	30	111780000000
Germany	Kronsmoor	71.6596	1650000000	30	1.3365e+11
Germany	Kronsmoor	71.6651	2100000000	30	170100000000
Germany	Kronsmoor	71.6706	2540000000	30	205740000000
Germany	Kronsmoor	71.6761	1400000000	30	113400000000
Germany	Kronsmoor	71.6817	1280000000	30	103680000000
Germany	Kronsmoor	71.69	1280000000	30	103680000000
Germany	Kronsmoor	71.6983	2115000000	30	171315000000
Germany	Kronsmoor	71.7067	2245000000	30	181845000000
Germany	Kronsmoor	71.715	1290000000	30	104490000000
Germany	Kronsmoor	71.7233	1460000000	30	1.1826e+11
Germany	Kronsmoor	71.7317	1660000000	30	1.3446e+11
Germany	Kronsmoor	71.74	1760000000	30	142560000000
Germany	Kronsmoor	71.7483	2430000000	30	196830000000
Germany	Kronsmoor	71.7567	1090000000	30	88290000000
Germany	Kronsmoor	71.765	2220000000	30	179820000000
Germany	Kronsmoor	71.7733	2380000000	30	192780000000
Germany	Kronsmoor	71.7817	1170000000	30	94770000000
Germany	Kronsmoor	71.79	1080000000	30	87480000000
Germany	Kronsmoor	71.7983	1520000000	30	1.2312e+11
Germany	Kronsmoor	71.8067	1800000000	30	145800000000
Germany	Kronsmoor	71.815	1355000000	30	109755000000
Germany	Kronsmoor	71.8233	1635000000	30	1.32435e+11
Germany	Kronsmoor	71.8317	1245000000	30	100845000000
Germany	Kronsmoor	71.84	950000000	30	76950000000
Germany	Kronsmoor	71.8483	1190000000	30	96390000000
Germany	Kronsmoor	71.8567	995000000	30	80595000000
Germany	Kronsmoor	71.865	1665000000	30	1.34865e+11
Germany	Kronsmoor	71.8733	1290000000	30	104490000000
Germany	Kronsmoor	71.8817	1530000000	30	1.2393e+11
Germany	Kronsmoor	71.89	1520000000	30	1.2312e+11
Germany	Kronsmoor	71.9	990000000	25	6.6825e+10
Germany	Kronsmoor	71.91	950000000	25	6.4125e+10
Germany	Kronsmoor	71.92	850000000	25	57375000000
Germany	Kronsmoor	71.93	670000000	25	45225000000
Germany	Kronsmoor	71.94	1030000000	25	69525000000
Germany	Kronsmoor	71.95	1360000000	25	91800000000
Germany	Kronsmoor	71.96	1540000000	25	103950000000
Germany	Kronsmoor	71.97	1270000000	25	85725000000
Germany	Kronsmoor	71.98	740000000	25	49950000000
Germany	Kronsmoor	71.99	1100000000	25	74250000000
Germany	Kronsmoor	71.992	2290000000	25	154575000000
Germany	Kronsmoor	72	830000000	25	56025000000
Germany	Kronsmoor	72.01	580000000	25	39150000000
Germany	Kronsmoor	72.02	840000000	25	56700000000
Germany	Kronsmoor	72.03	2.11e+09	25	142425000000
Germany	Kronsmoor	72.0416	1900000000	25	1.2825e+11
North Atlantic	DSDP549	72.05	8870000000	3.5	83821500000
Germany	Kronsmoor	72.0532	2750000000	25	185625000000
Germany	Kronsmoor	72.0648	1870000000	25	1.26225e+11
Germany	Kronsmoor	72.0768	2150000000	25	145125000000
Germany	Kronsmoor	72.0884	1370000000	25	92475000000
Germany	Kronsmoor	72.1	2280000000	25	153900000000
Germany	Kronsmoor	72.1116	2900000000	25	195750000000
Germany	Kronsmoor	72.1232	2650000000	25	178875000000
Germany	Kronsmoor	72.1348	2.01e+09	25	1.35675e+11
Germany	Kronsmoor	72.1468	1470000000	25	99225000000
Germany	Kronsmoor	72.1584	1800000000	25	1.215e+11
Germany	Kronsmoor	72.17	2330000000	25	157275000000
Germany	Kronsmoor	72.1816	2150000000	25	145125000000
Germany	Kronsmoor	72.1932	2680000000	25	180900000000
Germany	Kronsmoor	72.2048	2400000000	25	162000000000
Germany	Kronsmoor	72.2168	1330000000	25	89775000000
Germany	Kronsmoor	72.2284	2580000000	25	174150000000
Germany	Kronsmoor	72.24	2.03e+09	25	1.37025e+11
Germany	Kronsmoor	72.2516	1530000000	25	103275000000
Germany	Kronsmoor	72.2632	2190000000	25	147825000000
Germany	Kronsmoor	72.2748	1440000000	25	97200000000
North Atlantic	DSDP549	72.2817	6630000000	3.5	6.26535e+10
Germany	Kronsmoor	72.2868	1520000000	25	102600000000
North Atlantic	DSDP549	72.4972	10010000000	3.5	94594500000
North Atlantic	DSDP549	72.7493	8730000000	3.5	82498500000
North Atlantic	DSDP549	72.9811	7100000000	3.5	6.7095e+10
North Atlantic	DSDP549	73.2169	8270000000	3.5	78151500000
North Atlantic	DSDP549	73.4567	9470000000	3.5	89491500000
North Atlantic	DSDP549	73.7048	10180000000	3.5	96201000000
North Atlantic	DSDP549	73.904	8670000000	3.5	81931500000
North Atlantic	DSDP549	74.0951	3100000000	3.5	2.9295e+10
North Atlantic	DSDP549	75.2091	6150000000	3.5	5.81175e+10
North Atlantic	DSDP549	75.4489	7010000000	3.5	6.62445e+10
North Atlantic	DSDP549	75.6766	5860000000	3.5	55377000000
North Atlantic	DSDP549	75.9124	5350000000	3.5	50557500000
North Atlantic	DSDP549	76.1442	7100000000	3.5	6.7095e+10
North Atlantic	DSDP549	76.38	6720000000	3.5	6.3504e+10
North Atlantic	DSDP549	77.8254	6180000000	3.5	5.8401e+10
North Atlantic	DSDP549	79.22	9240000000	3.5	87318000000
North Atlantic	DSDP549	80.64	7500000000	3.5	70875000000
North Atlantic	DSDP549	81.0723	9260000000	3.5	87507000000
North Atlantic	DSDP549	81.2492	6390000000	3.5	6.03855e+10
North Atlantic	DSDP549	81.6422	8890000000	3.5	84010500000
North Atlantic	DSDP549	82.0352	7000000000	3.5	6.615e+10
North Atlantic	DSDP549	83.64	6510000000	3.5	6.15195e+10
North Atlantic	DSDP549	83.9191	7450000000	3.5	70402500000
North Atlantic	DSDP549	84.1272	7000000000	3.5	6.615e+10
North Atlantic	DSDP549	84.3961	7670000000	3.5	72481500000
North Atlantic	DSDP549	84.6346	6670000000	3.5	6.30315e+10
North Atlantic	DSDP549	84.8883	6380000000	3.5	6.0291e+10
North Atlantic	DSDP549	85.1167	5260000000	3.5	49707000000
North Atlantic	DSDP549	85.3704	6310000000	3.5	5.96295e+10
North Atlantic	DSDP549	85.6089	7070000000	3.5	6.68115e+10
England	Holywell Pinnacle	87.972	1570000000	1.31579	5.57763e+09
England	Holywell Pinnacle	88.048	1060000000	1.31579	3.76579e+09
England	Holywell Pinnacle	88.39	850000000	1.31579	3.01974e+09
North Atlantic	DSDP549	88.5521	5530000000	3.5	52258500000
North Atlantic	DSDP549	88.7348	5270000000	3.5	49801500000
England	Holywell Pinnacle	88.922	2390000000	1.31579	8.49079e+09
North Atlantic	DSDP549	88.9479	7670000000	3.5	72481500000
England	Holywell Pinnacle	89.112	1390000000	1.31579	4.93816e+09
North Atlantic	DSDP549	89.1154	5170000000	3.5	48856500000
North Atlantic	DSDP549	89.364	4050000000	3.5	38272500000
North Atlantic	DSDP549	89.567	3820000000	3.5	36099000000
England	Holywell Pinnacle	89.568	1900000000	1.31579	6.75e+09
North Atlantic	DSDP549	89.77	2830000000	3.5	26743500000
England	Holywell Pinnacle	90.556	710000000	1.31579	2.52237e+09
England	Holywell Pinnacle	90.784	600000000	1.31579	2.13158e+09
England	Holywell Pinnacle	91.24	960000000	1.31579	3.41053e+09
England	Holywell Pinnacle	91.544	750000000	1.31579	2.66447e+09
England	Holywell Pinnacle	91.924	840000000	1.31579	2.98421e+09
Central Atlantic	ODP1258A	92.1511	1.75043e+08	3	1.41785e+09
Central Atlantic	ODP1258A	92.2184	1.01177e+08	3	8.19534e+08
Germany	Wunstorf	92.2875	460000000	34	42228000000
England	Holywell Pinnacle	92.304	1590000000	1.31579	5.64868e+09
Germany	Wunstorf	92.3375	2170000000	34	199206000000
Germany	Wunstorf	92.3875	1010000000	34	92718000000
Central Atlantic	ODP1258A	92.4291	6.98088e+07	3	5.65452e+08
Germany	Wunstorf	92.4375	1230000000	34	112914000000
Germany	Wunstorf	92.4995	1640000000	32.5	143910000000
Germany	Wunstorf	92.5495	690000000	32.5	6.05475e+10
Germany	Wunstorf	92.5995	480000000	32.5	42120000000
Central Atlantic	ODP1258A	92.6085	6.64615e+07	3	5.38338e+08
Germany	Wunstorf	92.6495	1980000000	32.5	173745000000
Germany	Wunstorf	92.6995	1350000000	33	1.20285e+11
Germany	Wunstorf	92.7495	1560000000	33	138996000000
England	Holywell Pinnacle	92.76	960000000	1.31579	3.41053e+09
Central Atlantic	ODP1258A	92.7655	1.88023e+08	3	1.52299e+09
Germany	Wunstorf	92.799	1080000000	33	9.6228e+10
North Atlantic	DSDP549	92.8269	6930000000	3.5	6.54885e+10
Germany	Wunstorf	92.849	1830000000	39.5	195169500000
North Atlantic	DSDP549	92.8623	6190000000	3.5	5.84955e+10
North Atlantic	DSDP549	92.8978	3630000000	3.5	3.43035e+10
Central Atlantic	ODP1258A	92.9	1.17434e+08	3	9.51219e+08
Germany	Wunstorf	92.9	1140000000	39.5	1.21581e+11
Germany	Wunstorf	92.949	1560000000	39.5	166374000000
Germany	Wunstorf	92.9995	1.07e+09	39.5	1.14116e+11
Central Atlantic	ODP1260A	93.0005	1.30492e+09	8.4	2.95955e+10
Central Atlantic	ODP1258A	93.039	1.3526e+08	3	1.09561e+09
Germany	Wunstorf	93.0495	650000000	35	6.1425e+10
Central Atlantic	ODP1260A	93.055	1.10392e+08	8.4	2.5037e+09
Germany	Wunstorf	93.102	660000000	35	6.237e+10
Central Atlantic	ODP1258A	93.1063	1.84725e+08	3	1.49628e+09
Germany	Wunstorf	93.1505	560000000	35	52920000000
Central Atlantic	ODP1260A	93.1641	3.83362e+07	8.4	8.69466e+08
England	Holywell Pinnacle	93.178	3680000000	1.31579	1.30737e+10
Germany	Wunstorf	93.2025	760000000	27.5	56430000000
Germany	Wunstorf	93.2515	1220000000	27.5	90585000000
England	Holywell Pinnacle	93.254	2330000000	1.31579	8.27763e+09
Central Atlantic	ODP1258A	93.2857	2.1403e+08	3	1.73365e+09
Germany	Wunstorf	93.3015	1.07e+09	27.5	7.94475e+10
Germany	Wunstorf	93.35	1810000000	32.5	158827500000
England	Holywell Pinnacle	93.368	3250000000	1.31579	1.15461e+10
Central Atlantic	ODP1258A	93.3978	1.68815e+08	3	1.3674e+09
Germany	Wunstorf	93.3994	2810000000	32.5	2.46578e+11
Germany	Wunstorf	93.4118	4700000000	32.5	412425000000
Germany	Wunstorf	93.4438	2780000000	32.5	2.43945e+11
Germany	Wunstorf	93.4539	1300000000	32.5	114075000000
Central Atlantic	ODP1258A	93.465	2.157e+08	3	1.74717e+09
Germany	Wunstorf	93.4886	1510000000	32.5	1.32503e+11
North Atlantic	DSDP551	93.4958	8.36e+09	3.5	79002000000
England	Holywell Pinnacle	93.52	2580000000	1.31579	9.16579e+09
North Atlantic	DSDP551	93.5235	5770000000	3.5	54526500000
Germany	Wunstorf	93.5344	3220000000	32.5	282555000000
Central Atlantic	ODP1260A	93.5348	4.48728e+08	8.4	1.01771e+10
North Atlantic	DSDP551	93.5456	4820000000	3.5	45549000000
Germany	Wunstorf	93.55	2100000000	32.5	184275000000
Central Atlantic	ODP1260B	93.5729	7.45441e+08	8.4	1.69066e+10
North Atlantic	DSDP551	93.5733	10360000000	3.5	97902000000
Central Atlantic	ODP1258A	93.5771	7.0291e+07	3	5.69357e+08
Germany	Wunstorf	93.5811	2320000000	32.5	203580000000
North Atlantic	DSDP551	93.601	7770000000	3.5	73426500000
Germany	Wunstorf	93.6273	1530000000	32.5	1.34258e+11
North Atlantic	DSDP551	93.6298	9210000000	3.5	87034500000
North Atlantic	DSDP551	93.6564	9110000000	3.5	86089500000
Germany	Wunstorf	93.6721	2370000000	30	191970000000
Central Atlantic	ODP1260B	93.6819	4.79819e+08	8.4	1.08823e+10
North Atlantic	DSDP551	93.6841	5410000000	3.5	51124500000
Germany	Wunstorf	93.6982	3520000000	30	285120000000
England	Holywell Pinnacle	93.71	1720000000	1.31579	6.11053e+09
North Atlantic	DSDP551	93.7117	3180000000	3.5	3.0051e+10
Germany	Wunstorf	93.7165	2310000000	30	187110000000
North Atlantic	DSDP551	93.7173	1980000000	3.5	18711000000
North Atlantic	DSDP551	93.7228	60000000	3.5	567000000
Central Atlantic	ODP1258A	93.743	2.17067e+08	3	1.75824e+09
Germany	Wunstorf	93.7449	1750000000	30	141750000000
Germany	Wunstorf	93.7641	1310000000	30	106110000000
Germany	Wunstorf	93.7774	1860000000	30	150660000000
Central Atlantic	ODP1258A	93.7879	3.44989e+08	3	2.79441e+09
Central Atlantic	ODP1260B	93.791	3.28e+08	8.4	7.43904e+09
Germany	Wunstorf	93.8094	2250000000	34	206550000000
Germany	Wunstorf	93.8195	3110000000	34	285498000000
Germany	Wunstorf	93.8323	1920000000	34	176256000000
Germany	Wunstorf	93.8428	2720000000	34	2.49696e+11
Germany	Wunstorf	93.8538	2240000000	34	205632000000
Germany	Wunstorf	93.8844	2280000000	34	209304000000
North Atlantic	DSDP549	93.8889	3600000000	3.5	3.402e+10
Central Atlantic	ODP1258A	93.9	2.19481e+08	3	1.7778e+09
North Atlantic	DSDP549	93.9	2270000000	3.5	21451500000
Central Atlantic	ODP1260B	93.9	3.06828e+08	8.4	6.95886e+09
England	Holywell Pinnacle	93.9	1270000000	1.31579	4.51184e+09
England	Holywell Pinnacle	93.9	4150000000	10	112050000000
Germany	Wunstorf	93.9	2930000000	34	2.68974e+11
Central Atlantic	ODP1258A	93.9106	1.79882e+08	10	4.85682e+09
England	Holywell Pinnacle	93.92	1330000000	10	35910000000
Germany	Wunstorf	93.9214	1800000000	34	165240000000
Germany	Wunstorf	93.9351	1050000000	34	96390000000
England	Holywell Pinnacle	93.94	4220000000	10	113940000000
Germany	Wunstorf	93.952	1830000000	34	167994000000
Central Atlantic	ODP1258A	93.9638	2.7079e+08	10	7.31134e+09
England	Holywell Pinnacle	93.965	730000000	10	19710000000
Germany	Wunstorf	93.9713	1850000000	34	169830000000
Central Atlantic	ODP1258A	93.9744	1.27623e+08	10	3.44581e+09
England	Holywell Pinnacle	93.99	1260000000	10	3.402e+10
Germany	Wunstorf	93.9902	1580000000	34	145044000000
England	Holywell Pinnacle	93.995	1370000000	10	36990000000
Central Atlantic	ODP1260B	94.0009	1.01215e+09	2.5	6.83198e+09
Germany	Wunstorf	94.0036	380000000	34	34884000000
England	Holywell Pinnacle	94.01	3060000000	10	82620000000
England	Holywell Pinnacle	94.02	1940000000	10	52380000000
England	Holywell Pinnacle	94.025	2120000000	10	57240000000
Germany	Wunstorf	94.0257	540000000	34	49572000000
Germany	Wunstorf	94.0412	2260000000	34	207468000000
England	Holywell Pinnacle	94.05	1290000000	10	34830000000
Germany	Wunstorf	94.0601	1660000000	29.5	1.32219e+11
England	Holywell Pinnacle	94.075	1910000000	10	51570000000
Germany	Wunstorf	94.0756	730000000	29.5	5.81445e+10
Central Atlantic	ODP1260B	94.0908	1.47592e+08	2.5	9.96247e+08
Germany	Wunstorf	94.097	590000000	29.5	46993500000
England	Holywell Pinnacle	94.1	1670000000	10	45090000000
Germany	Wunstorf	94.1058	2860000000	29.5	227799000000
Germany	Wunstorf	94.1121	450000000	29.5	35842500000
Germany	Wunstorf	94.1205	1930000000	29.5	153724500000
England	Holywell Pinnacle	94.125	940000000	10	25380000000
Germany	Wunstorf	94.1338	3170000000	29.5	2.52491e+11
Germany	Wunstorf	94.1381	1340000000	29.5	106731000000
Germany	Wunstorf	94.15	2300000000	25	155250000000
England	Holywell Pinnacle	94.15	1130000000	10	3.051e+10
Germany	Wunstorf	94.1629	3270000000	25	220725000000
England	Holywell Pinnacle	94.1641	610000000	21.3333	3.5136e+10
England	Holywell Pinnacle	94.1734	450000000	21.3333	2.592e+10
Central Atlantic	ODP1258A	94.1764	1.66979e+08	10	4.50843e+09
England	Holywell Pinnacle	94.1852	1040000000	21.3333	5.9904e+10
England	Holywell Pinnacle	94.1875	1740000000	21.3333	1.00224e+11
Germany	Wunstorf	94.1904	1160000000	25	78300000000
England	Holywell Pinnacle	94.1922	720000000	21.3333	4.1472e+10
Central Atlantic	ODP1260B	94.1998	4.64885e+08	2.5	3.13797e+09
England	Holywell Pinnacle	94.2016	2160000000	21.3333	1.24416e+11
England	Holywell Pinnacle	94.2063	1160000000	21.3333	6.6816e+10
England	Holywell Pinnacle	94.218	880000000	21.3333	5.0688e+10
Central Atlantic	ODP1258A	94.2189	1.48658e+08	10	4.01377e+09
England	Holywell Pinnacle	94.2203	1870000000	21.3333	1.07712e+11
Germany	Wunstorf	94.2235	1200000000	25	81000000000
England	Holywell Pinnacle	94.2297	1980000000	21.3333	1.14048e+11
England	Holywell Pinnacle	94.2414	1530000000	21.3333	8.8128e+10
Central Atlantic	ODP1258A	94.2508	2.58327e+08	10	6.97482e+09
England	Holywell Pinnacle	94.2508	2940000000	21.3333	1.69344e+11
England	Holywell Pinnacle	94.2578	4010000000	21.3333	2.30976e+11
England	Holywell Pinnacle	94.2625	3310000000	21.3333	1.90656e+11
Germany	Wunstorf	94.2655	1510000000	25	101925000000
England	Holywell Pinnacle	94.2719	1810000000	21.3333	1.04256e+11
England	Holywell Pinnacle	94.2859	2760000000	21.3333	1.58976e+11
England	Holywell Pinnacle	94.2906	2630000000	21.3333	1.51488e+11
England	Holywell Pinnacle	94.3	3950000000	21.3333	2.2752e+11
Germany	Wunstorf	94.3043	2.09e+09	25	141075000000
England	Holywell Pinnacle	94.3169	3550000000	17.7778	1.704e+11
England	Holywell Pinnacle	94.3281	4210000000	17.7778	2.0208e+11
England	Holywell Pinnacle	94.345	4360000000	17.7778	2.0928e+11
Germany	Wunstorf	94.3479	2420000000	25	163350000000
England	Holywell Pinnacle	94.3619	1390000000	17.7778	6.672e+10
England	Holywell Pinnacle	94.3759	2720000000	17.7778	1.3056e+11
Germany	Wunstorf	94.3858	1500000000	31.5	1.27575e+11
England	Holywell Pinnacle	94.39	2280000000	17.7778	1.0944e+11
England	Holywell Pinnacle	94.4041	2800000000	17.7778	1.344e+11
Germany	Wunstorf	94.4052	780000000	31.5	6.6339e+10
England	Holywell Pinnacle	94.4181	2710000000	17.7778	1.3008e+11
Germany	Wunstorf	94.427	1770000000	31.5	150538500000
England	Holywell Pinnacle	94.4322	2580000000	17.7778	1.2384e+11
Germany	Wunstorf	94.4448	1640000000	31.5	139482000000
Germany	Wunstorf	94.4497	830000000	31.5	70591500000
England	Holywell Pinnacle	94.4575	3130000000	17.7778	1.5024e+11
England	Holywell Pinnacle	94.4716	3970000000	17.7778	1.9056e+11
Central Atlantic	ODP1260B	94.4724	3.94151e+08	2.5	2.66052e+09
Germany	Wunstorf	94.4803	610000000	31.5	5.18805e+10
England	Holywell Pinnacle	94.4856	2150000000	17.7778	1.032e+11
England	Holywell Pinnacle	94.4997	4280000000	17.7778	2.0544e+11
Germany	Wunstorf	94.5005	2560000000	31.5	2.17728e+11
England	Holywell Pinnacle	94.5138	5600000000	17.7778	2.688e+11
England	Holywell Pinnacle	94.5278	4320000000	17.7778	2.0736e+11
Germany	Wunstorf	94.5296	1520000000	31.5	1.29276e+11
England	Holywell Pinnacle	94.5419	5190000000	17.7778	2.4912e+11
Germany	Wunstorf	94.545	130000000	31.5	11056500000
England	Holywell Pinnacle	94.5559	6890000000	17.7778	3.3072e+11
England	Holywell Pinnacle	94.57	6140000000	17.7778	2.9472e+11
Germany	Wunstorf	94.57	280000000	31.5	2.3814e+10
Central Atlantic	ODP1258C	94.5803	4.34032e+08	10	1.17189e+10
Central Atlantic	ODP1260B	94.5814	1.71702e+09	2.5	1.15899e+10
Germany	Wunstorf	94.6036	1540000000	37.5	155925000000
England	Holywell Pinnacle	94.6262	3570000000	17.7778	1.7136e+11
Germany	Wunstorf	94.6473	2820000000	37.5	285525000000
England	Holywell Pinnacle	94.6825	2440000000	17.7778	1.1712e+11
Central Atlantic	ODP1260B	94.6905	4.33134e+09	2.5	2.92366e+10
Germany	Wunstorf	94.7009	1860000000	37.5	188325000000
Central Atlantic	ODP1258C	94.7185	2.84889e+08	10	7.692e+09
Germany	Wunstorf	94.7373	1840000000	37.5	186300000000
England	Holywell Pinnacle	94.7388	1820000000	17.7778	8.736e+10
Central Atlantic	ODP1260B	94.7668	4.67513e+09	1.76752	2.23111e+10
Germany	Wunstorf	94.7855	2740000000	40.5	299619000000
England	Holywell Pinnacle	94.795	3280000000	17.7778	1.5744e+11
Germany	Wunstorf	94.8309	2460000000	40.5	2.69001e+11
Central Atlantic	ODP1258B	94.8482	4.70118e+08	4.87898	6.19298e+09
England	Holywell Pinnacle	94.8513	2520000000	17.7778	1.2096e+11
Germany	Wunstorf	94.8768	1990000000	40.5	2.17606e+11
Central Atlantic	ODP1260B	94.8785	2.96476e+09	1.76752	1.41487e+10
England	Holywell Pinnacle	94.9075	2480000000	17.7778	1.1904e+11
North Atlantic	DSDP551	94.9161	6350000000	3.5	6.00075e+10
Germany	Wunstorf	94.9218	2430000000	40.5	2.6572e+11
Central Atlantic	ODP1260B	94.9276	3.33802e+09	1.76752	1.593e+10
Central Atlantic	ODP1258B	94.9343	1.07014e+08	4.87898	1.40972e+09
England	Holywell Pinnacle	94.9638	2320000000	17.7778	1.1136e+11
Germany	Wunstorf	94.9723	2270000000	30	183870000000
Central Atlantic	ODP1260B	94.9739	3.46784e+09	1.76752	1.65495e+10
North Atlantic	DSDP551	94.9836	11410000000	3.5	107824500000
Germany	Wunstorf	95.0159	4350000000	30	352350000000
England	Holywell Pinnacle	95.0284	2030000000	17.7778	9.744e+10
Central Atlantic	ODP1258B	95.0374	2.55117e+08	4.87898	3.36072e+09
North Atlantic	DSDP551	95.0546	10360000000	3.5	97902000000
Germany	Wunstorf	95.0582	2580000000	30	208980000000
England	Holywell Pinnacle	95.0847	2000000000	17.7778	9.6e+10
Germany	Wunstorf	95.1055	4200000000	27.5	311850000000
Central Atlantic	ODP1258B	95.1139	1.05902e+08	4.87898	1.39507e+09
North Atlantic	DSDP551	95.1238	9850000000	3.5	93082500000
England	Holywell Pinnacle	95.1409	1700000000	17.7778	8.16e+10
Germany	Wunstorf	95.1491	2980000000	27.5	221265000000
Central Atlantic	ODP1258B	95.1543	2.76378e+08	4.87898	3.6408e+09
Central Atlantic	ODP1260B	95.1811	9.04423e+08	1.76752	4.31617e+09
North Atlantic	DSDP551	95.1948	9770000000	3.5	92326500000
Germany	Wunstorf	95.195	5920000000	27.5	439560000000
England	Holywell Pinnacle	95.1972	3500000000	17.7778	1.68e+11
Central Atlantic	ODP1258B	95.2393	3.97294e+08	4.87898	5.23365e+09
Germany	Wunstorf	95.24	3180000000	30	2.5758e+11
England	Holywell Pinnacle	95.2506	2610000000	17.7778	1.2528e+11
North Atlantic	DSDP551	95.264	5100000000	3.5	48195000000
Germany	Wunstorf	95.2798	4450000000	30	360450000000
Central Atlantic	ODP1258B	95.284	7.45553e+08	4.87898	9.82135e+09
Central Atlantic	ODP1260B	95.2901	1.46457e+09	1.76752	6.98936e+09
England	Holywell Pinnacle	95.3069	2180000000	17.7778	1.0464e+11
Germany	Wunstorf	95.3109	1540000000	30	1.2474e+11
Central Atlantic	ODP1258B	95.3308	3.23121e+08	4.87898	4.25655e+09
North Atlantic	DSDP551	95.3333	5470000000	3.5	51691500000
Germany	Wunstorf	95.3473	1630000000	37.5	165037500000
Central Atlantic	ODP1258B	95.3669	8.73636e+08	4.87898	1.15086e+10
England	Holywell Pinnacle	95.3688	1360000000	17.7778	6.528e+10
Germany	Wunstorf	95.372	2800000000	37.5	283500000000
Germany	Wunstorf	95.4019	4460000000	37.5	451575000000
North Atlantic	DSDP551	95.4025	6910000000	3.5	6.52995e+10
Central Atlantic	ODP1258B	95.4285	5.91864e+08	4.87898	7.79678e+09
England	Holywell Pinnacle	95.4419	1810000000	17.7778	8.688e+10
Central Atlantic	ODP1258B	95.47	3.01037e+08	4.87898	3.96563e+09
Central Atlantic	ODP1260A	95.47	1.40537e+09	1.76752	6.70684e+09
Germany	Wunstorf	95.47	2130000000	33.5	192658500000
North Atlantic	DSDP551	95.47	5690000000	3.5	53770500000
France	Blieux	95.5184	4.43972e+07	37.5	4.49521e+09
Germany	Wunstorf	95.5255	2080000000	33.5	188136000000
North Atlantic	DSDP549	95.5306	3320000000	3.5	3.1374e+10
Germany	Wunstorf	95.5317	4930000000	31.5	4.19296e+11
Central Atlantic	ODP1260B	95.5354	2.539e+09	8.4	5.75844e+10
Central Atlantic	ODP1258B	95.5433	8.44684e+08	3	6.84194e+09
North Atlantic	DSDP549	95.5669	2880000000	3.5	27216000000
France	Blieux	95.5741	5.68318e+08	37.5	5.75422e+10
Germany	Wunstorf	95.5868	3910000000	31.5	332545500000
North Atlantic	DSDP549	95.5998	3580000000	3.5	3.3831e+10
France	Blieux	95.6066	3.42888e+08	37.5	3.47174e+10
Germany	Wunstorf	95.6488	4750000000	30	384750000000
France	Blieux	95.653	1.90188e+08	37.5	1.92565e+10
Central Atlantic	ODP1258B	95.6603	9.46921e+07	3	7.67006e+08
Germany	Wunstorf	95.6615	1.07e+09	30	8.667e+10
Germany	Wunstorf	95.6667	3900000000	30	315900000000
North Atlantic	DSDP549	95.6725	3130000000	3.5	2.95785e+10
France	Blieux	95.7017	3.27059e+08	37.5	3.31147e+10
North Atlantic	DSDP549	95.7071	2230000000	3.5	21073500000
Germany	Wunstorf	95.7092	2420000000	30	196020000000
North Atlantic	DSDP549	95.7227	3080000000	3.5	2.9106e+10
France	Blieux	95.7481	4.31372e+08	37.5	4.36764e+10
Central Atlantic	ODP1258B	95.7517	1.32169e+08	3	1.07057e+09
North Atlantic	DSDP549	95.792	3750000000	3.5	35437500000
North Atlantic	DSDP549	95.811	2680000000	3.5	25326000000
France	Blieux	95.8293	4.20993e+08	61.25	6.96217e+10
Central Atlantic	ODP1258B	95.8559	1.87827e+08	3	1.5214e+09
North Atlantic	DSDP549	95.8785	1280000000	3.5	12096000000
France	Blieux	95.9036	2.61681e+08	61.25	4.32755e+10
North Atlantic	DSDP549	95.9166	1470000000	3.5	13891500000
Central Atlantic	ODP1258B	95.96	8.03621e+07	3	6.50933e+08
France	Blieux	96.0265	2.56658e+08	61.25	4.24449e+10
Central Atlantic	ODP1258B	96.0727	2.37907e+08	3	1.92705e+09
France	Blieux	96.0729	6.95339e+07	61.25	1.14992e+10
France	Blieux	96.0915	3.20333e+07	61.25	5.29751e+09
France	Blieux	96.1263	1.14507e+08	61.25	1.89366e+10
France	Blieux	96.1588	9.86476e+07	61.25	1.63139e+10
Central Atlantic	ODP1258B	96.1854	8.69633e+07	3	7.04403e+08
France	Blieux	96.1959	3.35221e+07	61.25	5.54372e+09
France	Blieux	96.2052	4.39357e+07	61.25	7.26587e+09
France	Blieux	96.2168	1.6477e+07	61.25	2.72488e+09
France	Blieux	96.2307	1.21582e+08	61.25	2.01066e+10
France	Blieux	96.24	2.95545e+07	61.25	4.88758e+09
France	Blieux	96.2539	8.8181e+07	107.5	2.55945e+10
France	Blieux	96.2702	2.1482e+08	107.5	6.23515e+10
France	Blieux	96.2887	1.89335e+08	107.5	5.49544e+10
France	Blieux	96.3096	5.23505e+08	107.5	1.51947e+11
France	Blieux	96.3514	2.24091e+08	107.5	6.50424e+10
France	Blieux	96.3583	2.76816e+08	107.5	8.03457e+10
France	Blieux	96.3978	4.80519e+08	107.5	1.39471e+11
France	Blieux	96.6484	2.69074e+08	107.5	7.80988e+10
France	Blieux	96.8085	8.77586e+08	107.5	2.54719e+11
France	Blieux	97.001	5.94647e+08	107.5	1.72596e+11
France	Blieux	97.0242	5.07381e+07	107.5	1.47267e+10
France	Blieux	97.0335	5.60614e+07	107.5	1.62718e+10
France	Blieux	97.0637	2.67413e+07	107.5	7.76166e+09
France	Blieux	97.0939	4.46242e+07	107.5	1.29522e+10
France	Blieux	97.1194	2.58208e+08	107.5	7.4945e+10
France	Blieux	97.1797	4.40946e+08	107.5	1.27985e+11
France	Blieux	97.189	3.99614e+07	107.5	1.15988e+10
France	Blieux	97.2168	1.15862e+07	107.5	3.36288e+09
France	Blieux	97.2238	2.68652e+08	107.5	7.79761e+10
France	Blieux	97.2331	1.74955e+07	107.5	5.07807e+09
France	Blieux	97.2632	3.05994e+07	107.5	8.88148e+09
France	Blieux	97.2795	1.89783e+07	107.5	5.50845e+09
France	Col de Palluel	100.981	5.27473e+08	44	6.26637e+10
France	Col de Palluel	100.982	2.27473e+09	44	2.70237e+11
France	Col de Palluel	100.983	2.37363e+09	44	2.81987e+11
France	Col de Palluel	100.984	2.24176e+09	44	2.66321e+11
France	Col de Palluel	100.985	1.45055e+09	44	1.72325e+11
France	Col de Palluel	100.986	1.51648e+09	44	1.80158e+11
France	Col de Palluel	100.987	1.64835e+09	44	1.95824e+11
France	Col de Palluel	100.988	2.63736e+09	44	3.13319e+11
France	Col de Palluel	100.989	2.8022e+09	44	3.32901e+11
France	Col de Palluel	100.99	2.76923e+09	44	3.28985e+11
France	Col de Palluel	100.991	2.14286e+09	44	2.54571e+11
France	Col de Palluel	100.992	1.05495e+09	44	1.25327e+11
France	Col de Palluel	100.993	2.43956e+09	44	2.8982e+11
France	Col de Palluel	100.995	1.15385e+09	44	1.37077e+11
France	Col de Palluel	100.996	2.63736e+08	44	3.13319e+10
France	Col de Palluel	100.997	1.38462e+09	44	1.64492e+11
France	Col de Palluel	100.998	1.74725e+09	44	2.07574e+11
France	Col de Palluel	100.999	1.18681e+09	44	1.40993e+11
France	Col de Palluel	101	2.17582e+09	44	2.58488e+11
France	Col de Palluel	101.001	3.06593e+09	44	3.64233e+11
France	Col de Palluel	101.002	1.61538e+09	44	1.91908e+11
France	Col de Palluel	101.003	1.91209e+09	44	2.27156e+11
France	Col de Palluel	101.004	1.87912e+09	44	2.2324e+11
France	Col de Palluel	101.005	8.24176e+08	44	9.79121e+10
France	Col de Palluel	101.006	1.31868e+09	44	1.56659e+11
France	Col de Palluel	101.007	1.71429e+09	44	2.03657e+11
France	Col de Palluel	101.008	2.04396e+09	44	2.42822e+11
France	Col de Palluel	101.009	1.38462e+09	44	1.64492e+11
France	Col de Palluel	101.01	1.35165e+09	44	1.60576e+11
France	Col de Palluel	101.011	3.23077e+09	44	3.83815e+11
France	Col de Palluel	101.012	1.64835e+09	44	1.95824e+11
France	Col de Palluel	101.013	1.31868e+09	44	1.56659e+11
France	Col de Palluel	101.014	2.17582e+09	44	2.58488e+11
France	Col de Palluel	101.015	2.96703e+08	44	3.52484e+10
France	Col de Palluel	101.016	1.21978e+09	44	1.4491e+11
France	Col de Palluel	101.017	1.94505e+09	44	2.31073e+11
France	Col de Palluel	101.018	1.08791e+09	44	1.29244e+11
France	Col de Palluel	101.02	2.93407e+09	44	3.48567e+11
France	Col de Palluel	101.021	1.91209e+09	44	2.27156e+11
France	Col de Palluel	101.022	1.51648e+09	44	1.80158e+11
France	Col de Palluel	101.023	1.64835e+09	44	1.95824e+11
France	Col de Palluel	101.024	6.92308e+08	44	8.22462e+10
France	Col de Palluel	101.025	6.98901e+08	44	8.30295e+10
France	Col de Palluel	101.026	1.31868e+09	44	1.56659e+11
France	Col de Palluel	101.027	1.25275e+09	44	1.48826e+11
France	Col de Palluel	101.028	1.45055e+09	44	1.72325e+11
France	Col de Palluel	101.029	8.9011e+08	44	1.05745e+11
France	Col de Palluel	101.03	1.18681e+09	44	1.40993e+11
France	Col de Palluel	101.031	9.56044e+08	44	1.13578e+11
France	Col de Palluel	101.032	1.84615e+09	44	2.19323e+11
Morocco	Addar	110.444	9.14983e+07	38.1818	9.43264e+09
Morocco	Addar	110.486	3.81243e+07	38.1818	3.93027e+09
Morocco	Addar	110.512	1.07998e+08	38.1818	1.11336e+10
Morocco	Addar	110.565	4.65616e+08	38.1818	4.80008e+10
Morocco	Addar	110.596	3.21329e+08	38.1818	3.31261e+10
Morocco	Addar	110.628	1.396e+08	38.1818	1.43915e+10
Morocco	Addar	110.654	2.58557e+08	38.1818	2.66549e+10
Morocco	Addar	110.702	4.9845e+08	38.1818	5.13857e+10
Morocco	Addar	110.802	3.38607e+08	38.1818	3.49074e+10
France	L'Arboudeysse	110.849	2730000000	37	2.72727e+11
France	L'Arboudeysse	110.857	2390000000	37	2.38761e+11
France	L'Arboudeysse	110.865	2570000000	37	2.56743e+11
Morocco	Addar	110.87	1.38747e+08	38.1818	1.43036e+10
France	L'Arboudeysse	110.873	2950000000	37	294705000000
France	L'Arboudeysse	110.88	2840000000	37	283716000000
France	L'Arboudeysse	110.888	3080000000	37	307692000000
France	L'Arboudeysse	110.896	2310000000	37	230769000000
France	L'Arboudeysse	110.904	2230000000	37	222777000000
France	L'Arboudeysse	110.912	2720000000	37	2.71728e+11
France	L'Arboudeysse	110.919	2920000000	37	291708000000
France	L'Arboudeysse	110.927	2360000000	37	2.35764e+11
France	L'Arboudeysse	110.935	3130000000	37	312687000000
France	L'Arboudeysse	110.943	2340000000	37	2.33766e+11
France	L'Arboudeysse	110.951	3110000000	37	310689000000
Morocco	Addar	110.954	4.44185e+08	23.6364	2.83471e+10
France	L'Arboudeysse	110.958	2910000000	37	290709000000
France	L'Arboudeysse	110.966	3160000000	37	315684000000
France	L'Arboudeysse	110.974	2940000000	37	293706000000
France	L'Arboudeysse	110.982	2140000000	37	213786000000
France	L'Arboudeysse	110.99	1850000000	37	184815000000
Morocco	Tamzergout	110.997	4.57491e+07	98.75	1.21979e+10
France	L'Arboudeysse	110.997	2030000000	37	202797000000
France	L'Arboudeysse	111.005	1520000000	37	151848000000
France	L'Arboudeysse	111.013	2240000000	37	223776000000
France	L'Arboudeysse	111.021	1880000000	37	187812000000
France	L'Arboudeysse	111.029	2090000000	37	208791000000
France	L'Arboudeysse	111.036	2450000000	37	2.44755e+11
France	L'Arboudeysse	111.044	2270000000	37	226773000000
France	L'Arboudeysse	111.052	1700000000	37	169830000000
France	L'Arboudeysse	111.06	2030000000	37	202797000000
Morocco	Tamzergout	111.062	1.06248e+08	98.75	2.83284e+10
France	L'Arboudeysse	111.068	2360000000	37	2.35764e+11
France	L'Arboudeysse	111.075	1850000000	37	184815000000
Morocco	Addar	111.081	1.09998e+08	23.6364	7.01987e+09
France	L'Arboudeysse	111.083	1820000000	37	181818000000
France	L'Arboudeysse	111.091	2270000000	37	226773000000
North Atlantic	DSDP545	111.091	1840000000	13	6.4584e+10
France	L'Arboudeysse	111.099	2420000000	37	2.41758e+11
North Atlantic	DSDP545	111.102	1710000000	13	6.0021e+10
Morocco	Tamzergout	111.103	1.42214e+08	98.75	3.79179e+10
North Atlantic	DSDP545	111.112	2520000000	13	88452000000
Morocco	Tamzergout	111.113	1.72497e+08	98.75	4.59919e+10
France	L'Arboudeysse	111.118	2360000000	37	2.35764e+11
North Atlantic	DSDP545	111.122	1410000000	13	49491000000
France	L'Arboudeysse	111.122	2560000000	37	2.55744e+11
Morocco	Tamzergout	111.123	4.80876e+07	98.75	1.28214e+10
France	L'Arboudeysse	111.126	2470000000	37	2.46753e+11
France	L'Arboudeysse	111.13	2330000000	37	2.32767e+11
North Atlantic	DSDP545	111.132	1960000000	13	68796000000
France	L'Arboudeysse	111.134	1510000000	37	150849000000
France	L'Arboudeysse	111.138	2530000000	37	2.52747e+11
France	L'Arboudeysse	111.14	2540000000	37	2.53746e+11
France	L'Arboudeysse	111.141	1620000000	37	161838000000
France	L'Arboudeysse	111.142	1550000000	37	154845000000
North Atlantic	DSDP545	111.142	1180000000	13	41418000000
France	L'Arboudeysse	111.143	1210000000	37	1.20879e+11
France	L'Arboudeysse	111.143	1530000000	37	152847000000
Morocco	Tamzergout	111.143	3.09318e+08	98.75	8.24719e+10
France	L'Arboudeysse	111.146	1420000000	37	141858000000
France	L'Arboudeysse	111.148	1360000000	37	1.35864e+11
France	L'Arboudeysse	111.15	1420000000	37	141858000000
France	L'Arboudeysse	111.15	1120000000	37	111888000000
North Atlantic	DSDP545	111.152	1210000000	13	42471000000
France	L'Arboudeysse	111.152	1450000000	37	144855000000
Morocco	Tamzergout	111.154	2.28746e+08	98.75	6.09893e+10
France	L'Arboudeysse	111.156	999000000	37	99800100000
France	L'Arboudeysse	111.157	1380000000	37	137862000000
France	L'Arboudeysse	111.159	1320000000	37	1.31868e+11
France	L'Arboudeysse	111.161	1060000000	37	105894000000
North Atlantic	DSDP545	111.162	1300000000	13	45630000000
Morocco	Tamzergout	111.164	2.81803e+08	98.75	7.51356e+10
France	L'Arboudeysse	111.164	1430000000	37	142857000000
Morocco	Addar	111.165	9.93731e+07	23.6364	6.34181e+09
North Atlantic	DSDP545	111.166	983000000	13	34503300000
France	L'Arboudeysse	111.168	1370000000	37	1.36863e+11
France	L'Arboudeysse	111.17	1170000000	37	1.16883e+11
North Atlantic	DSDP545	111.17	1110000000	13	38961000000
France	L'Arboudeysse	111.172	1050000000	37	104895000000
Morocco	Tamzergout	111.174	2.39732e+08	98.75	6.39185e+10
North Atlantic	DSDP545	111.176	604000000	13	21200400000
France	L'Arboudeysse	111.179	959000000	37	95804100000
Morocco	Tamzergout	111.179	2.57765e+08	98.75	6.87266e+10
France	L'Arboudeysse	111.179	1460000000	37	145854000000
North Atlantic	DSDP545	111.182	398000000	13	13969800000
France	L'Arboudeysse	111.182	1040000000	37	103896000000
France	L'Arboudeysse	111.186	702000000	37	70129800000
France	L'Arboudeysse	111.187	766000000	37	76523400000
France	L'Arboudeysse	111.189	959000000	37	95804100000
Morocco	Tamzergout	111.189	1.41997e+08	98.75	3.786e+10
France	L'Arboudeysse	111.192	605000000	37	6.04395e+10
North Atlantic	DSDP545	111.192	901000000	13	3.16251e+10
France	L'Arboudeysse	111.193	933000000	37	93206700000
France	L'Arboudeysse	111.195	714000000	37	71328600000
France	L'Arboudeysse	111.196	801000000	37	80019900000
France	L'Arboudeysse	111.198	830000000	37	82917000000
Morocco	Tamzergout	111.199	1.01972e+08	98.75	2.71882e+10
France	L'Arboudeysse	111.2	782000000	37	78121800000
France	L'Arboudeysse	111.201	932000000	37	93106800000
France	L'Arboudeysse	111.203	901000000	37	90009900000
France	L'Arboudeysse	111.204	923000000	37	92207700000
France	L'Arboudeysse	111.206	870000000	37	86913000000
France	L'Arboudeysse	111.207	704000000	37	70329600000
France	L'Arboudeysse	111.211	1160000000	37	115884000000
France	L'Arboudeysse	111.212	780000000	37	77922000000
France	L'Arboudeysse	111.213	1460000000	37	145854000000
France	L'Arboudeysse	111.214	1520000000	37	151848000000
France	L'Arboudeysse	111.217	1100000000	37	109890000000
Morocco	Tamzergout	111.219	1.52489e+08	98.75	4.06573e+10
France	L'Arboudeysse	111.22	1190000000	37	1.18881e+11
North Atlantic	DSDP545	111.223	1060000000	13	37206000000
France	L'Arboudeysse	111.223	859000000	37	85814100000
North Atlantic	DSDP545	111.227	661000000	13	23201100000
France	L'Arboudeysse	111.228	1210000000	37	1.20879e+11
France	L'Arboudeysse	111.229	1470000000	37	146853000000
France	L'Arboudeysse	111.23	781000000	37	78021900000
North Atlantic	DSDP545	111.231	754000000	13	26465400000
France	L'Arboudeysse	111.231	1110000000	37	110889000000
France	L'Arboudeysse	111.234	1100000000	37	109890000000
France	L'Arboudeysse	111.236	1120000000	37	111888000000
North Atlantic	DSDP545	111.237	735000000	13	25798500000
France	L'Arboudeysse	111.239	910000000	37	90909000000
North Atlantic	DSDP545	111.241	876000000	13	3.07476e+10
France	L'Arboudeysse	111.245	1010000000	37	100899000000
North Atlantic	DSDP545	111.247	755000000	13	26500500000
France	L'Arboudeysse	111.248	924000000	37	92307600000
France	L'Arboudeysse	111.25	896000000	37	89510400000
North Atlantic	DSDP545	111.251	1100000000	13	38610000000
France	L'Arboudeysse	111.251	1370000000	37	1.36863e+11
France	L'Arboudeysse	111.253	1200000000	37	1.1988e+11
France	L'Arboudeysse	111.254	991000000	37	99000900000
France	L'Arboudeysse	111.257	982000000	37	98101800000
North Atlantic	DSDP545	111.261	1260000000	13	44226000000
France	L'Arboudeysse	111.261	1070000000	37	106893000000
France	L'Arboudeysse	111.264	1140000000	37	113886000000
France	L'Arboudeysse	111.264	1160000000	37	115884000000
North Atlantic	DSDP545	111.265	1300000000	13	45630000000
France	L'Arboudeysse	111.265	1050000000	37	104895000000
France	L'Arboudeysse	111.266	1010000000	37	100899000000
France	L'Arboudeysse	111.267	1390000000	37	138861000000
France	L'Arboudeysse	111.268	1450000000	37	144855000000
France	L'Arboudeysse	111.268	1650000000	37	164835000000
France	L'Arboudeysse	111.27	1520000000	37	151848000000
Morocco	Addar	111.27	3.31457e+08	23.6364	2.1153e+10
Morocco	Tamzergout	111.27	1.5781e+09	98.75	4.2076e+11
North Atlantic	DSDP545	111.273	1800000000	13	6.318e+10
France	L'Arboudeysse	111.273	2330000000	37	2.32767e+11
France	L'Arboudeysse	111.277	2640000000	37	2.63736e+11
France	L'Arboudeysse	111.278	3770000000	37	376623000000
France	L'Arboudeysse	111.282	3400000000	37	339660000000
North Atlantic	DSDP545	111.283	1910000000	13	6.7041e+10
France	L'Arboudeysse	111.286	2070000000	37	206793000000
France	L'Arboudeysse	111.29	2360000000	37	2.35764e+11
North Atlantic	DSDP545	111.293	1660000000	13	5.8266e+10
France	L'Arboudeysse	111.294	1800000000	37	179820000000
France	L'Arboudeysse	111.298	1770000000	37	176823000000
France	L'Arboudeysse	111.302	2050000000	37	204795000000
North Atlantic	DSDP545	111.303	1910000000	13	6.7041e+10
France	L'Arboudeysse	111.308	888000000	37	88711200000
France	L'Arboudeysse	111.31	1180000000	37	1.17882e+11
North Atlantic	DSDP545	111.313	2360000000	13	82836000000
France	L'Arboudeysse	111.314	1380000000	37	137862000000
France	L'Arboudeysse	111.317	2800000000	37	279720000000
France	L'Arboudeysse	111.321	2660000000	37	2.65734e+11
North Atlantic	DSDP545	111.323	1910000000	13	6.7041e+10
France	L'Arboudeysse	111.325	2300000000	37	229770000000
France	L'Arboudeysse	111.332	2090000000	37	208791000000
North Atlantic	DSDP545	111.334	1850000000	13	6.4935e+10
France	L'Arboudeysse	111.339	2750000000	37	2.74725e+11
North Atlantic	DSDP545	111.344	1930000000	13	6.7743e+10
France	L'Arboudeysse	111.349	2390000000	37	2.38761e+11
North Atlantic	DSDP545	111.354	1770000000	13	6.2127e+10
France	L'Arboudeysse	111.357	3220000000	37	321678000000
North Atlantic	DSDP545	111.364	1760000000	13	6.1776e+10
France	L'Arboudeysse	111.364	3000000000	37	299700000000
France	L'Arboudeysse	111.372	2640000000	37	2.63736e+11
North Atlantic	DSDP545	111.374	1520000000	13	53352000000
France	L'Arboudeysse	111.38	3610000000	37	360639000000
North Atlantic	DSDP545	111.384	1380000000	13	48438000000
France	L'Arboudeysse	111.388	3020000000	37	301698000000
North Atlantic	DSDP545	111.394	1660000000	13	5.8266e+10
France	L'Arboudeysse	111.396	3130000000	37	312687000000
France	L'Arboudeysse	111.403	2730000000	37	2.72727e+11
North Atlantic	DSDP545	111.404	530000000	13	18603000000
France	L'Arboudeysse	111.411	2990000000	37	298701000000
North Atlantic	DSDP545	111.414	1370000000	13	48087000000
France	L'Arboudeysse	111.419	3010000000	37	300699000000
North Atlantic	DSDP545	111.424	1250000000	13	43875000000
France	L'Arboudeysse	111.427	2270000000	37	226773000000
North Atlantic	DSDP545	111.434	1280000000	13	44928000000
France	L'Arboudeysse	111.435	2580000000	37	2.57742e+11
France	L'Arboudeysse	111.442	2860000000	37	285714000000
North Atlantic	DSDP545	111.444	1170000000	13	41067000000
France	L'Arboudeysse	111.45	3460000000	37	345654000000
North Atlantic	DSDP545	111.455	1110000000	13	38961000000
France	L'Arboudeysse	111.458	3350000000	37	334665000000
North Atlantic	DSDP545	111.465	935000000	13	3.28185e+10
France	L'Arboudeysse	111.466	2750000000	37	2.74725e+11
France	L'Arboudeysse	111.474	2320000000	37	231768000000
France	L'Arboudeysse	111.481	2040000000	37	203796000000
North Atlantic	DSDP545	111.485	843000000	13	2.95893e+10
France	L'Arboudeysse	111.489	2390000000	37	2.38761e+11
North Atlantic	DSDP545	111.495	1190000000	13	41769000000
France	L'Arboudeysse	111.497	2650000000	37	2.64735e+11
France	L'Arboudeysse	111.505	2640000000	37	2.63736e+11
France	L'Arboudeysse	111.513	2710000000	37	2.70729e+11
North Atlantic	DSDP545	111.515	1120000000	13	39312000000
France	L'Arboudeysse	111.52	2620000000	37	2.61738e+11
France	L'Arboudeysse	111.528	1870000000	37	186813000000
France	L'Arboudeysse	111.535	1410000000	37	140859000000
North Atlantic	DSDP545	111.535	1600000000	13	56160000000
France	L'Arboudeysse	111.54	1170000000	37	1.16883e+11
France	L'Arboudeysse	111.546	2020000000	37	201798000000
France	L'Arboudeysse	111.552	1880000000	37	187812000000
North Atlantic	DSDP545	111.555	1900000000	13	6.669e+10
France	L'Arboudeysse	111.559	1970000000	37	196803000000
France	L'Arboudeysse	111.567	2100000000	37	209790000000
France	L'Arboudeysse	111.575	1990000000	37	198801000000
North Atlantic	DSDP545	111.576	2100000000	13	73710000000
France	L'Arboudeysse	111.583	2610000000	37	2.60739e+11
France	L'Arboudeysse	111.591	2330000000	37	2.32767e+11
North Atlantic	DSDP545	111.596	2020000000	13	70902000000
France	L'Arboudeysse	111.599	1510000000	37	150849000000
France	L'Arboudeysse	111.606	1550000000	37	154845000000
France	L'Arboudeysse	111.614	2290000000	37	228771000000
North Atlantic	DSDP545	111.616	1870000000	13	6.5637e+10
France	L'Arboudeysse	111.624	1650000000	37	164835000000
North Atlantic	DSDP545	111.636	1350000000	13	47385000000
France	L'Arboudeysse	111.636	2480000000	37	2.47752e+11
France	L'Arboudeysse	111.645	2280000000	37	227772000000
France	L'Arboudeysse	111.656	2540000000	37	2.53746e+11
North Atlantic	DSDP545	111.656	1060000000	13	37206000000
France	L'Arboudeysse	111.665	2100000000	37	209790000000
France	L'Arboudeysse	111.673	1960000000	37	195804000000
North Atlantic	DSDP545	111.676	884000000	13	3.10284e+10
France	L'Arboudeysse	111.683	1880000000	37	187812000000
France	L'Arboudeysse	111.692	2210000000	37	220779000000
North Atlantic	DSDP545	111.697	1320000000	13	46332000000
France	L'Arboudeysse	111.702	2210000000	37	220779000000
France	L'Arboudeysse	111.712	2820000000	37	281718000000
North Atlantic	DSDP545	111.717	1500000000	13	52650000000
France	L'Arboudeysse	111.722	1900000000	37	189810000000
France	L'Arboudeysse	111.731	2040000000	37	203796000000
North Atlantic	DSDP545	111.737	1290000000	13	45279000000
France	L'Arboudeysse	111.741	2630000000	37	2.62737e+11
France	L'Arboudeysse	111.749	2440000000	37	2.43756e+11
North Atlantic	DSDP545	111.757	1570000000	13	55107000000
France	L'Arboudeysse	111.757	2190000000	37	218781000000
France	L'Arboudeysse	111.765	1960000000	37	195804000000
France	L'Arboudeysse	111.773	1810000000	37	180819000000
North Atlantic	DSDP545	111.773	1230000000	13	43173000000
France	L'Arboudeysse	111.78	1610000000	37	160839000000
France	L'Arboudeysse	111.788	2170000000	37	216783000000
North Atlantic	DSDP545	111.797	1000000000	13	35100000000
France	L'Arboudeysse	111.798	1900000000	37	189810000000
France	L'Arboudeysse	111.808	1910000000	37	190809000000
France	L'Arboudeysse	111.817	1800000000	37	179820000000
North Atlantic	DSDP545	111.817	1040000000	13	36504000000
France	L'Arboudeysse	111.825	1920000000	37	191808000000
France	L'Arboudeysse	111.833	1960000000	37	195804000000
North Atlantic	DSDP545	111.838	1250000000	13	43875000000
France	L'Arboudeysse	111.841	2490000000	37	2.48751e+11
France	L'Arboudeysse	111.848	1250000000	37	1.24875e+11
France	L'Arboudeysse	111.856	1860000000	37	185814000000
North Atlantic	DSDP545	111.858	1020000000	13	35802000000
France	L'Arboudeysse	111.864	1910000000	37	190809000000
France	L'Arboudeysse	111.872	1840000000	37	183816000000
North Atlantic	DSDP545	111.878	1000000000	13	35100000000
Morocco	Addar	111.88	6.95237e+08	4.4186	8.29434e+09
France	L'Arboudeysse	111.882	1840000000	37	183816000000
France	L'Arboudeysse	111.887	2320000000	37	231768000000
France	L'Arboudeysse	111.895	1900000000	37	189810000000
North Atlantic	DSDP545	111.898	733000000	13	25728300000
France	L'Arboudeysse	111.903	2240000000	37	223776000000
France	L'Arboudeysse	111.909	1670000000	37	166833000000
France	L'Arboudeysse	111.915	2060000000	37	205794000000
France	L'Arboudeysse	111.921	1930000000	37	192807000000
France	L'Arboudeysse	111.926	2100000000	37	209790000000
France	Hyèges	112.047	1.26807e+09	24	8.21708e+10
France	Hyèges	112.159	1.33174e+09	24	8.6297e+10
France	Hyèges	112.196	1.25096e+09	24	8.10625e+10
France	Hyèges	112.283	1.15807e+09	24	7.50427e+10
Morocco	Addar	112.388	5.31808e+08	4.4186	6.34459e+09
Morocco	Tamzergout	112.519	5.32875e+08	4.00458	5.76164e+09
France	Hyèges	112.519	1.55203e+09	24	1.00572e+11
France	Hyèges	112.618	1.00675e+09	24	6.52375e+10
France	Pré-Guittard	112.721	2070000000	37	206793000000
France	Hyèges	112.73	1.46455e+09	24	9.49029e+10
France	Pré-Guittard	112.744	2540000000	37	2.53746e+11
France	Pré-Guittard	112.764	2330000000	37	2.32767e+11
France	Hyèges	112.779	8.94315e+08	24	5.79516e+10
France	Pré-Guittard	112.782	1530000000	37	152847000000
France	Pré-Guittard	112.795	2250000000	37	224775000000
France	Pré-Guittard	112.808	1970000000	37	196803000000
France	Pré-Guittard	112.816	1790000000	37	178821000000
France	Pré-Guittard	112.823	1980000000	37	197802000000
France	Pré-Guittard	112.828	1560000000	37	155844000000
France	Pré-Guittard	112.842	1590000000	37	158841000000
France	Pré-Guittard	112.851	1820000000	37	181818000000
France	Pré-Guittard	112.859	1610000000	37	160839000000
France	Pré-Guittard	112.877	1820000000	37	181818000000
France	Pré-Guittard	112.894	1990000000	37	198801000000
Morocco	Addar	112.896	7.11671e+08	4.4186	8.4904e+09
France	Pré-Guittard	112.911	2280000000	37	227772000000
France	Pré-Guittard	112.929	1840000000	37	183816000000
France	Pré-Guittard	112.942	2000000000	37	199800000000
France	Pré-Guittard	112.954	2020000000	37	201798000000
France	Pré-Guittard	112.967	1980000000	37	197802000000
France	Pré-Guittard	112.984	2160000000	37	215784000000
France	Pré-Guittard	113.001	2120000000	37	211788000000
France	Hyèges	113.003	9.86824e+08	24	6.39462e+10
France	Hyèges	113.006	1.18255e+09	24	7.66295e+10
France	Hyèges	113.009	9.59796e+08	24	6.21948e+10
France	Hyèges	113.012	1.23456e+09	24	7.99996e+10
France	Pré-Guittard	113.015	1760000000	37	175824000000
France	Hyèges	113.015	1.03566e+09	24	6.7111e+10
France	Hyèges	113.018	7.00216e+08	24	4.5374e+10
France	Hyèges	113.021	7.79472e+08	24	5.05098e+10
France	Pré-Guittard	113.024	1980000000	37	197802000000
France	Hyèges	113.024	7.10434e+08	24	4.60361e+10
France	Hyèges	113.027	8.72193e+08	24	5.65181e+10
France	Hyèges	113.031	8.5953e+08	24	5.56976e+10
France	Pré-Guittard	113.032	1900000000	37	189810000000
France	Hyèges	113.034	1.03276e+09	24	6.69226e+10
France	Hyèges	113.037	7.23968e+08	24	4.69131e+10
France	Hyèges	113.04	1.16861e+09	24	7.57257e+10
France	Pré-Guittard	113.041	1470000000	37	146853000000
France	Hyèges	113.043	9.26013e+08	24	6.00056e+10
France	Hyèges	113.046	1.75145e+09	24	1.13494e+11
France	Hyèges	113.049	9.30434e+08	24	6.02921e+10
France	Pré-Guittard	113.05	1530000000	37	152847000000
France	Hyèges	113.052	5.06231e+08	24	3.28037e+10
France	Hyèges	113.055	1.56787e+09	24	1.01598e+11
France	Pré-Guittard	113.058	1480000000	37	147852000000
France	Hyèges	113.058	5.69321e+08	24	3.6892e+10
France	Hyèges	113.062	4.89735e+08	24	3.17348e+10
France	Hyèges	113.065	6.51117e+08	24	4.21924e+10
France	Pré-Guittard	113.067	1900000000	37	189810000000
France	Hyèges	113.068	1.67605e+09	24	1.08608e+11
France	Hyèges	113.071	4.95132e+08	24	3.20846e+10
France	Hyèges	113.074	8.27528e+08	24	5.36238e+10
France	Pré-Guittard	113.075	1870000000	37	186813000000
France	Hyèges	113.077	5.76432e+08	24	3.73528e+10
France	Hyèges	113.08	1.1606e+09	24	7.52067e+10
France	Hyèges	113.083	1.08422e+09	24	7.02575e+10
France	Pré-Guittard	113.084	1360000000	37	1.35864e+11
France	Hyèges	113.086	6.49342e+08	24	4.20773e+10
France	Hyèges	113.089	1.09363e+09	24	7.08671e+10
France	Hyèges	113.093	9.62199e+08	24	6.23505e+10
France	Pré-Guittard	113.093	2120000000	37	211788000000
France	Hyèges	113.096	1.13036e+09	24	7.32474e+10
France	Hyèges	113.099	8.48595e+08	24	5.4989e+10
France	Pré-Guittard	113.101	2050000000	37	204795000000
France	Hyèges	113.102	1.2288e+09	24	7.96261e+10
France	Hyèges	113.105	1.29364e+09	24	8.38276e+10
France	Hyèges	113.108	4.74804e+09	24	3.07673e+11
France	Hyèges	113.111	5.01403e+08	24	3.24909e+10
France	Hyèges	113.114	4.54548e+08	24	2.94547e+10
France	Hyèges	113.117	6.58719e+08	24	4.2685e+10
France	Hyèges	113.12	3.82245e+08	24	2.47695e+10
France	Hyèges	113.124	6.28384e+08	24	4.07193e+10
France	Hyèges	113.127	4.15743e+08	24	2.69402e+10
France	Pré-Guittard	113.127	1350000000	37	1.34865e+11
France	Hyèges	113.13	8.7936e+08	24	5.69825e+10
France	Hyèges	113.133	4.59295e+08	24	2.97623e+10
France	Hyèges	113.136	5.92262e+08	24	3.83786e+10
France	Pré-Guittard	113.136	1590000000	37	158841000000
France	Hyèges	113.139	3.52532e+08	24	2.2844e+10
France	Hyèges	113.142	7.71585e+08	24	4.99987e+10
France	Pré-Guittard	113.145	1790000000	37	178821000000
France	Hyèges	113.145	6.44436e+08	24	4.17595e+10
France	Hyèges	113.148	6.28995e+08	24	4.07589e+10
France	Hyèges	113.152	5.96557e+08	24	3.86569e+10
France	Hyèges	113.155	6.22261e+08	24	4.03225e+10
France	Hyèges	113.158	6.97103e+08	24	4.51723e+10
France	Hyèges	113.161	1.26695e+09	24	8.20985e+10
France	Pré-Guittard	113.164	1670000000	37	166833000000
France	Hyèges	113.164	4.64328e+08	24	3.00885e+10
France	Hyèges	113.167	4.90186e+08	24	3.1764e+10
France	Hyèges	113.17	9.83609e+08	24	6.37379e+10
France	Hyèges	113.173	4.86467e+08	24	3.15231e+10
France	Hyèges	113.176	4.40626e+08	24	2.85526e+10
France	Hyèges	113.179	7.05122e+08	24	4.56919e+10
France	Hyèges	113.183	5.15798e+08	24	3.34237e+10
France	Pré-Guittard	113.183	1850000000	37	184815000000
France	Hyèges	113.186	1.43251e+09	24	9.28268e+10
France	Hyèges	113.189	1.04437e+09	24	6.76753e+10
Morocco	Addar	113.201	1.33634e+08	4.4186	1.59428e+09
France	Pré-Guittard	113.202	1710000000	37	170829000000
France	Pré-Guittard	113.221	2010000000	37	200799000000
France	Pré-Guittard	113.24	1990000000	37	198801000000
France	Pré-Guittard	113.257	1810000000	37	180819000000
France	Pré-Guittard	113.285	1690000000	37	168831000000
France	Pré-Guittard	113.312	2110000000	37	210789000000
France	Pré-Guittard	113.33	1880000000	37	187812000000
France	Pré-Guittard	113.342	1720000000	37	171828000000
France	Pré-Guittard	113.352	1940000000	37	193806000000
France	Pré-Guittard	113.361	1860000000	37	185814000000
France	Pré-Guittard	113.371	1830000000	37	182817000000
France	Pré-Guittard	113.38	1830000000	37	182817000000
France	Pré-Guittard	113.387	1860000000	37	185814000000
Morocco	Tamzergout	113.393	3.89217e+08	4.00458	4.20835e+09
France	Pré-Guittard	113.4	1350000000	37	1.34865e+11
France	Pré-Guittard	113.414	1720000000	37	171828000000
France	Pré-Guittard	113.43	1830000000	37	182817000000
France	Pré-Guittard	113.44	1630000000	37	162837000000
France	Pré-Guittard	113.451	1510000000	37	150849000000
France	Pré-Guittard	113.464	1300000000	37	1.2987e+11
France	Pré-Guittard	113.475	1610000000	37	160839000000
France	Pré-Guittard	113.485	1780000000	37	177822000000
France	Pré-Guittard	113.492	1760000000	37	175824000000
France	Pré-Guittard	113.502	1710000000	37	170829000000
Morocco	Addar	113.506	4.00656e+08	4.4186	4.77992e+09
France	Pré-Guittard	113.513	1510000000	37	150849000000
France	Pré-Guittard	113.52	1750000000	37	174825000000
France	Pré-Guittard	113.534	1460000000	37	145854000000
France	Pré-Guittard	113.547	1180000000	37	1.17882e+11
France	Pré-Guittard	113.554	1540000000	37	153846000000
France	Pré-Guittard	113.563	1820000000	37	181818000000
France	Pré-Guittard	113.572	1560000000	37	155844000000
France	Pré-Guittard	113.58	2240000000	37	223776000000
France	Pré-Guittard	113.589	1750000000	37	174825000000
France	Pré-Guittard	113.598	1710000000	37	170829000000
France	Pré-Guittard	113.61	1950000000	37	194805000000
France	Pré-Guittard	113.62	1180000000	37	1.17882e+11
France	Pré-Guittard	113.629	2240000000	37	223776000000
France	Pré-Guittard	113.639	1740000000	37	173826000000
France	Pré-Guittard	113.651	2250000000	37	224775000000
France	Pré-Guittard	113.663	1850000000	37	184815000000
France	Pré-Guittard	113.672	2020000000	37	201798000000
France	Pré-Guittard	113.681	1970000000	37	196803000000
France	Pré-Guittard	113.689	2140000000	37	213786000000
France	Pré-Guittard	113.703	1980000000	37	197802000000
France	Pré-Guittard	113.715	1320000000	37	1.31868e+11
France	Pré-Guittard	113.725	1850000000	37	184815000000
France	Pré-Guittard	113.741	1820000000	37	181818000000
France	Pré-Guittard	113.748	1870000000	37	186813000000
France	Pré-Guittard	113.755	2010000000	37	200799000000
Morocco	Addar	113.811	6.07818e+08	4.4186	7.25141e+09
Morocco	Tamzergout	113.892	5.109e+08	4.00458	5.52403e+09
Morocco	Tamzergout	114.142	4.71866e+08	4.00458	5.10198e+09
Morocco	Addar	114.217	7.79206e+08	4.4186	9.29611e+09
Morocco	Addar	114.725	1.38147e+09	4.4186	1.64813e+10
Morocco	Tamzergout	114.891	7.65137e+08	4.00458	8.27294e+09
Morocco	Addar	114.979	1.31536e+09	4.4186	1.56925e+10
Morocco	Addar	115.64	1.63879e+09	4.4186	1.95512e+10
Morocco	Addar	115.945	2.44392e+09	4.30833	2.84289e+10
Morocco	Addar	116.097	8.71859e+08	4.30833	1.01419e+10
Morocco	Addar	116.351	6.27943e+08	4.30833	7.30454e+09
Morocco	Alma	116.618	4.65614e+08	5.88235	7.39505e+09
Morocco	Alma	116.745	2.32623e+08	5.88235	3.6946e+09
Morocco	Alma	117.383	2.65729e+08	5.88235	4.22041e+09
Morocco	Alma	117.468	2.74995e+07	5.88235	4.36756e+08
Morocco	Alma	117.595	7.18736e+07	5.88235	1.14152e+09
Morocco	Alma	118.02	2.4784e+08	5.88235	3.93628e+09
Morocco	Alma	118.64	4.62031e+08	1.6129	2.01207e+09
Morocco	Alma	119.57	7.01987e+08	1.6129	3.05704e+09
Morocco	Alma	120.035	7.76109e+08	1.6129	3.37983e+09
Morocco	Alma	120.81	2.6823e+08	1.6129	1.1681e+09
Morocco	Alma	121.585	3.06244e+08	1.6129	1.33364e+09
Iran	Takal Kuh	123.652	311000000	256.011	2.14972e+11
Iran	Takal Kuh	123.659	590600000	256.011	4.0824e+11
Iran	Takal Kuh	123.708	164100000	256.011	1.13431e+11
Iran	Takal Kuh	123.726	638100000	256.011	4.41074e+11
France	Rosans	123.762	3.42342e+09	38	3.51242e+11
Iran	Takal Kuh	123.773	843600000	256.011	5.83121e+11
Iran	Takal Kuh	123.788	1.0611e+09	256.011	7.33464e+11
Iran	Takal Kuh	123.799	1463300000	256.011	1.01148e+12
Iran	Takal Kuh	123.814	805700000	256.011	5.56924e+11
France	Rosans	123.821	1056725595	38	1.0842e+11
Iran	Takal Kuh	123.826	1.0289e+09	256.011	7.11206e+11
Iran	Takal Kuh	123.84	438300000	256.011	3.02966e+11
France	Rosans	123.85	1.15071e+09	38	1.18063e+11
Iran	Takal Kuh	123.853	882800000	256.011	6.10217e+11
Iran	Takal Kuh	123.868	443900000	256.011	3.06837e+11
France	Rosans	123.88	6.86388e+08	38	7.04234e+10
Iran	Takal Kuh	123.881	395200000	256.011	2.73174e+11
Iran	Takal Kuh	123.894	1195200000	256.011	8.26158e+11
France	Rosans	123.91	2.38054e+09	38	2.44243e+11
Iran	Takal Kuh	123.921	873700000	256.011	6.03927e+11
Iran	Takal Kuh	123.934	1308100000	256.011	9.04197e+11
France	Rosans	123.939	1.61639e+09	38	1.65842e+11
Iran	Takal Kuh	123.947	1318500000	256.011	9.11386e+11
Iran	Takal Kuh	123.96	843700000	256.011	5.8319e+11
France	Rosans	123.969	2.3259e+09	45	2.82596e+11
Iran	Takal Kuh	123.973	1234300000	256.011	8.53185e+11
Iran	Takal Kuh	123.994	821400000	256.011	5.67776e+11
France	Rosans	123.998	2.08658e+09	45	2.53519e+11
Iran	Takal Kuh	124.016	812800000	256.011	5.61831e+11
France	Rosans	124.028	2091524468	45	2.5412e+11
Iran	Takal Kuh	124.032	921200000	256.011	6.36761e+11
Iran	Takal Kuh	124.056	740200000	256.011	5.11648e+11
France	Rosans	124.057	2.37363e+09	48	3.07623e+11
Iran	Takal Kuh	124.081	700500000	256.011	4.84206e+11
France	Rosans	124.087	7.48426e+08	48	9.6996e+10
Iran	Takal Kuh	124.105	697800000	256.011	4.8234e+11
France	Rosans	124.116	6.89667e+08	48	8.93808e+10
Iran	Takal Kuh	124.127	156000000	256.011	1.07832e+11
France	Rosans	124.146	5.49224e+08	48	7.11794e+10
Iran	Takal Kuh	124.151	384300000	256.011	2.6564e+11
France	Rosans	124.175	3.81867e+08	48	4.94899e+10
Iran	Takal Kuh	124.177	232900000	256.011	1.60987e+11
Iran	Takal Kuh	124.201	178700000	256.011	1.23523e+11
France	Rosans	124.205	4.08713e+08	26	2.86917e+10
Iran	Takal Kuh	124.224	326400000	256.011	2.25617e+11
France	Rosans	124.234	8.19e+08	26	5.74938e+10
Iran	Takal Kuh	124.241	496900000	256.011	3.43472e+11
Iran	Takal Kuh	124.262	426400000	256.011	2.9474e+11
France	Rosans	124.264	522576918	26	3.66849e+10
Iran	Takal Kuh	124.28	429800000	256.011	2.9709e+11
France	Rosans	124.293	1.07445e+09	26	7.54263e+10
Iran	Takal Kuh	124.296	543600000	256.011	3.75752e+11
Iran	Takal Kuh	124.312	5.127e+08	256.011	3.54393e+11
France	Rosans	124.323	6.1661e+08	26	4.3286e+10
Iran	Takal Kuh	124.328	428400000	256.011	2.96123e+11
Iran	Takal Kuh	124.346	414500000	256.011	2.86515e+11
France	Rosans	124.352	4.82489e+08	26	3.38707e+10
Iran	Takal Kuh	124.361	479100000	256.011	3.31168e+11
Iran	Takal Kuh	124.378	397100000	256.011	2.74487e+11
France	Rosans	124.382	1.04811e+09	26	7.35776e+10
Iran	Takal Kuh	124.395	297500000	256.011	2.05641e+11
France	Rosans	124.411	4.64938e+08	20	2.51066e+10
Iran	Takal Kuh	124.415	362500000	256.011	2.50571e+11
Iran	Takal Kuh	124.429	191600000	256.011	1.3244e+11
France	Rosans	124.441	3.30849e+08	20	1.78658e+10
Iran	Takal Kuh	124.444	543300000	256.011	3.75545e+11
Iran	Takal Kuh	124.464	263500000	256.011	1.82139e+11
France	Rosans	124.47	4.20761e+08	33	3.74898e+10
Iran	Takal Kuh	124.48	331400000	256.011	2.29073e+11
Iran	Takal Kuh	124.495	421000000	256.011	2.91008e+11
France	Rosans	124.5	2.1377e+08	33	1.90469e+10
Iran	Takal Kuh	124.511	524600000	256.011	3.62619e+11
Iran	Takal Kuh	124.525	591700000	256.011	4.09001e+11
France	Rosans	124.529	1.92898e+08	33	1.71872e+10
Iran	Takal Kuh	124.538	437200000	256.011	3.02206e+11
France	Rosans	124.559	1.1739e+08	38	1.20442e+10
Iran	Takal Kuh	124.562	388800000	256.011	2.6875e+11
Iran	Takal Kuh	124.572	387900000	256.011	2.68128e+11
Iran	Takal Kuh	124.583	405300000	256.011	2.80155e+11
Iran	Takal Kuh	124.594	353200000	256.011	2.44142e+11
Iran	Takal Kuh	124.605	293500000	256.011	2.02876e+11
Iran	Takal Kuh	124.62	454300000	256.011	3.14026e+11
Iran	Takal Kuh	124.63	365900000	256.011	2.52921e+11
Iran	Takal Kuh	124.642	327900000	256.011	2.26654e+11
France	Rosans	124.647	1.99224e+07	38	2.04403e+09
Iran	Takal Kuh	124.655	608400000	256.011	4.20544e+11
Iran	Takal Kuh	124.667	446400000	256.011	3.08565e+11
France	Rosans	124.677	284178	38	2.91566e+07
Iran	Takal Kuh	124.691	452600000	256.011	3.1285e+11
France	Rosans	124.706	1.66307e+06	38	1.70631e+08
Iran	Takal Kuh	124.714	345400000	256.011	2.38751e+11
Iran	Takal Kuh	124.724	285100000	256.011	1.9707e+11
Iran	Takal Kuh	124.733	352800000	256.011	2.43866e+11
France	Rosans	124.736	1.6713e+06	20	9.02504e+07
Iran	Takal Kuh	124.741	163400000	256.011	1.12947e+11
France	Rosans	124.765	3.12596e+06	20	1.68802e+08
France	Rosans	124.825	1.88917e+09	39	1.9893e+11
France	Rosans	124.884	3.94028e+08	39	4.14912e+10
France	Rosans	124.913	6.20846e+08	39	6.53751e+10
France	Rosans	124.943	1.1411e+09	39	1.20158e+11
France	Rosans	124.972	1.30011e+09	39	1.36902e+11
France	Rosans	125.031	4.41658e+08	39	4.65066e+10
France	Rosans	125.09	5.90926e+08	39	6.22245e+10
France	Rosans	125.149	1.73022e+09	26	1.21461e+11
France	Rosans	125.208	6.9442e+08	26	4.87483e+10
France	Rosans	125.267	8.83225e+08	26	6.20024e+10
France	Rosans	125.326	1118075580	27	8.15077e+10
France	Rosans	125.385	7.09179e+08	27	5.16992e+10
France	Rosans	125.444	1.83149e+09	27	1.33516e+11
France	Rosans	125.474	1.30697e+08	27	9.5278e+09
Germany	A39-Braunschweig	125.483	5.53337e+08	10.9677	1.63859e+10
France	Rosans	125.503	1.81032e+09	25	1.22197e+11
Germany	A39-Braunschweig	125.522	5.02271e+08	10.9677	1.48737e+10
France	Rosans	125.533	7.34047e+08	25	4.95482e+10
France	Rosans	125.562	1.61798e+09	25	1.09214e+11
Germany	A39-Braunschweig	125.575	8.09492e+08	10.9677	2.39714e+10
France	Rosans	125.592	6.99768e+08	25	4.72343e+10
Germany	A39-Braunschweig	125.597	7.78576e+08	10.9677	2.30559e+10
Germany	A39-Braunschweig	125.619	7.18385e+08	10.9677	2.12735e+10
France	Rosans	125.621	2.58158e+08	25	1.74256e+10
Germany	A39-Braunschweig	125.654	1.30191e+09	10.9677	3.85534e+10
France	Rosans	125.68	1.63951e+09	25	1.10667e+11
France	Rosans	125.71	1.99585e+08	26	1.40109e+10
Germany	A39-Braunschweig	125.725	1.68414e+09	10.9677	4.98724e+10
Danemark	North Jens-1	125.73	1680000000	27.7013	1.25653e+11
Germany	A39-Braunschweig	125.733	3.04403e+09	10.9677	9.01424e+10
Danemark	North Jens-1	125.75	1420000000	27.7013	1.06207e+11
Germany	A39-Braunschweig	125.76	1.73094e+09	10.9677	5.12582e+10
Germany	A39-Braunschweig	125.764	3.90562e+09	10.9677	1.15657e+11
France	Rosans	125.769	1.704e+09	26	1.19621e+11
Danemark	North Jens-1	125.771	230000000	27.7013	1.72025e+10
Germany	A39-Braunschweig	125.786	1.49074e+09	10.9677	4.41452e+10
Germany	A39-Braunschweig	125.799	2.04523e+09	10.9677	6.05653e+10
Germany	A39-Braunschweig	125.804	3.87601e+09	10.9677	1.1478e+11
Germany	A39-Braunschweig	125.808	1.39045e+09	10.9677	4.11752e+10
Germany	A39-Braunschweig	125.821	3.22282e+09	10.9677	9.5437e+10
Danemark	North Jens-1	125.824	840000000	27.7013	6.28265e+10
France	Rosans	125.828	1.07328e+08	26	7.53443e+09
Germany	A39-Braunschweig	125.83	7.73388e+08	10.9677	2.29023e+10
Danemark	North Jens-1	125.839	2610000000	27.7013	1.95211e+11
Danemark	North Jens-1	125.883	1140000000	27.7013	8.52645e+10
Danemark	North Jens-1	125.914	1800000000	27.7013	1.34628e+11
France	Rosans	125.917	6.23941e+08	26	4.38006e+10
Germany	A39-Braunschweig	125.922	1.2308e+09	10.9677	3.64476e+10
Danemark	North Jens-1	125.936	770000000	27.7013	5.7591e+10
Germany	A39-Braunschweig	125.944	1.56698e+09	10.9677	4.64029e+10
France	Rosans	125.946	1.76974e+08	26	1.24235e+10
Germany	A39-Braunschweig	125.975	3.36517e+08	10.9677	9.96524e+09
Danemark	North Jens-1	125.98	2740000000	27.7013	2.04934e+11
France	Rosans	126.005	6.47949e+08	26	4.5486e+10
France	Rosans	126.035	1.59997e+08	26	1.12318e+10
Germany	A39-Braunschweig	126.041	5.89279e+08	10.9677	1.74503e+10
France	Rosans	126.094	1.21151e+09	26	8.50477e+10
France	Rosans	126.123	12857936	26	9.02627e+08
France	Rosans	126.153	7.84615e+08	26	5.508e+10
Germany	A39-Braunschweig	126.173	1.39325e+09	10.9677	4.12581e+10
France	Rosans	126.241	3.27796e+08	26	2.30113e+10
Germany	A39-Braunschweig	126.3	1.93798e+09	23.5484	1.23218e+11
France	Rosans	126.33	9.63434e+08	26	6.7633e+10
Danemark	North Jens-1	126.374	4250000000	27.7013	3.17872e+11
Germany	A39-Braunschweig	126.397	1.37215e+09	23.5484	8.72422e+10
Danemark	North Jens-1	126.41	2690000000	11.6675	8.4741e+10
France	Rosans	126.418	3.00132e+08	26	2.10692e+10
Danemark	North Jens-1	126.478	2.11e+09	11.6675	6.64697e+10
France	Rosans	126.507	1.20037e+09	26	8.42658e+10
Danemark	North Jens-1	126.567	4290000000	11.6675	1.35144e+11
Danemark	North Jens-1	126.64	5580000000	11.6675	1.75782e+11
North Sea	BGS81/43	126.645	4.28e+09	3.61111	4.173e+10
Germany	A39-Braunschweig	126.669	1.30231e+09	23.5484	8.28015e+10
Danemark	North Jens-1	126.713	5630000000	11.6675	1.77357e+11
Germany	A39-Braunschweig	126.722	1.65966e+09	23.5484	1.05522e+11
North Sea	BGS81/43	126.728	5100000000	3.61111	4.9725e+10
Germany	A39-Braunschweig	126.761	2.08123e+09	23.5484	1.32326e+11
Danemark	North Jens-1	126.786	3760000000	11.6675	1.18448e+11
Danemark	North Jens-1	126.854	3080000000	11.6675	9.70268e+10
North Sea	BGS81/43	126.88	4700000000	3.61111	4.5825e+10
Danemark	North Jens-1	126.935	1410000000	11.6675	4.44181e+10
Danemark	North Jens-1	127.016	1170000000	11.6675	3.68576e+10
North Sea	BGS81/43	127.027	2400000000	3.61111	2.34e+10
Danemark	North Jens-1	127.097	980000000	11.6675	3.08722e+10
Danemark	North Jens-1	127.102	920000000	11.6675	2.8982e+10
Danemark	North Jens-1	127.157	1030000000	11.6675	3.24473e+10
Danemark	North Jens-1	127.236	1750000000	11.6675	5.51289e+10
Danemark	North Jens-1	127.301	1950000000	11.6675	6.14293e+10
North Sea	BGS81/43	127.304	1300000000	3.61111	1.2675e+10
Danemark	North Jens-1	127.418	1500000000	11.6675	4.72533e+10
Danemark	North Jens-1	127.447	940000000	11.6675	2.96121e+10
North Sea	BGS81/43	127.462	3980000000	3.61111	3.8805e+10
Danemark	North Jens-1	127.497	890000000	11.6675	2.8037e+10
Danemark	North Jens-1	127.533	820000000	11.6675	2.58318e+10
North Sea	BGS81/43	127.581	3400000000	3.61111	3.315e+10
Danemark	North Jens-1	127.599	1290000000	11.6675	4.06379e+10
Danemark	Nora-1	127.742	977000000	7.10682	1.87471e+10
Danemark	Nora-1	127.776	719000000	7.10682	1.37965e+10
North Sea	BGS81/43	127.863	4.1e+09	3.61111	3.9975e+10
Germany	A39-Braunschweig	127.921	1.3726e+09	23.5484	8.72709e+10
Danemark	Nora-1	127.922	768000000	7.10682	1.47367e+10
Danemark	Nora-1	127.969	889000000	7.10682	1.70585e+10
Danemark	Nora-1	128.063	1125000000	7.10682	2.1587e+10
Germany	A39-Braunschweig	128.075	2.39351e+09	23.5484	1.52181e+11
Germany	A39-Braunschweig	128.083	6.4352e+08	23.5484	4.09154e+10
UK	Speeton	128.093	199000000	26.4957	1.42362e+10
Danemark	Nora-1	128.106	986000000	7.10682	1.89198e+10
UK	Speeton	128.144	290000000	26.4957	2.07462e+10
UK	Speeton	128.204	649000000	26.4957	4.64285e+10
Danemark	Nora-1	128.205	1236000000	7.10682	2.37169e+10
UK	Speeton	128.272	709000000	26.4957	5.07208e+10
North Sea	BGS81/43	128.292	3200000000	3.61111	3.12e+10
Danemark	Nora-1	128.338	2151000000	7.10682	4.12743e+10
UK	Speeton	128.357	497000000	26.4957	3.55546e+10
Danemark	Nora-1	128.385	1717000000	7.10682	3.29465e+10
UK	Speeton	128.416	829000000	26.4957	5.93054e+10
North Sea	BGS81/43	128.417	2.05e+09	3.61111	1.99875e+10
Germany	A39-Braunschweig	128.452	1.51858e+09	23.5484	9.65526e+10
UK	Speeton	128.484	166000000	26.4957	1.18754e+10
Danemark	Nora-1	128.514	904000000	7.10682	1.73463e+10
UK	Speeton	128.543	423000000	26.4957	3.02608e+10
North Sea	BGS81/43	128.583	1800000000	3.61111	1.755e+10
UK	Speeton	128.586	150000000	26.4957	1.07308e+10
Danemark	Nora-1	128.651	883000000	7.10682	1.69434e+10
UK	Speeton	128.696	124000000	26.4957	8.87077e+09
Danemark	Nora-1	128.737	648000000	7.10682	1.24341e+10
Danemark	Nora-1	128.762	695000000	7.10682	1.3336e+10
UK	Speeton	128.824	111000000	26.4957	7.94077e+09
Danemark	Nora-1	128.848	1.053e+09	7.10682	2.02054e+10
North Sea	BGS81/43	128.86	1700000000	3.61111	1.6575e+10
UK	Speeton	128.866	124000000	26.4957	8.87077e+09
UK	Speeton	128.951	99500000	26.4957	7.11808e+09
Danemark	Nora-1	128.977	1808000000	7.10682	3.46927e+10
Germany	A39-Braunschweig	129.015	6.24141e+08	23.5484	3.96833e+10
Danemark	Nora-1	129.05	1137000000	7.10682	2.18172e+10
Germany	A39-Braunschweig	129.076	2.42044e+09	23.5484	1.53893e+11
Germany	A39-Braunschweig	129.142	2.55943e+09	23.5484	1.6273e+11
North Sea	BGS81/43	129.151	1000000000	3.61111	9.75e+09
Germany	A39-Braunschweig	129.177	1.62315e+09	23.5484	1.03201e+11
Germany	A39-Braunschweig	129.186	2.8307e+09	23.5484	1.79978e+11
UK	Speeton	129.189	622000000	26.4957	4.44969e+10
Danemark	Nora-1	129.195	731000000	7.10682	1.40267e+10
Germany	A39-Braunschweig	129.221	2.52964e+09	23.5484	1.60836e+11
Germany	A39-Braunschweig	129.252	2.20497e+09	23.5484	1.40193e+11
Germany	Otto Gott	129.267	3750000000	11.2121	1.13523e+11
North Sea	BGS81/43	129.275	2250000000	3.61111	2.19375e+10
Germany	A39-Braunschweig	129.278	2.52006e+09	23.5484	1.60227e+11
Germany	A39-Braunschweig	129.296	1.32071e+09	23.5484	8.39714e+10
UK	Speeton	129.3	580000000	26.4957	4.14923e+10
Germany	Otto Gott	129.313	899000000	11.2121	2.72152e+10
Germany	A39-Braunschweig	129.318	2.13002e+09	23.5484	1.35428e+11
Danemark	Nora-1	129.32	978000000	7.10682	1.87663e+10
Germany	A39-Braunschweig	129.331	2.34612e+09	23.5484	1.49168e+11
Germany	A39-Braunschweig	129.357	1.54187e+09	5	2.08152e+10
UK	Speeton	129.368	304000000	26.4957	2.17477e+10
Danemark	Nora-1	129.371	1518000000	7.10682	2.9128e+10
Germany	A39-Braunschweig	129.41	1.25909e+09	5	1.69977e+10
Germany	Otto Gott	129.41	1530000000	11.2121	4.63173e+10
North Sea	BGS81/43	129.414	4300000000	3.61111	4.1925e+10
Danemark	Nora-1	129.427	1797000000	7.10682	3.44816e+10
UK	Speeton	129.427	1800000000	26.4957	1.28769e+11
Germany	A39-Braunschweig	129.454	1.25571e+09	5	1.69521e+10
Germany	A39-Braunschweig	129.463	8.38457e+08	5	1.13192e+10
Germany	A39-Braunschweig	129.485	1.28715e+09	5	1.73765e+10
Danemark	Nora-1	129.491	1084000000	7.10682	2.08002e+10
UK	Speeton	129.495	235000000	26.4957	1.68115e+10
Germany	A39-Braunschweig	129.507	1.14472e+09	5	1.54537e+10
Germany	A39-Braunschweig	129.529	2.04721e+09	5	2.76374e+10
Germany	Otto Gott	129.537	1820000000	16.2393	7.98e+10
Germany	A39-Braunschweig	129.551	2.07614e+09	5	2.80279e+10
North Sea	BGS81/43	129.552	4900000000	3.61111	4.7775e+10
Danemark	Nora-1	129.56	2076000000	7.10682	3.98352e+10
Germany	Otto Gott	129.569	1310000000	16.2393	5.74385e+10
Germany	A39-Braunschweig	129.573	2.05929e+09	5	2.78004e+10
Germany	Otto Gott	129.585	845000000	16.2393	3.705e+10
Germany	A39-Braunschweig	129.594	1.09598e+09	5	1.47957e+10
Germany	A39-Braunschweig	129.608	1.18691e+09	5	1.60233e+10
Germany	A39-Braunschweig	129.638	1.91399e+09	5	2.58389e+10
Germany	Otto Gott	129.673	1180000000	16.2393	5.17385e+10
Germany	A39-Braunschweig	129.678	6.21196e+08	5	8.38614e+09
North Sea	BGS81/43	129.691	3600000000	3.61111	3.51e+10
Germany	A39-Braunschweig	129.691	1.2064e+09	5	1.62865e+10
UK	Speeton	129.716	448000000	26.4957	3.20492e+10
Germany	A39-Braunschweig	129.717	1.32518e+09	5	1.78899e+10
Germany	Otto Gott	129.725	3440000000	16.2393	1.50831e+11
Germany	Otto Gott	129.78	771000000	16.2393	3.38054e+10
Germany	A39-Braunschweig	129.783	2.74303e+09	5	3.70309e+10
Germany	Otto Gott	129.822	442000000	16.2393	1.938e+10
North Sea	BGS81/43	129.829	6000000000	3.61111	5.85e+10
Germany	A39-Braunschweig	129.836	1.64171e+09	5	2.21631e+10
Germany	Otto Gott	129.855	1700000000	16.2393	7.45385e+10
Germany	A39-Braunschweig	129.858	2.03866e+09	5	2.75219e+10
Germany	A39-Braunschweig	129.884	2.4864e+09	5	3.35664e+10
UK	Speeton	129.886	689000000	26.4957	4.929e+10
Germany	A39-Braunschweig	129.911	1.98248e+09	5	2.67635e+10
Germany	Otto Gott	129.92	485000000	16.2393	2.12654e+10
UK	Speeton	129.929	137000000	26.4957	9.80077e+09
UK	Speeton	129.971	836000000	26.4957	5.98062e+10
Germany	Otto Gott	129.985	304000000	16.2393	1.33292e+10
North Sea	BGS81/43	129.995	5150000000	3.61111	5.02125e+10
UK	Speeton	130.048	162000000	26.4957	1.15892e+10
Germany	Otto Gott	130.056	760000000	16.2393	3.33231e+10
UK	Speeton	130.056	166000000	26.4957	1.18754e+10
UK	Speeton	130.09	1170000000	26.4957	8.37e+10
UK	Speeton	130.107	1290000000	26.4957	9.22846e+10
Germany	Otto Gott	130.114	348000000	16.2393	1.52585e+10
North Sea	BGS81/43	130.12	3900000000	3.61111	3.8025e+10
Germany	Otto Gott	130.179	511000000	16.2393	2.24054e+10
Germany	Otto Gott	130.208	428000000	16.2393	1.87662e+10
Germany	Otto Gott	130.234	38300000	16.2393	1.67931e+09
Germany	Otto Gott	130.257	74600000	16.2393	3.27092e+09
UK	Speeton	130.269	1510000000	26.4957	1.08023e+11
North Sea	BGS81/43	130.286	3850000000	3.61111	3.75375e+10
Germany	Otto Gott	130.319	218000000	16.2393	9.55846e+09
UK	Speeton	130.328	1090000000	26.4957	7.79769e+10
Germany	Otto Gott	130.348	691000000	16.2393	3.02977e+10
Germany	Otto Gott	130.35	82900000	16.2393	3.63485e+09
Germany	Otto Gott	130.364	45200000	16.2393	1.98185e+09
UK	Speeton	130.388	1600000000	26.4957	1.14462e+11
Germany	Otto Gott	130.393	609000000	16.2393	2.67023e+10
Germany	Otto Gott	130.403	1520000000	16.2393	6.66462e+10
UK	Speeton	130.405	1910000000	26.4957	1.36638e+11
North Sea	BGS81/43	130.425	3700000000	3.61111	3.6075e+10
Germany	Otto Gott	130.429	1400000000	16.2393	6.13846e+10
Germany	Otto Gott	130.462	348000000	16.2393	1.52585e+10
UK	Speeton	130.49	497000000	26.4957	3.55546e+10
UK	Speeton	130.515	1010000000	26.4957	7.22538e+10
Germany	Otto Gott	130.527	249000000	16.2393	1.09177e+10
UK	Speeton	130.549	1200000000	26.4957	8.58462e+10
Germany	Otto Gott	130.566	388000000	16.2393	1.70123e+10
Germany	Otto Gott	130.588	82900000	16.2393	3.63485e+09
UK	Speeton	130.592	1040000000	26.4957	7.44e+10
Germany	Otto Gott	130.601	2600000000	16.2393	1.14e+11
UK	Speeton	130.617	2210000000	26.4957	158100000000
Germany	Otto Gott	130.617	318000000	16.2393	1.39431e+10
Germany	Otto Gott	130.647	1560000000	16.2393	6.84e+10
UK	Speeton	130.668	2520000000	26.4957	1.80277e+11
Germany	Otto Gott	130.673	580000000	16.2393	2.54308e+10
North Sea	BGS81/43	130.688	2300000000	3.61111	2.2425e+10
UK	Speeton	130.694	1860000000	26.4957	1.33062e+11
Germany	Otto Gott	130.699	1690000000	16.2393	7.41e+10
UK	Speeton	130.702	2360000000	26.4957	1.68831e+11
Germany	Otto Gott	130.712	111000000	16.2393	4.86692e+09
UK	Speeton	130.719	1930000000	26.4957	1.38069e+11
Germany	Otto Gott	130.738	1200000000	16.2393	5.26154e+10
Germany	Otto Gott	130.751	884000000	16.2393	3.876e+10
UK	Speeton	130.77	2360000000	26.4957	1.68831e+11
Germany	Otto Gott	130.77	3230000000	16.2393	1.41623e+11
North Sea	BGS81/43	130.785	2800000000	3.61111	2.73e+10
UK	Speeton	130.795	3030000000	20.2963	166044000000
UK	Speeton	130.855	1130000000	20.2963	6.1924e+10
UK	Speeton	130.872	203000000	20.2963	11124400000
UK	Speeton	130.906	23300000	20.2963	1276840000
UK	Speeton	130.906	771000000	20.2963	42250800000
North Sea	BGS81/43	130.909	2700000000	3.61111	2.6325e+10
North Sea	BGS81/43	130.913	3840000000	12.0593	1.71509e+10
[truncated: 1,896 more rows]

## Sheet: LSinemur. SaoPedrodeMoel
Country	Site	Stage, sub-stage	Ammonite zone	Nannofossil zone	Age (Ma)	Nannofossil Absolute Abundance (nanno/g)	Sedimentation rate (m/Myr)	Nannofossil AR (nanno/m²/yr)	Sample	Height (m)	References
Portugal	Sao Pedro de Moel	Early Pliensbachian	Jamesoni	NJT4a	187.703	2.3396e+08	13	8.21201e+09	SPMA	84.7	J. Plancq, E. Mattioli, B. Pittet, F. Baudin, L. V. Duarte, M. Boussaha, V. Grossi, A calcareous nannofossil and organic geochemical study of marine palaeoenvironmental changes across the Sinemurian/Pliensbachian (early Jurassic, ~ 191 Ma) in Portugal. Palaeogeography, Palaeoclimatology, Palaeoecology 449, 1-12 (2016)
Portugal	Sao Pedro de Moel	Early Pliensbachian	Jamesoni	NJT4a	187.944	1.39353e+08	13	4.89129e+09	SPM101	82.1
Portugal	Sao Pedro de Moel	Early Pliensbachian	Jamesoni	NJT4a	188.13	1.2657e+08	13	4.44261e+09	SPM103	80.1
Portugal	Sao Pedro de Moel	Early Pliensbachian	Jamesoni	NJT4a	188.428	1.91821e+08	13	6.7329e+09	SPM105	76.9
Portugal	Sao Pedro de Moel	Early Pliensbachian	Jamesoni	NJT4a	188.874	3.78681e+07	13	1.32917e+09	SPM106	72.1
Portugal	Sao Pedro de Moel	Early Pliensbachian	Jamesoni	NJT4a	189.153	2.38495e+08	13	8.37118e+09	SPM100	69.1
Portugal	Sao Pedro de Moel	Early Pliensbachian	Jamesoni	NJT3b	189.223	6.75218e+07	13	2.37001e+09	SPM98	68.34
Portugal	Sao Pedro de Moel	Early Pliensbachian	Jamesoni	NJT3b	189.267	1.91203e+09	13	6.71122e+10	SPMB = 93	67.87
Portugal	Sao Pedro de Moel	Early Pliensbachian	Jamesoni	NJT3b	189.296	1.80321e+06	13	6.32928e+07	SPM90	67.56
Portugal	Sao Pedro de Moel	Early Pliensbachian	Jamesoni	NJT3b	189.316	5.52921e+07	13	1.94075e+09	SPM89	67.34
Portugal	Sao Pedro de Moel	Early Pliensbachian	Jamesoni	NJT3b	189.322	1.20042e+07	13	4.21348e+08	SPM88	67.28
Portugal	Sao Pedro de Moel	Early Pliensbachian	Jamesoni	NJT3b	189.381	8.88192e+08	13	3.11755e+10	SPMC = 84	66.64
Portugal	Sao Pedro de Moel	Early Pliensbachian	Jamesoni	NJT3b	189.453	2.93146e+07	13	1.02894e+09	SPM81	65.87
Portugal	Sao Pedro de Moel	Early Pliensbachian	Jamesoni	NJT3b	189.612	1.14196e+07	22	6.78327e+08	SPM75	64.16
Portugal	Sao Pedro de Moel	Early Pliensbachian	Jamesoni	NJT3b	189.639	1.64314e+08	22	9.76027e+09	SPME = 74	63.87
Portugal	Sao Pedro de Moel	Early Pliensbachian	Jamesoni	NJT3b	189.701	2.38997e+07	22	1.41964e+09	SPM71	63.2
Portugal	Sao Pedro de Moel	Early Pliensbachian	Jamesoni	NJT3b	189.737	7.85691e+06	22	4.667e+08	SPM69	62.81
Portugal	Sao Pedro de Moel	Early Pliensbachian	Jamesoni	NJT3b	189.865	5.32953e+06	22	3.16574e+08	SPM66	61.44
Portugal	Sao Pedro de Moel	Early Pliensbachian	Jamesoni	NJT3b	189.957	1.08792e+06	22	6.46224e+07	SPM64	60.44
Portugal	Sao Pedro de Moel	Early Pliensbachian	Jamesoni	NJT3b	189.984	1.26222e+06	22	7.49761e+07	SPM63 = F	60.15
Portugal	Sao Pedro de Moel	Early Pliensbachian	Jamesoni	NJT3b	190.661	4.08389e+06	22	2.42583e+08	SPM61	52.87
Portugal	Sao Pedro de Moel	Early Pliensbachian	Jamesoni	NJT3b	190.693	1.06681e+09	22	6.33683e+10	SPM59 = D	52.53
Portugal	Sao Pedro de Moel	Early Pliensbachian	Jamesoni	NJT3b	190.719	1.81367e+09	22	1.07732e+11	SPMH	52.25
Portugal	Sao Pedro de Moel	Early Pliensbachian	Jamesoni	NJT3b	190.727	9.61901e+07	22	5.71369e+09	SPM56	52.16
Portugal	Sao Pedro de Moel	Early Pliensbachian	Jamesoni	NJT3b	190.82	7.36103e+07	22	4.37245e+09	SPM51 = G	51.16
Portugal	Sao Pedro de Moel	Late Sinemurian	Raricostatum	NJT3b	190.927	1.5951e+08	22	9.47488e+09	SPM46	50.01
Portugal	Sao Pedro de Moel	Late Sinemurian	Raricostatum	NJT3b	191.048	2.37825e+07	22	1.41268e+09	SPM41	48.71
Portugal	Sao Pedro de Moel	Late Sinemurian	Raricostatum	NJT3b	191.073	9.82819e+07	22	5.83795e+09	SPM40	48.44
Portugal	Sao Pedro de Moel	Late Sinemurian	Raricostatum	NJT3b	191.153	9.15259e+08	22	5.43664e+10	SPMJ	47.58
Portugal	Sao Pedro de Moel	Late Sinemurian	Raricostatum	NJT3b	191.166	1.54574e+08	22	9.1817e+09	SPM37 = I	47.44
Portugal	Sao Pedro de Moel	Late Sinemurian	Raricostatum	NJT3b	191.325	1.71161e+08	22	1.01669e+10	SPM31	45.73
Portugal	Sao Pedro de Moel	Late Sinemurian	Raricostatum	NJT3b	191.379	2.48607e+09	22	1.47673e+11	SPMK = 28	45.15
Portugal	Sao Pedro de Moel	Late Sinemurian	Raricostatum	NJT3b	191.445	2.89834e+08	22	1.72161e+10	SPM26	44.44
Portugal	Sao Pedro de Moel	Late Sinemurian	Raricostatum	NJT3b	191.538	8.76741e+08	22	5.20784e+10	SPML	43.44
Portugal	Sao Pedro de Moel	Late Sinemurian	Raricostatum	NJT3b	191.604	3.18846e+08	22	1.89394e+10	SPM20	42.73
Portugal	Sao Pedro de Moel	Late Sinemurian	Raricostatum	NJT3b	191.671	8.66068e+08	22	5.14445e+10	SPM OU 225c	42
Portugal	Sao Pedro de Moel	Late Sinemurian	Raricostatum	NJT3b	191.71	2.41393e+08	22	1.43387e+10	SPM15	41.58
Portugal	Sao Pedro de Moel	Late Sinemurian	Raricostatum	NJT3b	191.841	2.91838e+08	22	1.73352e+10	SPM11	40.17
Portugal	Sao Pedro de Moel	Late Sinemurian	Raricostatum	NJT3b	191.857	3.23226e+07	22	1.91997e+09	SPM OU 221b	40
Portugal	Sao Pedro de Moel	Late Sinemurian	Raricostatum	NJT3b	191.876	4.46178e+07	22	2.65029e+09	SPM OU 218	39.8
Portugal	Sao Pedro de Moel	Late Sinemurian	Raricostatum	NJT3b	191.96	5.42393e+08	22	3.22181e+10	SPM OU 214b	38.9
Portugal	Sao Pedro de Moel	Late Sinemurian	Raricostatum	NJT3b	191.999	2.69778e+08	22	1.60248e+10	SPMM	38.48
Portugal	Sao Pedro de Moel	Late Sinemurian	Raricostatum	NJT3b	192.006	2.60499e+08	22	1.54737e+10	SPM OU 211	38.4
Portugal	Sao Pedro de Moel	Late Sinemurian	Raricostatum	NJT3b	192.015	1.60879e+08	22	9.55621e+09	SPM6	38.3
Portugal	Sao Pedro de Moel	Late Sinemurian	Raricostatum	NJT3b	192.034	1.10543e+08	22	6.56628e+09	SPM OU 210	38.1
Portugal	Sao Pedro de Moel	Late Sinemurian	Raricostatum	NJT3b	192.095	1.18954e+09	22	7.06588e+10	SPMN = 4	37.44
Portugal	Sao Pedro de Moel	Late Sinemurian	Raricostatum	NJT3b	192.171	1.67826e+08	22	9.96885e+09	SPM2	36.62
Portugal	Sao Pedro de Moel	Late Sinemurian	Raricostatum	NJT3b	192.457	2.99994e+06	22	1.78197e+08	PDO 94	33.55
Portugal	Sao Pedro de Moel	Late Sinemurian	Raricostatum	NJT3b	192.471	7.7811e+06	22	4.62198e+08	PDO 92	33.4
Portugal	Sao Pedro de Moel	Late Sinemurian	Raricostatum	NJT3b	192.475	2.99994e+06	22	1.78197e+08	PDO 91	33.35
Portugal	Sao Pedro de Moel	Late Sinemurian	Raricostatum	NJT3b	192.489	4.96693e+08	22	2.95036e+10	SPM OU 193	33.2
Portugal	Sao Pedro de Moel	Late Sinemurian	Raricostatum	NJT3b	192.527	2.49995e+06	22	1.48497e+08	PDO 89	32.8
Portugal	Sao Pedro de Moel	Late Sinemurian	Raricostatum	NJT3b	192.596	4.79023e+06	22	2.8454e+08	PDO 87	32.05
Portugal	Sao Pedro de Moel	Late Sinemurian	Raricostatum	NJT3b	192.619	1.62528e+08	22	9.65416e+09	SPM OU 187	31.8
Portugal	Sao Pedro de Moel	Late Sinemurian	Raricostatum	NJT3b	192.68	6.72824e+06	22	3.99657e+08	PDO 84	31.15
Portugal	Sao Pedro de Moel	Late Sinemurian	Raricostatum	NJT3b	192.694	3.39669e+08	22	2.01763e+10	SPM OU 182	31
Portugal	Sao Pedro de Moel	Late Sinemurian	Raricostatum	NJT3b	192.759	2.28625e+07	22	1.35803e+09	PDO 81	30.3
Portugal	Sao Pedro de Moel	Late Sinemurian	Raricostatum	NJT3b	192.787	4.50991e+07	22	2.67889e+09	PDO 80	30
Portugal	Sao Pedro de Moel	Late Sinemurian	Raricostatum	NJT3b	192.81	9.18733e+06	22	5.45727e+08	PDO 79	29.75
Portugal	Sao Pedro de Moel	Late Sinemurian	–	NJT3b	192.889	2.16996e+07	22	1.28896e+09	PDO 76	28.9
Portugal	Sao Pedro de Moel	Late Sinemurian	–	NJT3b	192.889	8.29984e+06	22	4.93011e+08	PDO 76*	28.9
Portugal	Sao Pedro de Moel	Late Sinemurian	–	NJT3b	192.894	1.52997e+07	22	9.08803e+08	PDO 75	28.85
Portugal	Sao Pedro de Moel	Late Sinemurian	–	NJT3a	192.903	3.59993e+06	22	2.13836e+08	PDO 74	28.75
Portugal	Sao Pedro de Moel	Late Sinemurian	–	NJT3a	192.912	2.00396e+07	22	1.19035e+09	PDO 73	28.65
Portugal	Sao Pedro de Moel	Late Sinemurian	–	NJT3a	192.935	1.49763e+07	22	8.89591e+08	PDO 72	28.4
Portugal	Sao Pedro de Moel	Late Sinemurian	–	NJT3a	192.949	1.36549e+07	22	8.11102e+08	PDO 71	28.25
Portugal	Sao Pedro de Moel	Late Sinemurian	–	NJT3a	193.135	4.79991e+06	22	2.85115e+08	PDO 70	26.25
Portugal	Sao Pedro de Moel	Late Sinemurian	–	NJT3a	193.145	4.27265e+06	22	2.53795e+08	PDO 69	26.15
Portugal	Sao Pedro de Moel	Late Sinemurian	–	NJT3a	193.154	4.16121e+06	22	2.47176e+08	PDO 67	26.05
Portugal	Sao Pedro de Moel	Late Sinemurian	–	NJT3a	193.182	3.93743e+06	22	2.33883e+08	PDO 66	25.75
Portugal	Sao Pedro de Moel	Late Sinemurian	–	NJT3a	193.205	7.69985e+06	22	4.57371e+08	PDO 65	25.5
Portugal	Sao Pedro de Moel	Late Sinemurian	–	NJT3a	193.251	2.8928e+06	22	1.71832e+08	PDO 63	25
Portugal	Sao Pedro de Moel	Late Sinemurian	–	NJT3a	193.261	1.83867e+06	22	1.09217e+08	PDO 62	24.9
Portugal	Sao Pedro de Moel	Late Sinemurian	–	NJT3a	193.298	2.29996e+06	22	1.36617e+08	PDO 60	24.5
Portugal	Sao Pedro de Moel	Late Sinemurian	–	NJT3a	193.307	1.68747e+06	22	1.00236e+08	PDO 59	24.4
Portugal	Sao Pedro de Moel	Late Sinemurian	–	NJT3a	193.372	3.28119e+06	22	1.94903e+08	PDO 55	23.7
Portugal	Sao Pedro de Moel	Late Sinemurian	–	NJT3a	193.391	2.49995e+06	22	1.48497e+08	PDO 54	23.5
Portugal	Sao Pedro de Moel	Late Sinemurian	Oxynotum	NJT3a	193.423	674987	22	4.00942e+07	PDO 53	23.15
Portugal	Sao Pedro de Moel	Late Sinemurian	Oxynotum	NJT3a	193.437	1.68747e+06	22	1.00236e+08	PDO 52	23
Portugal	Sao Pedro de Moel	Late Sinemurian	Oxynotum	NJT3a	193.502	1.64997e+06	22	9.80081e+07	PDO 50	22.3
Portugal	Sao Pedro de Moel	Late Sinemurian	Oxynotum	NJT3a	193.523	1.96871e+06	22	1.16942e+08	PDO49	22.08
Portugal	Sao Pedro de Moel	Late Sinemurian	Oxynotum	NJT3a	193.572	4.39992e+06	22	2.61355e+08	PDO 45	21.55
Portugal	Sao Pedro de Moel	Late Sinemurian	Oxynotum	NJT3a	193.642	4.35781e+06	22	2.58854e+08	PDO 43	20.8
Portugal	Sao Pedro de Moel	Late Sinemurian	Oxynotum	NJT3a	193.716	6.79399e+06	22	4.03563e+08	PDO 38	20

## Sheet: EPliensbach. Peniche
Country	Site	Stage, sub-stage	Ammonite zone	Nannofossil zone	Age (Ma)	Nannofossil Absolute Abundance (nanno/g)	Sedimentation rate (m/Myr)	Nannofossil AR (nanno/m²/yr)	Sample	Height (m)	References
Portugal	Peniche	Early Pliensbachian	Ibex	NJT4	189.241	4.67213e+06	16	2.01836e+08	249	12.59	Mattioli, E. Unpublished
Portugal	Peniche	Early Pliensbachian	Ibex	NJT4	189.246	6.31392e+07	16	2.72761e+09	247	12.4875	Pittet, B. Unpublished
Portugal	Peniche	Early Pliensbachian	Ibex	NJT4	189.251	1.67767e+08	16	7.24754e+09	245	12.386
Portugal	Peniche	Early Pliensbachian	Ibex	NJT4	189.256	1.05984e+08	16	4.5785e+09	243	12.2835
Portugal	Peniche	Early Pliensbachian	Ibex	NJT4	189.261	8.61315e+07	16	3.72088e+09	241	12.1822
Portugal	Peniche	Early Pliensbachian	Ibex	NJT4	189.266	5.72879e+07	16	2.47484e+09	239	12.0811
Portugal	Peniche	Early Pliensbachian	Ibex	NJT4	189.271	1.03585e+08	16	4.47487e+09	237	11.98
Portugal	Peniche	Early Pliensbachian	Ibex	NJT4	189.276	8.75005e+07	16	3.78002e+09	235	11.8789
Portugal	Peniche	Early Pliensbachian	Ibex	NJT4	189.281	9.41222e+07	16	4.06608e+09	233	11.7778
Portugal	Peniche	Early Pliensbachian	Ibex	NJT4	189.285	1.28127e+08	16	5.53508e+09	231	11.6767
Portugal	Peniche	Early Pliensbachian	Ibex	NJT4	189.29	1.98197e+08	16	8.5621e+09	229	11.5756
Portugal	Peniche	Early Pliensbachian	Ibex	NJT4	189.293	1.53411e+07	16	6.62738e+08	228	11.525
Portugal	Peniche	Early Pliensbachian	Ibex	NJT4	189.295	2.82111e+07	16	1.21872e+09	227	11.4744
Portugal	Peniche	Early Pliensbachian	Ibex	NJT4	189.3	1.16469e+08	16	5.03145e+09	225	11.3733
Portugal	Peniche	Early Pliensbachian	Ibex	NJT4	189.305	9.54337e+07	16	4.12273e+09	223	11.2722
Portugal	Peniche	Early Pliensbachian	Ibex	NJT4	189.31	1.14073e+08	16	4.92797e+09	221	11.1711
Portugal	Peniche	Early Pliensbachian	Ibex	NJT4	189.315	1.69346e+08	16	7.31573e+09	219	11.07
Portugal	Peniche	Early Pliensbachian	Ibex	NJT4	189.32	1.67805e+08	16	7.24918e+09	217	10.9689
Portugal	Peniche	Early Pliensbachian	Ibex	NJT4	189.323	3.75913e+07	16	1.62394e+09	216	10.9185
Portugal	Peniche	Early Pliensbachian	Ibex	NJT4	189.325	5.69975e+07	16	2.46229e+09	215	10.8678
Portugal	Peniche	Early Pliensbachian	Ibex	NJT4	189.33	2.85205e+08	16	1.23208e+10	213	10.7667
Portugal	Peniche	Early Pliensbachian	Ibex	NJT4	189.335	3.91886e+08	16	1.69295e+10	211	10.6656
Portugal	Peniche	Early Pliensbachian	Ibex	NJT4	189.34	1.70575e+08	16	7.36885e+09	209	10.5645
Portugal	Peniche	Early Pliensbachian	Ibex	NJT4	189.345	5.70426e+07	16	2.46424e+09	207	10.4634
Portugal	Peniche	Early Pliensbachian	Jamesoni	NJT4	189.35	2.92107e+07	16	1.2619e+09	205	10.3623
Portugal	Peniche	Early Pliensbachian	Jamesoni	NJT4	189.355	2.30761e+08	16	9.96889e+09	203	10.2612
Portugal	Peniche	Early Pliensbachian	Jamesoni	NJT4	189.359	3.44979e+08	16	1.49031e+10	201	10.1601
Portugal	Peniche	Early Pliensbachian	Jamesoni	NJT4	189.364	1.51359e+08	16	6.53871e+09	199	10.059
Portugal	Peniche	Early Pliensbachian	Jamesoni	NJT4	189.368	1.01426e+08	16	4.3816e+09	197	9.95793
Portugal	Peniche	Early Pliensbachian	Jamesoni	NJT4	189.373	9.24258e+07	16	3.9928e+09	195	9.85683
Portugal	Peniche	Early Pliensbachian	Jamesoni	NJT4	189.375	8.79241e+07	16	3.79832e+09	194	9.8065
Portugal	Peniche	Early Pliensbachian	Jamesoni	NJT4	189.377	6.45246e+07	16	2.78746e+09	193	9.75573
Portugal	Peniche	Early Pliensbachian	Jamesoni	NJT4	189.382	1.1515e+08	16	4.97449e+09	191	9.65463
Portugal	Peniche	Early Pliensbachian	Jamesoni	NJT4	189.389	2.37903e+08	16	1.02774e+10	188	9.50297
Portugal	Peniche	Early Pliensbachian	Jamesoni	NJT4	189.391	1.46105e+08	16	6.31174e+09	187	9.45242
Portugal	Peniche	Early Pliensbachian	Jamesoni	NJT4	189.393	2.83185e+08	16	1.22336e+10	186	9.40187
Portugal	Peniche	Early Pliensbachian	Jamesoni	NJT4	189.396	3.16153e+08	16	1.36578e+10	185	9.35132
Portugal	Peniche	Early Pliensbachian	Jamesoni	NJT4	189.398	2.70676e+08	16	1.16932e+10	184	9.30077
Portugal	Peniche	Early Pliensbachian	Jamesoni	NJT4	189.4	1.96348e+08	16	8.48224e+09	183	9.25022
Portugal	Peniche	Early Pliensbachian	Jamesoni	NJT4	189.403	2.6748e+08	16	1.15551e+10	182	9.19967
Portugal	Peniche	Early Pliensbachian	Jamesoni	NJT4	189.405	1.56351e+08	16	6.75438e+09	181	9.14912
Portugal	Peniche	Early Pliensbachian	Jamesoni	NJT4	189.407	2.40808e+08	16	1.04029e+10	180	9.09857
Portugal	Peniche	Early Pliensbachian	Jamesoni	NJT4	189.409	1.9927e+07	16	8.60847e+08	179	9.04802
Portugal	Peniche	Early Pliensbachian	Jamesoni	NJT4	189.412	1.41611e+08	16	6.11759e+09	178	8.99747
Portugal	Peniche	Early Pliensbachian	Jamesoni	NJT4	189.414	1.02979e+08	16	4.44869e+09	177	8.94692

## Sheet: E–LPliensbach. Peniche
Country	Site	Stage, sub-stage	Ammonite zone	Nannofossil zone	Age (Ma)	Nannofossil Absolute Abundance (nanno/g)	Sedimentation rate (m/Myr)	Nannofossil AR (nanno/m²/yr)	Sample	Height (m)	References
Portugal	Peniche	Late Pliensbachien	Emaciatum	NJT 5b	182.733	6.73493e+08	29.375	5.34164e+10	PEN08-Do2003	104.35	L. Reggiani, E. Mattioli, B. Pittet, L. V. Duarte, L. C. Veiga de Oliveira, M. J. Comas-Rengifo, Pliensbachian (Early Jurassic) calcareous nannofossils from the Peniche section (Lusitanian Basin, Portugal): A clue for palaeoenvironmental reconstructions. Marine Micropaleontol. 75, 1-16 (2010).
Portugal	Peniche	Late Pliensbachien	Emaciatum	NJT 5b	182.737	5.43565e+07	29.375	4.31115e+09	PEN07-Do2003	104.25
Portugal	Peniche	Late Pliensbachien	Emaciatum	NJT 5b	182.748	4.17001e+08	29.375	3.30734e+10	PEN06-Do2003	103.9
Portugal	Peniche	Late Pliensbachien	Emaciatum	NJT 5b	182.752	4.38408e+08	29.375	3.47712e+10	PEN05-Do2003	103.78
Portugal	Peniche	Late Pliensbachien	Emaciatum	NJT 5b	182.78	3.20993e+07	29.375	2.54588e+09	PEN03-Do2003	102.95
Portugal	Peniche	Late Pliensbachien	Emaciatum	NJT 5b	182.808	2.38116e+07	29.375	1.88856e+09	PEN01-Do2003	102.1
Portugal	Peniche	Late Pliensbachien	Emaciatum	NJT 5a	182.816	1.45268e+07	29.375	1.15215e+09	PEN50	101.85
Portugal	Peniche	Late Pliensbachien	Emaciatum	NJT 5a	182.823	1.74644e+07	29.375	1.38515e+09	PEN49	101.65
Portugal	Peniche	Late Pliensbachien	Emaciatum	NJT 5a	182.865	6.78497e+07	29.375	5.38133e+09	PEN45	100.38
Portugal	Peniche	Late Pliensbachien	Emaciatum	NJT 5a	182.892	3.3204e+07	29.375	2.63349e+09	PEN44	99.58
Portugal	Peniche	Late Pliensbachien	Emaciatum	NJT 5a	182.939	5.81653e+07	29.375	4.61324e+09	PEN41	98.15
Portugal	Peniche	Late Pliensbachien	Emaciatum	NJT 5a	182.959	1.68122e+07	29.375	1.33341e+09	BB5PEN05	97.55
Portugal	Peniche	Late Pliensbachien	Emaciatum	NJT 5a	182.983	1.36532e+08	29.375	1.08287e+10	PEN38	96.83
Portugal	Peniche	Late Pliensbachien	Emaciatum	NJT 5a	183.05	8.60933e+07	29.375	6.82827e+09	PEN34	94.83
Portugal	Peniche	Late Pliensbachien	Emaciatum	NJT 5a	183.104	7.12244e+07	29.375	5.64898e+09	DO10PEN05	93.2
Portugal	Peniche	Late Pliensbachien	Emaciatum	NJT 4b	183.374	2.40754e+08	29.375	1.90948e+10	PEN 56	85.1
Portugal	Peniche	Late Pliensbachien	Emaciatum	NJT 4b	183.463	1.24794e+08	29.375	9.8977e+09	PEN 60	82.4
Portugal	Peniche	Late Pliensbachien	Emaciatum	NJT 4b	183.47	7.3026e+07	29.375	5.79188e+09	DO5PEN05	82.2
Portugal	Peniche	Late Pliensbachien	Emaciatum	NJT 4b	183.49	1.02562e+08	29.375	8.13443e+09	DO6PEN05	81.6
Portugal	Peniche	Late Pliensbachien	Margaritatus	NJT 4b	183.705	8.83515e+07	6.30303	1.50358e+09	62	80.58
Portugal	Peniche	Late Pliensbachien	Margaritatus	NJT 4b	183.777	4.78461e+07	6.30303	8.14254e+08	63	80.24
Portugal	Peniche	Late Pliensbachien	Margaritatus	NJT 4b	183.953	1.82695e+07	6.30303	3.10914e+08	65	79.41
Portugal	Peniche	Late Pliensbachien	Margaritatus	NJT 4b	184.147	4.32263e+07	6.30303	7.35633e+08	66	78.49
Portugal	Peniche	Late Pliensbachien	Margaritatus	NJT 4b	184.293	2.58354e+07	6.30303	4.39672e+08	67	77.8
Portugal	Peniche	Late Pliensbachien	Margaritatus	NJT 4b	184.409	4.50089e+07	6.30303	7.6597e+08	68	77.25
Portugal	Peniche	Late Pliensbachien	Margaritatus	NJT 4b	184.656	2.92977e+07	6.30303	4.98593e+08	70	76.08
Portugal	Peniche	Late Pliensbachien	Margaritatus	NJT 4b	184.973	1.75532e+07	6.30303	2.98723e+08	71,2	74.58
Portugal	Peniche	Late Pliensbachien	Margaritatus	NJT 4b	185.095	3.97872e+07	6.30303	6.77105e+08	72	74
Portugal	Peniche	Late Pliensbachien	Margaritatus	NJT 4b	185.273	2.22565e+08	6.30303	3.78766e+09	110	73.16
Portugal	Peniche	Late Pliensbachien	Margaritatus	NJT 4b	185.56	1.37144e+08	6.30303	2.33395e+09	106	71.8
Portugal	Peniche	Late Pliensbachien	Margaritatus	NJT 4b	185.659	3.21976e+07	6.30303	5.47945e+08	103	71.33
Portugal	Peniche	Late Pliensbachien	Margaritatus	NJT 4b	185.784	1.82836e+07	6.30303	3.11154e+08	102	70.74
Portugal	Peniche	Late Pliensbachien	Margaritatus	NJT 4b	185.906	1.70814e+07	6.30303	2.90695e+08	101	70.16
Portugal	Peniche	Late Pliensbachien	Margaritatus	NJT 4b	186.193	8.41517e+07	6.30303	1.43211e+09	99	68.8
Portugal	Peniche	Late Pliensbachien	Margaritatus	NJT 4a	186.278	2.32123e+07	6.30303	3.95031e+08	98	68.4
Portugal	Peniche	Late Pliensbachien	Margaritatus	NJT 4a	186.487	3.5431e+07	6.30303	6.02972e+08	97	67.41
Portugal	Peniche	Late Pliensbachien	Margaritatus	NJT 4a	186.616	2.33244e+07	6.30303	3.96938e+08	96	66.8
Portugal	Peniche	Late Pliensbachien	Margaritatus	NJT 4a	186.827	1.82495e+07	6.30303	3.10572e+08	95,2	65.8
Portugal	Peniche	Late Pliensbachien	Margaritatus	NJT 4a	186.926	2.79348e+07	6.30303	4.75399e+08	95	65.33
Portugal	Peniche	Late Pliensbachien	Margaritatus	NJT 4a	187.064	2.51628e+07	6.30303	4.28225e+08	94	64.68
Portugal	Peniche	Late Pliensbachien	Margaritatus	NJT 4a	187.368	1.5876e+07	6.30303	2.7018e+08	93	63.24
Portugal	Peniche	Late Pliensbachien	Margaritatus	NJT 4a	187.56	1.58676e+07	6.30303	2.70037e+08	89	62.33
Portugal	Peniche	Early Pliensbachien	Davoei	NJT 4a	187.771	3.88319e+07	6.3	6.6053e+08	84	61.33
Portugal	Peniche	Early Pliensbachien	Davoei	NJT 4a	187.824	6.35662e+07	6.3	1.08126e+09	83	61.08
Portugal	Peniche	Early Pliensbachien	Davoei	NJT 4a	187.949	1.96999e+07	6.3	3.35096e+08	81	60.49
Portugal	Peniche	Early Pliensbachien	Davoei	NJT 4a	188.071	3.55238e+07	6.3	6.04259e+08	80	59.91
Portugal	Peniche	Early Pliensbachien	Davoei	NJT 4a	188.141	1.41589e+07	6.3	2.40843e+08	78	59.58
Portugal	Peniche	Early Pliensbachien	Davoei	NJT 4a	188.318	6.6454e+07	6.3	1.13038e+09	76	58.74
Portugal	Peniche	Early Pliensbachien	Davoei	NJT 4a	188.388	1.44262e+07	6.3	2.4539e+08	75	58.41
Portugal	Peniche	Early Pliensbachien	Davoei	NJT 4a	188.51	2.62537e+07	6.3	4.46575e+08	74	57.83

## Sheet: LPlienbach.–EToarcian Cerruda
Country	Site	Stage, sub-stage	Ammonite zone	Nannofossil zone	Productivity map data	Age (Ma)	Nannofossil Absolute Abundance (nanno/g)	Sedimentation rate (m/Myr)	Nannofossil AR (nanno/m²/yr)	Sample	Height (m)	References
Spain	La Cerradura	Early Toarcian	–	–	y	179.078	9.84667e+07	3.64486	9.69023e+08	1	38.5	M. Reolid, E. Mattioli, L. M. Nieto, F. J. Rodriguez-Tovar, The Early Toarcian Oceanic Anoxic Event in the External Subbetic (Southiberian Palaeomargin, Westernmost Tethys): Geochemistry, nannofossils and ichnology. Palaeogeogr. Palaeoclimatol. Palaeoecol. 411, 79-94 (2014).
Spain	La Cerradura	Early Toarcian	–	–	y	179.271	3.0364e+08	3.64486	2.98815e+09	2	37.8	F. M. Gradstein, J. G. Ogg, M. D. Schmitz, G. M. Ogg, The Geologic Time Scale 2012. (Elsevier, Amsterdam, 2012).
Spain	La Cerradura	Early Toarcian	–	–	y	179.408	2.92171e+08	3.64486	2.87529e+09	4	37.3
Spain	La Cerradura	Early Toarcian	–	–	y	179.6	2.94124e+08	3.64486	2.89451e+09	6	36.6
Spain	La Cerradura	Early Toarcian	–	–	y	179.655	4.41851e+08	3.64486	4.34831e+09	7	36.4
Spain	La Cerradura	Early Toarcian	–	–	y	179.806	5.16368e+08	3.64486	5.08164e+09	10	35.85
Spain	La Cerradura	Early Toarcian	–	–	y	180.025	4.78359e+08	3.64486	4.70759e+09	12	35.05
Spain	La Cerradura	Early Toarcian	–	–	y	180.094	4.19536e+08	3.64486	4.1287e+09	13	34.8
Spain	La Cerradura	Early Toarcian	–	NJT 6	y	180.299	3.65654e+08	3.64486	3.59844e+09	15	34.05
Spain	La Cerradura	Early Toarcian	–	NJT 6	y	180.354	3.1466e+08	3.64486	3.09661e+09	16	33.85
Spain	La Cerradura	Early Toarcian	–	NJT 6	y	180.464	1.97307e+08	3.64486	1.94172e+09	17	33.45
Spain	La Cerradura	Early Toarcian	–	NJT 6	y	180.615	4.27946e+08	3.64486	4.21147e+09	19	32.9
Spain	La Cerradura	Early Toarcian	–	NJT 6	y	180.807	3.00506e+08	3.64486	2.95731e+09	21	32.2
Spain	La Cerradura	Early Toarcian	–	NJT 6	y	180.999	2.93427e+08	3.64486	2.88765e+09	23	31.5
Spain	La Cerradura	Early Toarcian	–	NJT 6	y	181.314	5.70423e+08	3.64486	5.6136e+09	26	30.35
Spain	La Cerradura	Early Toarcian	–	NJT 6		181.63	2.94689e+08	3.64486	2.90007e+09	28	29.2
Spain	La Cerradura	Early Toarcian	–	NJT 5B		182.014	3.11101e+08	3.64486	3.06158e+09	30	27.8
Spain	La Cerradura	Early Toarcian	–	NJT 5B		182.247	2.62774e+08	3.64486	2.58599e+09	32	26.95
Spain	La Cerradura	Early Toarcian	–	NJT 5B		182.343	4.87367e+08	3.64486	4.79624e+09	33	26.6
Spain	La Cerradura	Early Toarcian	–	NJT 5B		182.494	2.42601e+08	3.64486	2.38747e+09	34	26.05
Spain	La Cerradura	Early Toarcian	–	NJT 5B		182.59	4.93736e+08	3.64486	4.85891e+09	35	25.7
Spain	La Cerradura	Early Toarcian	–	NJT 5B		182.7	2.33023e+08	3.64486	2.2932e+09	36	25.3
Spain	La Cerradura	Late Pliensbachien	–	NJT 5B		182.752	2.63961e+08	7.70677	5.49257e+09	38	24.9
Spain	La Cerradura	Late Pliensbachien	–	NJT 5B		182.817	3.94845e+08	7.70677	8.21605e+09	39	24.4
Spain	La Cerradura	Late Pliensbachien	–	NJT 5B		182.888	2.26628e+08	7.70677	4.71573e+09	40	23.85
Spain	La Cerradura	Late Pliensbachien	–	NJT 5B		182.998	1.75972e+08	7.70677	3.66168e+09	42	23
Spain	La Cerradura	Late Pliensbachien	–	NJT 5B		183.089	2.14482e+08	7.70677	4.463e+09	44	22.3
Spain	La Cerradura	Late Pliensbachien	–	NJT 5B		183.128	2.50276e+08	7.70677	5.20781e+09	45	22
Spain	La Cerradura	Late Pliensbachien	–	NJT 5B		183.154	1.77947e+08	7.70677	3.70276e+09	46	21.8
Spain	La Cerradura	Late Pliensbachien	–	NJT 5B		183.323	2.1305e+08	7.70677	4.43321e+09	48	20.5
Spain	La Cerradura	Late Pliensbachien	–	NJT 5B		183.388	3.52145e+08	7.70677	7.32752e+09	49	20
Spain	La Cerradura	Late Pliensbachien	–	NJT 5B		183.543	3.05564e+08	7.70677	6.35827e+09	52	18.8
Spain	La Cerradura	Late Pliensbachien	–	NJT 5B		183.738	2.8536e+08	7.70677	5.93784e+09	56	17.3
Spain	La Cerradura	Late Pliensbachien	–	NJT 5B		183.835	2.77058e+08	7.70677	5.76511e+09	58	16.55
Spain	La Cerradura	Late Pliensbachien	–	NJT 5B		183.946	2.52658e+08	7.70677	5.25738e+09	60	15.7
Spain	La Cerradura	Late Pliensbachien	–	NJT 5B		184.03	2.53815e+08	7.70677	5.28146e+09	62	15.05
Spain	La Cerradura	Late Pliensbachien	–	NJT 5A		184.088	2.05472e+08	7.70677	4.27552e+09	64	14.6
Spain	La Cerradura	Late Pliensbachien	–	NJT 5A		184.465	2.14799e+08	7.70677	4.46959e+09	70	11.7
Spain	La Cerradura	Late Pliensbachien	–	NJT 5A		184.698	2.3827e+08	7.70677	4.95799e+09	74	9.9
Spain	La Cerradura	Late Pliensbachien	–	NJT 5A		184.809	2.32259e+08	7.70677	4.83291e+09	76	9.05

## Sheet: EToarcian Peniche
Country	Site	Stage, sub-stage	Ammonite zone	Nannofossil zone	Productivity map data	Age (Ma)	Nannofossil Absolute Abundance (nanno/g)	Sedimentation rate (m/Myr)	Nannofossil AR (nanno/m²/yr)	Sample	Height (m)	References
Portugal	Peniche	Early Toarcian	Levisoni	–	y	180.425	1.24238e+07	24	8.05061e+08	PEN93-To2003	39.82	E. Mattioli, B. Pittet, L. Petitpierre, S. Mailliot, Dramatic decrease of pelagic carbonate production by nannoplankton across the Early Toarcian anoxic event (T-OAE). Global Planet. Change 65, 134-145 (2009).
Portugal	Peniche	Early Toarcian	Levisoni	–	y	180.43	1.88847e+06	24	1.22373e+08	PEN92-To2003	39.7	G. Suan, B. Pittet, I. Bour, E. Mattioli, L. V. Duarte, S. Mailliot, Duration of the Early Toarcian carbon isotope excursion deduced from spectral analysis: Consequence for its possible causes. Earth Planet. Sc. Lett. 267, 666-679 (2008).
Portugal	Peniche	Early Toarcian	Levisoni	–	y	180.595	1.5927e+07	24	1.03207e+09	PEN87-To2003	36.25
Portugal	Peniche	Early Toarcian	Levisoni	–	y	180.639	2.01258e+07	24	1.30415e+09	PEN86-To2003	35.34
Portugal	Peniche	Early Toarcian	Levisoni	–	y	180.833	1.82156e+08	24	1.18037e+10	PEN TO5.2-402	31.277
Portugal	Peniche	Early Toarcian	Levisoni	–	y	180.851	7.86679e+07	24	5.09768e+09	PEN78-To2003	30.9
Portugal	Peniche	Early Toarcian	Levisoni	–	y	181.033	5.72739e+07	24	3.71135e+09	PEN72-To2003	27.1
Portugal	Peniche	Early Toarcian	Levisoni	–	y	181.14	2.31033e+07	24	1.4971e+09	PEN68-To2003	24.88
Portugal	Peniche	Early Toarcian	Levisoni	–	y	181.221	3.93869e+07	24	2.55227e+09	PEN65-To2003	23.18
Portugal	Peniche	Early Toarcian	Levisoni	–	y	181.288	8.19347e+07	21	4.6457e+09	PEN61bis-To2003	21.78
Portugal	Peniche	Early Toarcian	Levisoni	–		181.319	7.79455e+06	21	4.41951e+08	PEN61-To2003	21.13
Portugal	Peniche	Early Toarcian	Levisoni	–		181.362	3.18606e+06	21	1.80649e+08	PEN TO4.1-502	20.238
Portugal	Peniche	Early Toarcian	Levisoni	–		181.364	1.64527e+07	21	9.3287e+08	PEN58bis-To2003	20.19
Portugal	Peniche	Early Toarcian	Levisoni	–		181.432	6.20828e+06	21	3.52009e+08	PEN56-To2003	18.76
Portugal	Peniche	Early Toarcian	Levisoni	–		181.498	5.58036e+06	21	316406250	PEN52-To2003	17.39
Portugal	Peniche	Early Toarcian	Levisoni	–		181.517	9.3945e+07	14.2	3.60185e+09	PEN50bis-To2003	16.99
Portugal	Peniche	Early Toarcian	Levisoni	–		181.621	1.35367e+07	14.2	5.18997e+08	PEN TO3.2-168	14.827
Portugal	Peniche	Early Toarcian	Levisoni	–		181.663	1.59776e+07	14.2	6.12581e+08	PEN45bis-To2003	13.94
Portugal	Peniche	Early Toarcian	Levisoni	–		181.695	8.12683e+07	14.2	3.11583e+09	PEN TO3.1-138	13.278
Portugal	Peniche	Early Toarcian	Levisoni	–		181.7	5.42826e+06	14.2	2.0812e+08	PEN44-To2003	13.17
Portugal	Peniche	Early Toarcian	Polymorphum	–		181.732	3.44915e+07	14.2	1.3224e+09	PEN43-To2003	12.82
Portugal	Peniche	Early Toarcian	Polymorphum	–		181.809	2.0758e+08	14.2	7.95863e+09	PEN40-To2003	11.98
Portugal	Peniche	Early Toarcian	Polymorphum	–		181.876	2.51236e+08	14.2	9.63238e+09	PEN37-To2003	11.25
Portugal	Peniche	Early Toarcian	Polymorphum	–		181.941	4.539e+08	14.2	1.74025e+10	PEN35-To2003	10.54
Portugal	Peniche	Early Toarcian	Polymorphum	–		181.986	3.52719e+08	14.2	1.35233e+10	PEN33-To2003	10.05
Portugal	Peniche	Early Toarcian	Polymorphum	–		182.036	3.90625e+08	14.2	1.49766e+10	PEN30-To2003	9.5
Portugal	Peniche	Early Toarcian	Polymorphum	–		182.156	5.32097e+08	14.2	2.04006e+10	PEN27-To2003	8.2
Portugal	Peniche	Early Toarcian	Polymorphum	–		182.197	7.52586e+08	14.2	2.88541e+10	PEN25bis-To2003	7.75
Portugal	Peniche	Early Toarcian	Polymorphum	–		182.247	5.47305e+07	14.2	2.09837e+09	PEN24-To2003	7.2
Portugal	Peniche	Early Toarcian	Polymorphum	–		182.28	4.01059e+07	14.2	1.53766e+09	PEN23bis-To2003	6.84
Portugal	Peniche	Early Toarcian	Polymorphum	–		182.366	5.39212e+08	14.2	2.06734e+10	PEN21-To2003	5.9
Portugal	Peniche	Early Toarcian	Polymorphum	–		182.487	3.14592e+08	14.2	1.20615e+10	PEN17-To2003	4.58
Portugal	Peniche	Early Toarcian	Polymorphum	–		182.594	5.60935e+07	17	2.57469e+09	PEN13bis-To2003	3.42
Portugal	Peniche	Early Toarcian	Polymorphum	–		182.636	1.08494e+09	17	4.97988e+10	PEN13-To2003	2.96
Portugal	Peniche	Early Toarcian	Polymorphum	–		182.654	5.58803e+08	17	2.5649e+10	PEN TO1.1-9	2.76179
Portugal	Peniche	Early Toarcian	Polymorphum	–		182.7	1.46587e+07	17	6.72832e+08	PEN09-To2003	2.26

## Sheet: LPliens.–EToarcian Tournedous
Country	Site	Stage, sub-stage	Ammonite zone	Nannofossil zone	Productivity map data	Age (Ma)	Nannofossil Absolute Abundance (nanno/g)	Sedimentation rate (m/Myr)	Nannofossil AR (nanno/m²/yr)	Sample	Height (m)	References
France	Tournedous	Early Toarcian	Serpentinum	–	y	181.252	1.78974e+07	5.33	2.57561e+08	TND51*	5.01	S. Mailliot, E. Mattioli, A. Bartolini, F. Baudin, B. Pittet, J. Guex, Late Pliensbachian-Early Toarcian (Early Jurassic) environmental changes in an epicontinental basin of NW Europe (Causses area, central France): A micropaleontological and geochemical approach. Palaeogeogr. Palaeoclimatol. Palaeoecol. 273, 346-364 (2009).
France	Tournedous	Early Toarcian	Serpentinum	–	y	181.272	3.1113e+07	5.33	4.47747e+08	TND50	4.9	G. Suan, B. Pittet, I. Bour, E. Mattioli, L. V. Duarte, S. Mailliot, Duration of the Early Toarcian carbon isotope excursion deduced from spectral analysis: Consequence for its possible causes. Earth Planet. Sc. Lett. 267, 666-679 (2008).
France	Tournedous	Early Toarcian	Serpentinum	–	y	181.31	1.73838e+07	5.33	2.5017e+08	TND48*	4.7
France	Tournedous	Early Toarcian	Serpentinum	–	y	181.351	1.7604e+07	5.33	2.53339e+08	TND46	4.48
France	Tournedous	Early Toarcian	Serpentinum	–	y	181.375	5.41422e+07	5.33	7.7916e+08	TND44*	4.35
France	Tournedous	Early Toarcian	Serpentinum	–	y	181.389	1.85145e+07	5.33	2.66443e+08	TND43	4.28
France	Tournedous	Early Toarcian	Serpentinum	–	y	181.432	2.33191e+07	5.33	3.35585e+08	TND41*	4.05
France	Tournedous	Early Toarcian	Serpentinum	–	y	181.475	1.40832e+07	5.33	2.02671e+08	TND39	3.82
France	Tournedous	Early Toarcian	Serpentinum	–	y	181.516	1.78974e+07	5.33	2.57561e+08	TND37*	3.6
France	Tournedous	Early Toarcian	Serpentinum	–	y	181.559	563365	5.33	8.10738e+06	TND35	3.37
France	Tournedous	Early Toarcian	Serpentinum	–	y	181.601	2.0538e+07	5.33	2.95562e+08	TND33*	3.15
France	Tournedous	Early Toarcian	Serpentinum	–	y	181.638	3.76247e+07	5.33	5.41457e+08	TND31	2.95
France	Tournedous	Early Toarcian	Serpentinum	–	y	181.664	138071	5.33	1.98697e+06	TND30	2.81
France	Tournedous	Early Toarcian	Serpentinum	–		181.689	1.76619e+07	5.33	2.54172e+08	TND28	2.68
France	Tournedous	Early Toarcian	Serpentinum	–		181.7	2.45731e+06	5.33	3.53631e+07	TND27	2.62
France	Tournedous	Late Pliensbachian	Spinatum	–		182.7	833891	1.84	4.14277e+06	TND26	2.55
France	Tournedous	Late Pliensbachian	Spinatum	–		182.754	1.42231e+08	1.84	7.06603e+08	TND25*	2.44
France	Tournedous	Late Pliensbachian	Spinatum	–		182.896	1.69009e+06	1.84	8.39639e+06	TND23	2.2
France	Tournedous	Late Pliensbachian	Spinatum	–		183.021	5.81084e+06	1.84	2.88683e+07	TND21*	1.98
France	Tournedous	Late Pliensbachian	Spinatum	–		183.129	1.5062e+06	1.84	7.48279e+06	TND19	1.75
France	Tournedous	Late Pliensbachian	Spinatum	–		183.189	2.66706e+06	1.84	1.325e+07	TND18	1.65
France	Tournedous	Late Pliensbachian	Spinatum	–		183.254	1.67788e+07	1.84	8.33571e+07	TND17*	1.54
France	Tournedous	Late Pliensbachian	Spinatum	–		183.347	2.10454e+06	1.84	1.04554e+07	TND15	1.33
France	Tournedous	Late Pliensbachian	Spinatum	–		183.455	5.43243e+06	1.84	2.69883e+07	TND13*	1.15
France	Tournedous	Late Pliensbachian	Spinatum	–		183.564	225877	1.84	1.12216e+06	TND11	0.95
France	Tournedous	Late Pliensbachian	Spinatum	–		183.667	1.26553e+06	1.84	6.28715e+06	TND09*	0.75
France	Tournedous	Late Pliensbachian	Spinatum	–		183.771	7.78148e+06	1.84	3.86584e+07	TND07	0.57
France	Tournedous	Late Pliensbachian	Spinatum	–		183.868	1.56082e+07	1.84	7.75415e+07	TND05*	0.38
France	Tournedous	Late Pliensbachian	Spinatum	–		183.966	2.0368e+06	1.84	1.01188e+07	TND03	0.2
France	Tournedous	Late Pliensbachian	Spinatum	–		184.026	6.04454e+06	1.84	3.00293e+07	TND01a*	0.03

## Sheet: LPliens.–EToarcian StPaulFonts
Country	Site	Stage, sub-stage	Ammonite zone	Nannofossil zone	Productivity map data	Age (Ma)	Nannofossil Absolute Abundance (nanno/g)	Sedimentation rate (m/Myr)	Nannofossil AR (nanno/m²/yr)	Sample	Height (m)	References
France	Saint-Paul-des-Fonts	Early Toarcian	Serpentinum	–	y	181.147	7.39272e+08	8.3	1.66336e+10	SPF69*	7.25	S. Mailliot, E. Mattioli, A. Bartolini, F. Baudin, B. Pittet, J. Guex, Late Pliensbachian-Early Toarcian (Early Jurassic) environmental changes in an epicontinental basin of NW Europe (Causses area, central France): A micropaleontological and geochemical approach. Palaeogeogr. Palaeoclimatol. Palaeoecol. 273, 346-364 (2009).
France	Saint-Paul-des-Fonts	Early Toarcian	Serpentinum	–	y	181.171	2.00984e+09	8.3	4.52213e+10	SPF67	7.05	G. Suan, B. Pittet, I. Bour, E. Mattioli, L. V. Duarte, S. Mailliot, Duration of the Early Toarcian carbon isotope excursion deduced from spectral analysis: Consequence for its possible causes. Earth Planet. Sc. Lett. 267, 666-679 (2008).
France	Saint-Paul-des-Fonts	Early Toarcian	Serpentinum	–	y	181.195	3.07339e+08	8.3	6.91513e+09	SPF65*	6.85
France	Saint-Paul-des-Fonts	Early Toarcian	Serpentinum	–	y	181.231	6.98211e+08	8.3	1.57097e+10	SPF63	6.55
France	Saint-Paul-des-Fonts	Early Toarcian	Serpentinum	–	y	181.265	5.41582e+08	8.3	1.21856e+10	SPF61*	6.27
France	Saint-Paul-des-Fonts	Early Toarcian	Serpentinum	–	y	181.304	5.93329e+08	8.3	1.33499e+10	SPF59	5.95
France	Saint-Paul-des-Fonts	Early Toarcian	Serpentinum	–	y	181.328	4.00688e+08	8.3	9.01548e+09	SPF57a*	5.75
France	Saint-Paul-des-Fonts	Early Toarcian	Serpentinum	–	y	181.352	4.64901e+08	8.3	1.04603e+10	SPF55a	5.55
France	Saint-Paul-des-Fonts	Early Toarcian	Serpentinum	–	y	181.376	5.23159e+08	8.3	1.17711e+10	SPF53b*	5.35
France	Saint-Paul-des-Fonts	Early Toarcian	Serpentinum	–	y	181.4	2.7219e+08	8.3	6.12426e+09	SPF51b	5.15
France	Saint-Paul-des-Fonts	Early Toarcian	Serpentinum	–	y	181.424	3.13293e+08	8.3	7.0491e+09	SPF49*	4.95
France	Saint-Paul-des-Fonts	Early Toarcian	Serpentinum	–	y	181.458	1.71072e+08	8.3	3.84912e+09	SPF47	4.67
France	Saint-Paul-des-Fonts	Early Toarcian	Serpentinum	–	y	181.478	6.73574e+07	8.3	1.51554e+09	SPF45*	4.5
France	Saint-Paul-des-Fonts	Early Toarcian	Serpentinum	–	y	181.49	1.00528e+08	8.3	2.26188e+09	SPF44	4.4
France	Saint-Paul-des-Fonts	Early Toarcian	Serpentinum	–	y	181.508	2.49224e+08	8.3	5.60753e+09	SPF42	4.25
France	Saint-Paul-des-Fonts	Early Toarcian	Serpentinum	–	y	181.533	2.1208e+08	8.3	4.7718e+09	SPF40b*	4.05
France	Saint-Paul-des-Fonts	Early Toarcian	Serpentinum	–		181.563	377630	8.3	8.49669e+06	SPF38	3.8
France	Saint-Paul-des-Fonts	Early Toarcian	Serpentinum	–		181.593	5.96203e+07	8.3	1.34146e+09	SPF36*	3.55
France	Saint-Paul-des-Fonts	Early Toarcian	Serpentinum	–		181.617	1.87288e+07	8.3	4.21399e+08	SPF34	3.35
France	Saint-Paul-des-Fonts	Early Toarcian	Serpentinum	–		181.641	701184	8.3	1.57766e+07	SPF32*	3.15
France	Saint-Paul-des-Fonts	Early Toarcian	Serpentinum	–		181.665	4.76779e+06	8.3	1.07275e+08	SPF30	2.95
France	Saint-Paul-des-Fonts	Early Toarcian	Serpentinum	–		181.677	2.25036e+06	8.3	5.06331e+07	SPF29	2.85
France	Saint-Paul-des-Fonts	Early Toarcian	Serpentinum	–		181.689	1.45765e+07	8.3	3.27972e+08	SPF28*	2.75
France	Saint-Paul-des-Fonts	Early Toarcian	Serpentinum	–		181.7	862615	8.3	1.94088e+07	SPF27b	2.66
France	Saint-Paul-des-Fonts	Late Pliensbachian	Spinatum	–		182.708	4.62103e+08	8.3	1.03973e+10	SPF25*	2.57
France	Saint-Paul-des-Fonts	Late Pliensbachian	Spinatum	–		182.741	5.69651e+08	8.3	1.28171e+10	SPF23	2.3
France	Saint-Paul-des-Fonts	Late Pliensbachian	Spinatum	–		182.765	3.60956e+08	8.3	8.12151e+09	SPF21*	2.1
France	Saint-Paul-des-Fonts	Late Pliensbachian	Spinatum	–		182.789	2.96003e+08	8.3	6.66006e+09	SPF19	1.9
France	Saint-Paul-des-Fonts	Late Pliensbachian	Spinatum	–		182.813	3.86502e+08	8.3	8.6963e+09	SPF17*	1.7
France	Saint-Paul-des-Fonts	Late Pliensbachian	Spinatum	–		182.837	3.00744e+08	8.3	6.76673e+09	SPF15b	1.5
France	Saint-Paul-des-Fonts	Late Pliensbachian	Spinatum	–		182.861	3.40224e+08	8.3	7.65504e+09	SPF13*	1.3
France	Saint-Paul-des-Fonts	Late Pliensbachian	Spinatum	–		182.886	5.08449e+08	8.3	1.14401e+10	SPF11	1.1
France	Saint-Paul-des-Fonts	Late Pliensbachian	Spinatum	–		182.91	3.85913e+08	8.3	8.68303e+09	SPF09*	0.9
France	Saint-Paul-des-Fonts	Late Pliensbachian	Spinatum	–		182.934	6.44643e+08	8.3	1.45045e+10	SPF07a	0.7
France	Saint-Paul-des-Fonts	Late Pliensbachian	Spinatum	–		182.958	5.76171e+08	8.3	1.29638e+10	SPF05*	0.5
France	Saint-Paul-des-Fonts	Late Pliensbachian	Spinatum	–		182.982	4.59209e+08	8.3	1.03322e+10	SPF03a	0.3
France	Saint-Paul-des-Fonts	Late Pliensbachian	Spinatum	–		183	6.05634e+06	8.3	1.36268e+08	SPF02a	0.15
France	Saint-Paul-des-Fonts	Late Pliensbachian	Spinatum	–		183.012	3.04137e+08	8.3	6.84308e+09	SPF01b*	0.05

## Sheet: LPliens.–EToarcian Somma
Country	Site	Stage, sub-stage	Ammonite zone	Nannofossil zone	Productivity map data	Age (Ma)	Nannofossil Absolute Abundance (nanno/g)	Sedimentation rate (m/Myr)	Nannofossil AR (nanno/m²/yr)	Sample	Height (m)	References
Italy	Somma	Early Toarcian	–	–	y	180.883	9.02112e+07	1.69	4.11634e+08	MBE 2.90	2.9	E. Mattioli, B. Pittet, L. Petitpierre, S. Mailliot, Dramatic decrease of pelagic carbonate production by nannoplankton across the Early Toarcian anoxic event (T-OAE). Global Planet. Change 65, 134-145 (2009).
Italy	Somma	Early Toarcian	–	–	y	180.913	2.15948e+08	1.69	9.8537e+08	MBE 2.85	2.85	F. M. Gradstein, J. G. Ogg, M. D. Schmitz, G. M. Ogg, The Geologic Time Scale 2012. (Elsevier, Amsterdam, 2012).
Italy	Somma	Early Toarcian	–	–	y	181.002	2.33064e+08	1.69	1.06347e+09	MBE 2.70	2.7
Italy	Somma	Early Toarcian	–	–	y	181.061	1.93844e+08	1.69	8.84512e+08	MBE 2.60	2.6
Italy	Somma	Early Toarcian	–	–	y	181.091	1.55107e+07	1.69	7.07754e+07	MBE 2.55	2.55
Italy	Somma	Early Toarcian	–	–	y	181.179	5.94827e+07	1.69	2.7142e+08	MBE 2.40	2.4
Italy	Somma	Early Toarcian	–	–	y	181.209	4.13614e+07	1.69	1.88732e+08	MBE 2.35	2.35
Italy	Somma	Early Toarcian	–	–	y	181.238	2.85698e+08	1.69	1.30364e+09	MBE 2.30	2.3
Italy	Somma	Early Toarcian	–	–	y	181.298	5.94279e+07	1.69	2.7117e+08	MBE 2.20	2.2
Italy	Somma	Early Toarcian	–	–	y	181.386	1.1587e+08	1.69	5.28715e+08	MBE 2.05	2.05
Italy	Somma	Early Toarcian	–	–		181.416	4.58727e+07	1.69	2.09317e+08	MBE 2.00	2
Italy	Somma	Early Toarcian	–	–		181.446	4.99912e+07	1.69	2.2811e+08	MBE 1.95	1.95
Italy	Somma	Early Toarcian	–	–		181.505	8.24696e+07	1.69	3.76309e+08	MBE 1.85	1.85
Italy	Somma	Early Toarcian	–	–		181.546	1.03056e+08	1.69	4.70247e+08	MBE 1.78	1.78
Italy	Somma	Early Toarcian	–	–		181.564	1.55088e+08	1.69	7.07666e+08	MBE 1.75	1.75
Italy	Somma	Early Toarcian	–	–		181.588	1.43002e+07	1.69	6.52518e+07	MBE 1.71	1.71
Italy	Somma	Early Toarcian	–	–		181.653	3.0539e+07	1.69	1.39349e+08	MBE 1.60	1.6
Italy	Somma	Early Toarcian	–	–		181.7	2.44767e+07	1.69	1.11687e+08	MBE 1.52	1.52
Italy	Somma	Late Pliensbachian	–	–		182.7	2.78826e+07	1.69	1.27228e+08	MBE 1.35	1.35
Italy	Somma	Late Pliensbachian	–	–		182.818	2.35869e+07	1.69	1.07627e+08	MBE 1.15	1.15
Italy	Somma	Late Pliensbachian	–	–		182.996	5.13138e+07	1.69	2.34145e+08	MBE 0.85	0.85
Italy	Somma	Late Pliensbachian	–	–		183.114	6.14309e+07	1.69	2.80309e+08	MBE 0.65	0.65
Italy	Somma	Late Pliensbachian	–	–		183.173	2.53249e+07	1.69	1.15558e+08	MBE 0.55	0.55
Italy	Somma	Late Pliensbachian	–	–		183.262	1.29268e+07	1.69	5.89851e+07	MBE 0.40	0.4
Italy	Somma	Late Pliensbachian	–	–		183.351	1.8664e+07	1.69	8.51637e+07	MBE 0.25	0.25
Italy	Somma	Late Pliensbachian	–	–		183.38	2.87026e+07	1.69	1.3097e+08	MBE 0.20	0.2
Italy	Somma	Late Pliensbachian	–	–		183.44	7.08125e+07	1.69	3.23117e+08	MBE 0.10	0.1

## Sheet: EToarcian Dotterhausen
Country	Site	Stage, sub-stage	Ammonite zone	Nannofossil zone	Productivity map data	Age (Ma)	Nannofossil Absolute Abundance (nanno/g)	Sedimentation rate (m/Myr)	Nannofossil AR (nanno/m²/yr)	Sample	Height (m)	References
Germany	Dotterhausen	Early Toarcian	Bifrons	–	y	179.71	5.33985e+07	4.16667	6.00733e+08	–	1.338	E. Mattioli, B. Pittet, L. Petitpierre, S. Mailliot, Dramatic decrease of pelagic carbonate production by nannoplankton across the Early Toarcian anoxic event (T-OAE). Global Planet. Change 65, 134-145 (2009).
Germany	Dotterhausen	Early Toarcian	Bifrons	–	y	179.728	1.45977e+08	4.16667	1.64225e+09	–	1.415	E. Mattioli, B. Pittet, L. Petitpierre, S. Mailliot, Dramatic decrease of pelagic carbonate production by nannoplankton across the Early Toarcian anoxic event (T-OAE). Global Planet. Change 65, 134-145 (2009).
Germany	Dotterhausen	Early Toarcian	Bifrons	–	y	179.757	1.74124e+08	4.16667	1.9589e+09	–	1.533
Germany	Dotterhausen	Early Toarcian	Bifrons	–	y	179.797	1.63444e+08	4.16667	1.83874e+09	–	1.695
Germany	Dotterhausen	Early Toarcian	Bifrons	–	y	179.834	3.06259e+08	4.16667	3.44542e+09	–	1.845
Germany	Dotterhausen	Early Toarcian	Bifrons	–	y	179.857	1.69135e+08	4.16667	1.90277e+09	–	1.94
Germany	Dotterhausen	Early Toarcian	Bifrons	–	y	179.876	7.07084e+07	4.16667	7.95469e+08	–	2.02
Germany	Dotterhausen	Early Toarcian	Bifrons	–	y	179.901	1.12802e+08	4.16667	1.26902e+09	–	2.12
Germany	Dotterhausen	Early Toarcian	Bifrons	–	y	179.946	1.63539e+08	4.16667	1.83981e+09	–	2.305
Germany	Dotterhausen	Early Toarcian	Bifrons	–	y	179.994	1.78843e+08	4.16667	2.01198e+09	–	2.5
Germany	Dotterhausen	Early Toarcian	Bifrons	–	y	180.036	2.03738e+08	4.16667	2.29205e+09	–	2.675
Germany	Dotterhausen	Early Toarcian	Bifrons	–	y	180.077	1.79418e+08	4.16667	2.01846e+09	–	2.84
Germany	Dotterhausen	Early Toarcian	Bifrons	–	y	180.134	1.89156e+08	4.16667	2.128e+09	–	3.075
Germany	Dotterhausen	Early Toarcian	Bifrons	–	y	180.183	8.28246e+07	4.16667	9.31777e+08	–	3.275
Germany	Dotterhausen	Early Toarcian	Bifrons	–	y	180.241	1.88876e+08	4.16667	2.12485e+09	–	3.513
Germany	Dotterhausen	Early Toarcian	Bifrons	–	y	180.307	2.89969e+08	4.16667	3.26215e+09	–	3.783
Germany	Dotterhausen	Early Toarcian	Bifrons	–	y	180.334	2.12037e+08	4.16667	2.38541e+09	–	3.893
Germany	Dotterhausen	Early Toarcian	Bifrons	–	y	180.358	1.90886e+08	4.16667	2.14747e+09	–	3.99
Germany	Dotterhausen	Early Toarcian	Falciferum	–	y	180.394	1.59569e+08	4.16667	1.79515e+09	–	4.14
Germany	Dotterhausen	Early Toarcian	Falciferum	–	y	180.418	2.57376e+08	4.16667	2.89548e+09	–	4.238
Germany	Dotterhausen	Early Toarcian	Falciferum	–	y	180.436	1.33262e+08	4.16667	1.49919e+09	–	4.313
Germany	Dotterhausen	Early Toarcian	Falciferum	–	y	180.471	1.86095e+08	4.16667	2.09357e+09	–	4.453
Germany	Dotterhausen	Early Toarcian	Falciferum	–	y	180.522	2.08943e+08	4.16667	2.35061e+09	–	4.665
Germany	Dotterhausen	Early Toarcian	Falciferum	–	y	180.551	1.16429e+08	4.16667	1.30983e+09	–	4.782
Germany	Dotterhausen	Early Toarcian	Falciferum	–	y	180.559	1.04079e+08	4.16667	1.17088e+09	–	4.815
Germany	Dotterhausen	Early Toarcian	Falciferum	–	y	180.587	2.60596e+08	4.16667	2.93171e+09	–	4.931
Germany	Dotterhausen	Early Toarcian	Falciferum	–	y	180.609	2.63562e+08	4.16667	2.96507e+09	–	5.02
Germany	Dotterhausen	Early Toarcian	Falciferum	–	y	180.63	2.07616e+08	4.16667	2.33568e+09	–	5.105
Germany	Dotterhausen	Early Toarcian	Falciferum	–	y	180.646	2.05196e+08	4.16667	2.30846e+09	–	5.17
Germany	Dotterhausen	Early Toarcian	Falciferum	–	y	180.666	2.02221e+08	4.16667	2.27498e+09	–	5.253
Germany	Dotterhausen	Early Toarcian	Falciferum	–	y	180.677	1.9325e+08	4.16667	2.17406e+09	–	5.297
Germany	Dotterhausen	Early Toarcian	Falciferum	–	y	180.703	1.85343e+08	4.16667	2.0851e+09	–	5.405
Germany	Dotterhausen	Early Toarcian	Falciferum	–	y	180.718	5.18799e+07	4.16667	5.83649e+08	–	5.464
Germany	Dotterhausen	Early Toarcian	Falciferum	–	y	180.754	4.33133e+07	4.16667	4.87274e+08	–	5.611
Germany	Dotterhausen	Early Toarcian	Falciferum	–	y	180.794	8.27459e+07	4.16667	9.30891e+08	–	5.776
Germany	Dotterhausen	Early Toarcian	Falciferum	–	y	180.834	3.19033e+07	4.16667	3.58912e+08	–	5.94
Germany	Dotterhausen	Early Toarcian	Falciferum	–	y	180.911	5.2233e+07	4.16667	5.87621e+08	–	6.255
Germany	Dotterhausen	Early Toarcian	Falciferum	–	y	180.926	1.0015e+08	4.16667	1.12668e+09	–	6.317
Germany	Dotterhausen	Early Toarcian	Falciferum	–	y	180.941	3.5991e+07	4.16667	4.04899e+08	–	6.377
Germany	Dotterhausen	Early Toarcian	Falciferum	–	y	180.956	7.36863e+07	4.16667	8.28971e+08	–	6.441
Germany	Dotterhausen	Early Toarcian	Falciferum	–	y	180.989	2.64227e+07	4.16667	2.97256e+08	–	6.575
Germany	Dotterhausen	Early Toarcian	Falciferum	–	y	181.012	1.18687e+08	4.16667	1.33523e+09	–	6.667
Germany	Dotterhausen	Early Toarcian	Falciferum	–	y	181.058	2.49188e+07	4.16667	2.80336e+08	–	6.858
Germany	Dotterhausen	Early Toarcian	Falciferum	–	y	181.071	2.54307e+07	4.16667	2.86095e+08	–	6.91
Germany	Dotterhausen	Early Toarcian	Falciferum	–	y	181.14	1.02609e+07	4.16667	1.15435e+08	–	7.193
Germany	Dotterhausen	Early Toarcian	Falciferum	–	y	181.176	2.51124e+07	4.16667	2.82515e+08	–	7.341
Germany	Dotterhausen	Early Toarcian	Falciferum	–	y	181.204	8.67699e+07	4.16667	9.76162e+08	–	7.456
Germany	Dotterhausen	Early Toarcian	Falciferum	–	y	181.226	2.84208e+07	4.16667	3.19734e+08	–	7.543
Germany	Dotterhausen	Early Toarcian	Falciferum	–	y	181.25	2.01862e+07	4.16667	2.27094e+08	–	7.641
Germany	Dotterhausen	Early Toarcian	Falciferum	–	y	181.297	1.0369e+07	4.16667	1.16651e+08	–	7.837
Germany	Dotterhausen	Early Toarcian	Falciferum	–	y	181.314	9.66931e+06	4.16667	1.0878e+08	–	7.904
Germany	Dotterhausen	Early Toarcian	Falciferum	–		181.382	1.89102e+07	4.16667	2.1274e+08	–	8.183
Germany	Dotterhausen	Early Toarcian	Falciferum	–		181.414	6.49985e+06	4.16667	7.31233e+07	–	8.314
Germany	Dotterhausen	Early Toarcian	Falciferum	–		181.449	3.21254e+07	4.16667	3.6141e+08	–	8.458
Germany	Dotterhausen	Early Toarcian	Falciferum	–		181.463	9.08968e+07	4.16667	1.02259e+09	–	8.513
Germany	Dotterhausen	Early Toarcian	Falciferum	–		181.54	1.68892e+07	4.16667	1.90003e+08	–	8.832
Germany	Dotterhausen	Early Toarcian	Falciferum	–		181.577	8.55864e+06	4.16667	9.62847e+07	–	8.98
Germany	Dotterhausen	Early Toarcian	Falciferum	–		181.608	5.00347e+07	4.16667	5.62891e+08	–	9.11
Germany	Dotterhausen	Early Toarcian	Falciferum	–		181.662	8.36362e+06	4.16667	9.40907e+07	–	9.33
Germany	Dotterhausen	Early Toarcian	Tenuicostatum	–		181.741	2.27177e+07	4.16667	2.55574e+08	–	9.579
Germany	Dotterhausen	Early Toarcian	Tenuicostatum	–		181.819	1.35191e+07	4.16667	1.5209e+08	–	9.756
Germany	Dotterhausen	Early Toarcian	Tenuicostatum	–		181.877	3.49251e+07	4.16667	3.92907e+08	–	9.886
Germany	Dotterhausen	Early Toarcian	Tenuicostatum	–		181.917	4.94293e+07	4.16667	5.5608e+08	–	9.977
Germany	Dotterhausen	Early Toarcian	Tenuicostatum	–		181.963	3.92966e+07	4.16667	4.42087e+08	–	10.083
Germany	Dotterhausen	Early Toarcian	Tenuicostatum	–		182.015	5.30096e+07	4.16667	5.96358e+08	–	10.199
Germany	Dotterhausen	Early Toarcian	Tenuicostatum	–		182.063	9.52129e+07	4.16667	1.07115e+09	–	10.31
Germany	Dotterhausen	Early Toarcian	Tenuicostatum	–		182.112	5.73622e+07	4.16667	6.45325e+08	–	10.42
Germany	Dotterhausen	Early Toarcian	Tenuicostatum	–		182.155	4.59216e+07	4.16667	5.16618e+08	–	10.517
Germany	Dotterhausen	Early Toarcian	Tenuicostatum	–		182.2	4.29807e+07	4.16667	4.83533e+08	–	10.619
Germany	Dotterhausen	Early Toarcian	Tenuicostatum	–		182.256	7.08185e+07	4.16667	7.96708e+08	–	10.746
Germany	Dotterhausen	Early Toarcian	Tenuicostatum	–		182.305	6.16407e+07	4.16667	6.93458e+08	–	10.859
Germany	Dotterhausen	Early Toarcian	Tenuicostatum	–		182.353	6.95072e+07	4.16667	7.81956e+08	–	10.968
Germany	Dotterhausen	Early Toarcian	Tenuicostatum	–		182.396	1.21332e+07	4.16667	1.36498e+08	–	11.066
Germany	Dotterhausen	Early Toarcian	Tenuicostatum	–		182.452	1.1909e+07	4.16667	1.33977e+08	–	11.193
Germany	Dotterhausen	Early Toarcian	Tenuicostatum	–		182.468	4.99866e+07	4.16667	5.62349e+08	–	11.228
Germany	Dotterhausen	Early Toarcian	Tenuicostatum	–		182.51	4.55589e+07	4.16667	5.12537e+08	–	11.323
Germany	Dotterhausen	Early Toarcian	Tenuicostatum	–		182.554	3.81435e+07	4.16667	4.29114e+08	–	11.423
Germany	Dotterhausen	Early Toarcian	Tenuicostatum	–		182.604	3.10118e+07	4.16667	3.48883e+08	–	11.537
Germany	Dotterhausen	Early Toarcian	Tenuicostatum	–		182.653	1.98932e+07	4.16667	2.23798e+08	–	11.649
Germany	Dotterhausen	Early Toarcian	Tenuicostatum	–		182.672	1.82066e+07	4.16667	2.04824e+08	–	11.692
Germany	Dotterhausen	Early Toarcian	Tenuicostatum	–		182.7	1.1377e+07	4.16667	1.27992e+08	–	11.755

[truncated: 70 more sheets: EToarcian Yorkshire, EToarcian Réka Valley, EToarcian Chionistra, EToarcian HTM-102, EToarcian K2-5, LPliens.–LToarcian Rabaçal, LAalenian–EBajocian CaboMondego, LAalenian–EBajocian Chaudon-Nor, MCallov.–EOxford. La Voulte, MOxfordian La Voulte, MOxfordian Meussia, LOxfordian Balingen-Tieringen, LOxfordian Plettenberg, LOxford.–EKimmerid. PasAssassin, Tithonian–Berriasian DSDP105, Tithonian-Valanginian DSDP534A, Tithonian–Valanginian DSDP367, Berrias.–EHauteri. Perisph.Rav., Berrias.-EHauteriv. Rodryggen, LBerrias.-EHauteriv. Polaveno …]
