# Supplementary material for: The colonization of the oceans by calcifying pelagic algae
Source: Copernicus journal article supplement (doi:10.5194/bg-2018-493), 2018-12-11
Supplement: Supplementary file 2 [file Table_S2.xlsx]

## Sheet: AR maps data
Toarcian (-181 Ma)
Country	Site	Mean Nannofossil Absolute Abundance (nanno/g)	Mean Nannofossil AR (nanno/m²/yr)	Number of sample	Reconstructed map
Spain	La Cerradura	3.54296e+08	3.48667e+09	15	Occidental Tethys
Portugal	Peniche	5.12888e+07	3.25715e+09	10	Occidental Tethys
France	Tournedous	2.08322e+07	2.99796e+08	13	Occidental Tethys
France	Saint-Paul-des-Fonts	4.79004e+08	1.07776e+10	16	Occidental Tethys
Italy	Somma	1.31042e+08	5.97944e+08	10	Occidental Tethys
Germany	Dotterhausen	1.29742e+08	1.45959e+09	51	Occidental Tethys
England	Yorkshire	1.74324e+08	2.92449e+10	20	Occidental Tethys
Hungary	Réka Valley	9.37715e+07	2.14336e+09	18	Occidental Tethys
Greece	Chionistra	2.806e+06	7.5762e+07	23	Occidental Tethys
France	HTM-102	1.99566e+08	9.33338e+09	39	Occidental Tethys
Portugal	Rabaçal	1.2276e+08	4.14316e+09	14	Occidental Tethys
Valanginian (-135 Ma)
Country	Site	Mean Nannofossil Absolute Abundance (nanno/g)	Mean Nannofossil AR (nanno/m²/yr)	Number of sample	Reconstructed map
Greenland	Perisphinctes Ravine	9.39006e+08	1.13473e+10	56	Occidental Tethys; World
Italy	Polaveno	5.26923e+08	5.33794e+10	77	Occidental Tethys; World
North Atlantic	DSDP534A	1.39722e+09	8.37711e+10	36	World
North Atlantic	DSDP603B	4.72319e+09	2.66499e+11	69	World
France	Vergol-La Charce	9.24155e+08	1.37741e+11	174	Occidental Tethys; World
France	Carajuan	2.39633e+08	1.81163e+10	17	Occidental Tethys; World
Mexico Gulf	DSDP535	9.81463e+08	1.20267e+11	41	World
North Atlantic	ODP638	1.37684e+09	1.72291e+11	38	Occidental Tethys; World
North Sea	BGS 81/43	3.48889e+09	1.52169e+10	9	Occidental Tethys; World
